# Supplementary material for: Loss of endothelial glucocorticoid receptor accelerates diabetic nephropathy
Source: PubMed Central journal article supplement (PMC8062600; doi:10.1038/s41467-021-22617-y), 2021-04-22
Supplement: 41467_2021_22617_MOESM1_ESM.pdf [file 41467_2021_22617_MOESM1_ESM.pdf]

**Supplementary Table 1: Sequences of mouse primers**

| Gene name    | Forward primer              | Reverse primer            |
|--------------|-----------------------------|---------------------------|
| CD31         | 5'-AGGCTTGCATAGAGCTCCAG     | 5'-TTCTTGGTTTCCAGCTATGG   |
| $\alpha$ SMA | 5'-CTGACAGAGGCACCACTGAA     | 5'-GAAATAGCCAAGCTCAG      |
| Axin2        | 5'-AACCTATGCCCGTTTCCTCTA    | 5'-GAGTGTAAGACTTGGTCCACC  |
| Tcf          | 5'-GGTGGCCGAATGCACATTGAAAGA | 5'-TTTGCCTGTTCTTCCCTGGACA |
| FN           | 5'-CGAGGTGACAGAGACCACAA     | 5'-CTGGAGTCAAGCCAGACACA   |
| IL-1 $\beta$ | 5'-CCAAGCAACGACAAAATACC     | 5'-GTTGAAGACAAACCGTTTTTCC |
| IL-6         | 5'-TCTGAAGGACTCTGGCTTTG     | 5'-GATGGATGCTACCAAACCTGGA |
| IL-10        | 5'-CACAAAGCAGCCTTGCAGAA     | 5'-AGAGCAGGCAGCATAGCAGTG  |
| IL-17        | 5'GCTCCAGAAGGCCCTCAGA       | 5'CTTCCCTCCGCATTGACA      |
| CCL4         | 5'CTCAGCCCTGATGCTTCTCAC     | 5'AGAGGGGCAGGAAATCTGAAC   |
| CCL5         | 5'GCTGCTTTGCCTACCTCTCC      | 5'TCGAGTGACAAACACGACTGC   |
| Eotaxin      | 5'-AGCTAGTCGGGAGAGCCTAC     | 5'-AAGGAAGTGACCGTGAGCAG   |
| 18S          | 5'TTCCGATAACGAACGAGACTCT    | 5'GGCTGAACGCCACTTGTC      |

## Supplementary figure legends

### Supplementary Figure 1 Effect of adrenalectomy on renal fibrosis

Adrenalectomized and non-adrenalectomized control and diabetic mice of CD-1 and C57BL/6 strains were evaluated 4 weeks after bilateral adrenal surgery. **(a)** Measurement of plasma corticosterone in control and diabetic CD-1 and C57BL/6 mice.  $n=7$  biologically independent mice/ group combined from two separate experiments. **(b)** Blood glucose measurement in adrenalectomized and non-adrenalectomized mice.  $n=7$  biologically independent mice/group combined from two separate experiments. **(c)** Masson trichrome and Sirius red staining in the kidneys of adrenalectomized and non-adrenalectomized control and diabetic mice. Representative images are shown; original magnification 300x. Area of fibrosis (%) and relative collagen deposition (%) were measured using the ImageJ program.  $n=7$  biologically independent mice/group combined from two separate experiments. Scale bar 50  $\mu\text{m}$ . Data are mean  $\pm$  SEM. One-way Anova with Tukey multiple comparison post hoc test was used to calculate statistical significance. Significance- \* $p < 0.05$ , \*\* $p < 0.01$ , \*\*\*  $p < 0.001$ . Source data are provided as a Source Data file. C-CD1: nondiabetic control CD1, DM-CD1: diabetic CD-1, C-BL6: nondiabetic control C57BL/6, DM-BL6: diabetic C57BL/6 mice and ADX: adrenalectomized.

### Supplementary Figure 2 Determination of kidney endothelial cell purity

Top: Flow cytometry cell purity analysis in isolated endothelial cells from kidneys. CD31+CD45- cells are shown. Bottom: The gating strategy in unstained, blocked endothelial cells is shown.

### Supplementary Figure 3 Analysis of GR protein and mRNA levels in isolated endothelial cells

**(a)** Western blot analysis of GR protein level and **(b)** qPCR analysis of GR mRNA expression were analyzed in isolated endothelial cells from the kidneys of control and GR<sup>ECKO</sup> mice.  $n=7$  biologically independent control mice,  $n=8$  biologically independent GR<sup>ECKO</sup> mice. Three independent experiments were analyzed. Data are mean  $\pm$  SEM.

Student's t-test (unpaired two-tailed) was used for analysis of statistical significance. Significance- \* $p < 0.05$ , \*\*  $p < 0.01$ , \*\*\* $p < 0.001$ . Source data are provided as a Source Data file.

#### **Supplementary Figure 4 Physiological characteristics of nondiabetic mice**

Body weight, blood glucose, kidney/body weight, heart/body weight, liver/body weight, albumin-to-creatinine ratio, plasma triglycerides, plasma cholesterol and systolic blood pressure in nondiabetic control, GR<sup>ECKO</sup>, *Apoe*<sup>-/-</sup> and DKO mice are shown. n=6 biologically independent mice/group, except for blood pressure where n=8 biologically independent mice/group, are combined from two separate experiments. Data are mean  $\pm$  SEM. One-way Anova with Tukey multiple comparison post-test was used to calculate statistical significance. Significance- \* $p < 0.05$ , \*\* $p < 0.01$ , \*\*\* $p < 0.001$ . Source data are provided as a Source Data file.

#### **Supplementary Figure 5 Evaluation of glomerular fibrosis in nondiabetic and diabetic mice.**

**(a)** Periodic acid Schiff (PAS) staining in the kidneys of nondiabetic and diabetic control, GR<sup>ECKO</sup>, *Apoe*<sup>-/-</sup> and DKO mice. Scale bar 50  $\mu$ m. n=7 biologically independent mice/group combined from two separate experiments. Representative images are shown. **(b)** Immunohistochemical analysis of vimentin expression in the kidneys of nondiabetic and diabetic control, GR<sup>ECKO</sup>, *Apoe*<sup>-/-</sup> and DKO mice. n=7 biologically independent mice/group combined from two separate experiments. Scale bar 50  $\mu$ m. Representative images are shown; original magnification 200x.

#### **Supplementary Figure 6 Expression of Snail1, PPAR $\alpha$ and HIF1 $\alpha$ in nondiabetic and diabetic mice.**

Immunohistochemical analysis of Snail1, PPAR $\alpha$  and HIF1 $\alpha$  expression in the kidneys of nondiabetic and diabetic control, GR<sup>ECKO</sup>, *Apoe*<sup>-/-</sup> and DKO mice. Scale bar 50  $\mu$ m. n=7 biologically independent mice/group combined from two separate experiments. Representative images are shown; original magnification 200x.

### **Supplementary Figure 7 Collagen I and fibronectin deposition in nondiabetic and diabetic mice.**

Immunofluorescence analysis of collagen I and fibronectin was performed in the kidneys of non-diabetic and diabetic control, GR<sup>ECKO</sup>, *ApoE*<sup>-/-</sup> and DKO mice. FITC labeled-collagen I, rhodamine labeled-fibronectin and DAPI (blue) were used. Scale bar 50  $\mu$ m. n=7 biologically independent mice/group. Representative images from two separate experiments are shown; original magnification 300x.

### **Supplementary Figure 8 Loss of endothelial cell GR worsens fibrosis in a mouse model of unilateral ureteral obstruction (UUO)**

**a.** Schematic presentation of UUO model. Left kidneys were ligated in control littermates and GR<sup>ECKO</sup> mice. On days 5 and 10 kidneys were excised. **(b)** Masson trichrome and Sirius red staining in contralateral and UUO-operated kidneys were analyzed.

Representative images are shown; original magnification 200x. Area of fibrosis (%) and relative collagen deposition (RCD %) were measured using the ImageJ program. n=8 biologically independent mice/group combined from three independent experiments.

Scale bar 50  $\mu$ m. Data are mean  $\pm$  SEM. Two-way Anova with Tukey multiple comparison post hoc test was used to calculate statistical significance. Significance-

\* $p < 0.05$ . **(c)** Immunofluorescence analysis of collagen I, aquaporin/ $\alpha$ -SMA and aquaporin/fibronectin were performed in the contralateral and UUO-operated kidneys of control and GR<sup>ECKO</sup> mice. FITC labeled- collagen I,  $\alpha$ SMA and fibronectin, rhodamine-labeled aquaporin and DAPI (blue) were used. Representative images are shown; original magnification 300x. Scale bar 50  $\mu$ m. n=7 biologically independent mice/group combined from two experiments. Con: control; Contra: contralateral kidneys; FN: fibronectin. Source data are provided as a Source Data file. Components of this figure were created using Servier Medical Art templates, which are licensed under a Creative Commons Attribution 3.0 Unported License; <https://creativecommons.org/licenses/by/3.0/>

### **Supplementary Figure 9 Dexamethasone treatment in urinary obstruction**

**(a)** Masson trichrome staining in dexamethasone-treated and vehicle-treated UUO mice; original magnification 200x. Mice were treated with dexamethasone 1 mg/kg in

the drinking water until the day of sacrifice. Time dependent analysis on days 10 and 15 are presented. Representative images are shown. Relative area of fibrosis (%) was measured using the ImageJ program. n=7 biologically independent mice/group combined from two independent experiments. Scale bar 50  $\mu$ m. Data are mean  $\pm$  SEM. One-way Anova with Tukey multiple comparison post hoc test was used to calculate statistical significance. Significance- \*\*\* $p$ <0.001. **(b)** Masson trichrome staining (original magnification 200x) in dexamethasone-treated and vehicle-treated non-diabetic CD-1 mice. Representative images are shown. Relative area of fibrosis (%) was measured using the ImageJ program. n=6 biologically independent mice/group. Scale bar 50  $\mu$ m. Data are mean  $\pm$  SEM. Data were analyzed by Student's t-test (unpaired, two-tailed). Source data are provided as a Source Data file.

### **Supplementary Figure 10 Diabetic kidney disease is associated with cytokine and chemokine reprogramming**

Plasma cytokines and chemokines were measured in nondiabetic control and diabetic CD-1 and C57BL/6 mice by using a cytokine array analysis (Luminex). n=5 biologically independent mice/group. Data are mean  $\pm$  SEM. One-way Anova with Tukey multiple comparison post hoc test was used to calculate statistical significance. Significance- \* $p$ <0.05, \*\* $p$ <0.01, \*\*\* $p$ <0.001. Source data are provided as a Source Data file. C-CD1: nondiabetic control CD1, DM-CD1: diabetic CD-1, C-BL6: nondiabetic control C57BL/6, DM-BL6: diabetic C57BL/6 mice.

### **Supplementary Figure 11 Cytokine and chemokine reprogramming in non-diabetic and diabetic GR<sup>ECKO</sup> and DKO mice**

**(a)** Plasma cytokines and chemokines were measured in non-diabetic and diabetic GR<sup>ECKO</sup> and DKO mice by using a cytokine array analysis (Luminex). n=5 biologically independent mice/group. Data are mean  $\pm$  SEM. **(b)** Relative gene expression analysis of the cytokines shown were evaluated in diabetic kidneys. n=6 biologically independent mice/group. 18S was used to normalize the expression level. Data are mean  $\pm$  SEM. In both panels, one-way Anova with Tukey multiple comparison post hoc test was used to

calculate statistical significance. Significance- \* $p < 0.05$ , \*\* $p < 0.01$ , \*\*\* $p < 0.001$ . Source data are provided as a Source Data file.

### **Supplementary Figure 12 IL-6 neutralization rescues the fibrotic phenotype in kidneys of diabetic CD-1 mice**

IL-6 IgG and control IgG were injected intraperitoneally three times per week for four weeks at a dose of 3 mg/kg in both non-diabetic and diabetic CD-1 mice. **(a-b)** Western blot analysis of vimentin and  $\alpha$ -SMA in recombinant IL1 $\beta$ -, IL-6-, TNF $\alpha$ - and TGF $\beta$ -stimulated isolated endothelial cells from CD-1 mice. Representative blots from three independent experiments were analyzed. Densitometry calculations are shown relative to  $\beta$ -actin. **(c)** Western blot analysis of vimentin in TGF $\beta$ -stimulated and unstimulated endothelial cells treated with N-IL1 $\beta$  (neutralization antibody- IL-1 $\beta$ ), and N-IL-6 (neutralization antibody- IL-6) antibodies. Representative blots from three independent experiments were evaluated. Densitometry calculations are shown relative to  $\beta$ -actin. **(d)** IL-6 neutralization in control and diabetic CD-1 mice. Representative images of Masson trichrome and Sirius red staining (original magnification 300x) are shown.  $n=7$  biologically independent mice/group combined from two independent experiments. Relative area of fibrosis (%) and relative collagen (%) were measured using the ImageJ program. Scale bar 50  $\mu$ m. Data are mean  $\pm$  SEM. In all panels, one-way Anova with Tukey multiple comparison post-test was used to calculate statistical significance. Significance- \* $p < 0.05$ , \*\* $p < 0.01$ , \*\*\* $p < 0.001$ . Source data are provided as a Source Data file.

### **Supplementary Figure 13 IL-6 neutralization in nondiabetic GR<sup>ECKO</sup> and DKO mice**

IL-6 IgG and control IgG were injected intraperitoneally three times per week for four weeks at a dose of 3 mg/kg in both non-diabetic GR<sup>ECKO</sup> and DKO mice. Representative images (original magnification 300x) of Masson trichrome (top row) and Sirius red (bottom row) staining are shown.  $n=6$  biologically independent mice/group combined from two experiments. Relative area of fibrosis (%) and relative collagen (%) were measured using the ImageJ program. Scale bar 50  $\mu$ m. Data are mean  $\pm$  SEM. One-

way ANOVA with Tukey post-test was used for analysis of statistical significance. Source data are provided as a Source Data file.

### **Supplementary Figure 14 Gene expression analysis of Wnt signaling and fibrogenic markers**

**(a)** Relative mRNA levels determined by qRT-PCR of *Axin2*, *Tcf*,  *$\alpha$ SMA*, *fibronectin*, *Snail1*, *Hif1 $\alpha$*  and *Ppara* were analyzed in isolated endothelial cells from the kidneys of nondiabetic and diabetic control, GR<sup>ECKO</sup>, *Apoe*<sup>-/-</sup> and DKO mice. Endothelial cells from n=6 biologically independent mice/group were evaluated. The combined data from four independent experiments were analyzed. Data are mean  $\pm$  SEM. **(b)** Relative mRNA levels determined by qRT-PCR of *Axin2*, *Tcf*, and *fibronectin* were analyzed in isolated endothelial cells from cultured glomeruli from kidneys of nondiabetic and diabetic control and GR<sup>ECKO</sup> mice. n=6 biologically independent mice/group were analyzed. The combined data from three independent experiments were analyzed. Data are mean  $\pm$  SEM. In (a) and (b) one-way ANOVA with Tukey post-test was used for analysis of statistical significance. Significance- \* $p$ <0.05, \*\* $p$ <0.01, \*\*\* $p$ <0.001. Source data are provided as a Source Data file. **(c)** Immunohistochemical analysis of  $\beta$ -catenin in the kidneys of indicated groups. Representative images are shown; original magnification 300x. n=7 biologically independent mice/group combined from three independent experiments. Scale bar 50  $\mu$ m.

### **Supplementary Figure 15 Endothelial cell characteristics**

**(a)** Endothelial cell leakage in the kidneys of the nondiabetic and diabetic, control, GR<sup>ECKO</sup>, *Apoe*<sup>-/-</sup> and DKO mice was assessed 2 hours after fluorescein isothiocyanate (FITC)-dextran injection in mice. FITC-dextran (green), rhodamine-labeled CD31 (red) and DAPI (blue) were used. Merged images and representative pictures (original magnification 300x) are shown. Arrows indicate FITC-dextran only-labeled cells and areas of leakage. n=7 biologically independent mice/group combined from three experiments. Scale bar 50  $\mu$ m. Quantification is shown below the images. ND: non-diabetic, D: diabetic. Data are mean  $\pm$  SEM. **(b)** The permeability of isolated endothelial

cell monolayers was assessed using Transwell inserts by measuring the passage of FITC-dextran added in the top compartment to the bottom compartment. After 24 hrs, the concentration of FITC-dextran in the bottom compartment was measured with a fluorescence plate reader. Endothelial cells isolated from six biologically independent mice were evaluated. Three independent experiments were analyzed. **(c)** Endothelial cell density (%) as measured by CD31 staining from Fig S15a. Endothelial cells isolated from six biologically independent mice were evaluated. Three independent experiment were analyzed. Data are mean  $\pm$  SEM. In all panels, one-way Anova with Tukey multiple comparison post hoc test was used to calculate statistical significance. Significance- \* $p$ <0.05, \*\* $p$ <0.01, \*\*\* $p$ <0.001. Source data are provided as a Source Data file.

### **Supplementary Figure 16 Inhibition of Wnt signaling abolished the fibrogenic phenotype in mice**

**(a)** Immunohistochemical analysis of  $\beta$ -catenin expression in the kidneys of control and diabetic CD-1 and C57BL/6 mice.  $n=8$  biologically independent mice/group combined from two independent experiments were evaluated. Scale bar 50  $\mu$ m. Representative images are shown; original magnification 200x. **(b)** Relative mRNA expression determined by qRT-PCR of *Axin2*, *Tcf* and *fibronectin*, in kidneys of control and diabetic CD-1 and C57BL/6 mice.  $n=6$  biologically independent mice/group combined from two experiments were evaluated. Expression was normalized to the internal control 18S. **(c)** Schematic diagram representing the treatment protocol of Wnt inhibitor (LGK974; 5 mg/kg body weight) in diabetic CD-1 mice and **(d)** in UUO mice. **(e)** Masson trichrome and Sirius red staining in the kidneys of diabetic and Wnt inhibitor-treated diabetic CD-1 mice. Representative images (original magnification 300x) are shown. Relative area of fibrosis (%) and relative collagen deposition (%) were measured using the ImageJ program.  $n=8$  biologically independent mice/group combined from two experiments were evaluated. Scale bar 50  $\mu$ m. **(f)** Masson trichrome and Sirius red staining in the kidneys of UUO and Wnt inhibitor-treated UUO mice. Representative images (original magnification 300x) are shown. Relative area of fibrosis (%) and relative collagen deposition (%) were measured using the ImageJ program.  $n=8$  biologically independent



mice/group combined from two experiments were evaluated. Scale bar 50  $\mu\text{m}$ . **(g-h)** GR protein levels in CD31-positive cells were analyzed by immunofluorescence in the kidneys of Wnti-treated diabetic mice and Wnti-treated UUO mice. FITC-labeled GR, rhodamine-labeled CD31 and DAPI (blue) were used. Merged images and representative pictures are shown; original magnification 300x. n=7 biologically independent mice/group combined from four experiments were evaluated. Scale bar 50  $\mu\text{m}$ . **(i-j)** Immunohistochemical analysis of active  $\beta$ -catenin expression in Wnti-treated diabetic mice and Wnti-treated UUO mice. n=7 biologically independent mice/group combined from three experiments were evaluated. Scale bar 30  $\mu\text{m}$ . Data are mean  $\pm$  SEM. In all panels, one-way Anova with Tukey multiple comparison post hoc test was used to calculate statistical significance. Significance- \* $p$ <0.05, \*\* $p$ <0.01, \*\*\* $p$ <0.001. Source data are provided as a Source Data file. Components of this figure were created using Servier Medical Art templates, which are licensed under a Creative Commons Attribution 3.0 Unported License; <https://creativecommons.org/licenses/by/3.0/>

### **Supplementary Figure 17 Inhibition of Wnt signaling disrupts cytokine and chemokine reprogramming in diabetic mice**

Plasma cytokines and chemokines were measured in diabetic CD-1 mice with and without Wnti treatment by using a cytokine array analysis (Luminex). n=5 biologically independent mice/group. Data are mean  $\pm$  SEM. Student's t-test (unpaired two-tailed) was used for analysis of statistical significance. Significance- \* $p$ <0.05. Source data are provided as a Source Data file.

### **Supplementary Figure 18 Physiological characteristics of Wnt inhibitor treatment in nondiabetic control and GR<sup>ECKO</sup> mice.**

Physiological parameters including body weight, blood glucose, and kidney weight/body weight are shown. n=7 biologically independent mice/group combined from two experiments were analyzed. Data are mean  $\pm$  SEM. One-way Anova with Tukey multiple comparison post hoc test was used to calculate statistical significance. Source data are provided as a Source Data file.

**Supplementary Figure 19 Histological analysis of kidneys from Wnt inhibitor-treated nondiabetic control and GR<sup>ECKO</sup> mice.**

**(a)** Masson trichrome staining (MTS) and Sirius red staining in Wnt inhibitor-treated nondiabetic control and GR<sup>ECKO</sup> mice. Representative images are shown; original magnification 200x. Area of fibrosis (%) and relative collagen deposition (%) were measured using the ImageJ program. N=5 biologically independent mice/group were analyzed. Data are mean  $\pm$  SEM. Scale bar 50  $\mu$ m. **(b)** Immunohistochemical analysis of  $\beta$ -catenin expression in the kidneys of Wnt inhibitor-treated nondiabetic control and GR<sup>ECKO</sup> mice. Scale bar 30  $\mu$ m. n=6 biologically independent mice/group combined from two independent experiments were analyzed. Representative images are shown; original magnification 300x. One-way Anova with Tukey multiple comparison post hoc test was used to calculate statistical significance. Significance- \* $p$ <0.05, \*\* $p$ <0.01, \*\*\* $p$ <0.001. Source data are provided as a Source Data file.

**Supplementary Figure 20 Expression of Snail1, PPAR $\alpha$  and HIF1 $\alpha$  in Wnt inhibitor-treated nondiabetic and diabetic mice**

Immunohistochemical analysis of Snail1, PPAR $\alpha$  and HIF1 $\alpha$  expression in the Wnt-treated and untreated control, and GR<sup>ECKO</sup> mice. Scale bar 50  $\mu$ m. n=7 biologically independent mice/group combined from three independent experiments were analyzed. Representative images are shown; original magnification 200x.

**Supplementary Figure 21 Snail1, PPAR $\alpha$ , active- $\beta$ -catenin and HIF1 $\alpha$  in isolated cells from Wnt inhibitor-treated diabetic mice**

Western blot analysis of Snail1, PPAR $\alpha$ , active- $\beta$ -catenin, and HIF1 $\alpha$  proteins in isolated endothelial cells. Representative blots are shown. Densitometry calculations are combined from three independent experiments Data are mean  $\pm$  SEM. One-way Anova with Tukey multiple comparison post hoc test was used to calculate statistical significance. Significance- \* $p$ <0.05, \*\* $p$ <0.01, \*\*\* $p$ <0.001. Source data are provided as a Source Data file.

### **Supplementary Figure 22 EndMT and EMT analysis in kidneys from Wnt inhibitor-treated mice**

Immunofluorescence analysis of  $\alpha$ -SMA/CD31/DAPI and E-cadherin/ $\alpha$ -SMA/DAPI in kidneys of Wnt inhibitor-treated nondiabetic and diabetic mice. Top panel:  $\alpha$ -SMA FITC labelled, CD31 rhodamine labelled and DAPI blue; Lower panel: E-Cadherin FITC-green labelled,  $\alpha$ -SMA red rhodamine labelled and DAPI blue. Representative images are shown; original magnification 400x. Scale bar 50  $\mu$ m. n=6 biologically independent mice/group combined from three independent experiments were analyzed. NC: non-diabetic control; DC: diabetic control; D: diabetic.

### **Supplementary Figure 23 Fatty acid uptake and fatty acid oxidation in isolated endothelial cells**

**(a)** Fatty acid uptake was measured as [ $^{14}$ C]palmitate uptake. **(b)** Fatty acid oxidation, as represented by [ $^{14}$ CO $_2$ ] released. [ $^{14}$ C]palmitate was used as substrate and CPM counts were normalized to protein. In both cases, endothelial cells isolated from n=5 biologically independent mice/group were analyzed in triplicate. Data are mean  $\pm$  SEM. One-way Anova with Tukey multiple comparison post hoc test was used to calculate statistical significance. Significance- \* $p$ <0.05, \*\* $p$ <0.01, \*\*\* $p$ <0.001. Source data are provided as a Source Data file.

### **Supplementary Figure 24 Gene expression of fatty acid transporter proteins in nondiabetic and diabetic mice**

Relative mRNA levels determined by qRT-PCR of *Fatp1*, *Fatp4*, and *Cd36* were analyzed in isolated endothelial cells from kidneys of nondiabetic and diabetic control and GR<sup>ECKO</sup> mice. Endothelial cells isolated from n=5 biologically independent mice/group were analyzed in triplicate. Data are mean  $\pm$  SEM. One-way ANOVA with Tukey post-test was used for the analysis of statistical significance. Significance- \* $p$ <0.05. Source data are provided as a Source Data file.

### **Supplementary Figure 25 Endothelial GR is essential for the action of anti-dyslipidemic drugs in the diabetic kidney disease**

**(a)** Masson trichrome (MTS) and Sirius red staining in kidneys of control, diabetic, fenofibrate-, etomoxir-, C75- and simvastatin-treated diabetic mice. Representative images (original magnification 300x) are shown. Relative area of fibrosis (%) and relative collagen deposition (%) were measured using the ImageJ program. n=6 biologically independent mice/group combined from two experiments were analyzed. Scale bar 50  $\mu$ m. **(b)** Co-immunolabeling of GR/CD31 was analyzed by fluorescence microscopy. FITC-labeled GR, rhodamine-labeled CD31 and DAPI (blue) were used. Representative images are shown; original magnification 300x. Scale bar 50  $\mu$ m. n=6 biologically independent mice/group combined from two experiments were analyzed. **(c)** qPCR gene analysis of fibronectin and  $\alpha$ -SMA in the kidneys. 18S was used as an internal control. n=6 biologically independent mice/group. **(d)** Blood glucose measurements in control, diabetic, fenofibrate-, etomoxir-, C75- and simvastatin-treated diabetic mice. n=6 biologically independent mice/group. **(e)** Radiolabeled [ $^{14}$ C]palmitate oxidation and [ $^{14}$ CO $_2$ ]release were measured. CPM of each sample was counted. Endothelial cells isolated from six biologically independent mice were evaluated. Three independent experiment were analyzed. Data are mean  $\pm$  SEM **(f)** Immunohistochemical analysis of CPT1a and  $\beta$ -catenin was analyzed in the kidneys of control, diabetic, fenofibrate-, C75-, etomoxir- and simvastatin-treated diabetic mice. n=6 biologically independent mice/group. Representative images are shown; original magnification 400x. Scale bar 50  $\mu$ m. Data are mean  $\pm$  SEM. In all panels, one-way Anova with Tukey multiple comparison post hoc test was used to calculate statistical significance. Significance- \* $p$ <0.05, \*\* $p$ <0.01, \*\*\* $p$ <0.001. Con: control, DM: diabetic, feno: fenofibrate. Source data are provided as a Source Data file.

### **Supplementary Figure 26 Physiologic characteristics of nondiabetic etomoxir- and C75-treated mice**

Body weight, blood glucose, and kidney/body weight ratio and fatty acid oxidation as represented by [ $^{14}$ CO $_2$ ]release are shown. [ $^{14}$ C]palmitate was used as substrate and CPM counts were normalized by protein. n=6 biologically independent mice/group. Data

are mean  $\pm$  SEM. One-way Anova with Tukey multiple comparison post hoc test was used to calculate statistical significance. Significance- \* $p$ <0.05. Source data are provided as a Source Data file.

### **Supplementary Figure 27 Histologic analysis of kidneys from non-diabetic etomoxir- and C75- treated mice**

Masson trichrome staining (upper panel) and Sirius red (lower panels) in etomoxir- and C75-treated non-diabetic control and GR<sup>ECKO</sup> mice. Etomoxir (20 mg/kg) and C75 (15 mg/kg) were dosed (IP) three times per week for 3 weeks in GR<sup>ECKO</sup> and control littermates. Representative images are shown; original magnification 400x. Area of fibrosis (%) and relative collagen deposition (%) in n=6 biologically independent mice/group were combined from two independent experiments. Scale bar 50  $\mu$ m. Data are mean  $\pm$  SEM. One-way Anova with Tukey multiple comparison post hoc test was used to calculate statistical significance. Significance- \*\* $p$ <0.01. Source data are provided as a Source Data file.

### **Supplementary Figure 28 GR overexpression suppresses fibrogenic markers in vitro**

Western blotting and corresponding quantification of the protein level of GR and collagen I (normalized to  $\beta$ -actin) and  $\beta$ -catenin and  $\alpha$ -SMA (normalized to HSP90) in HUVECs subjected to either empty vector, GR overexpression vector, empty vector + TGF $\beta$ 2 or GR overexpression vector + TGF $\beta$ 2. Representative blots are shown. Data combined from three independent experiments were analyzed. Data are mean  $\pm$  SEM. One-way Anova with Tukey multiple comparison post hoc test was used to calculate statistical significance. Significance- \*\*\* $p$ <0.001. Source data are provided as a Source Data file.

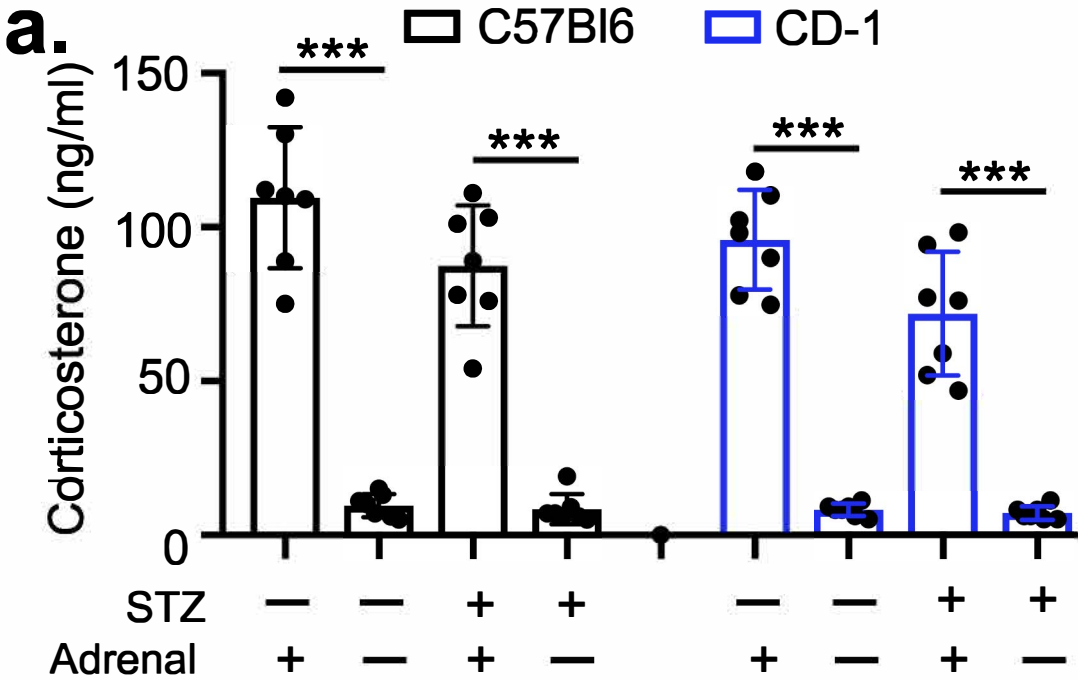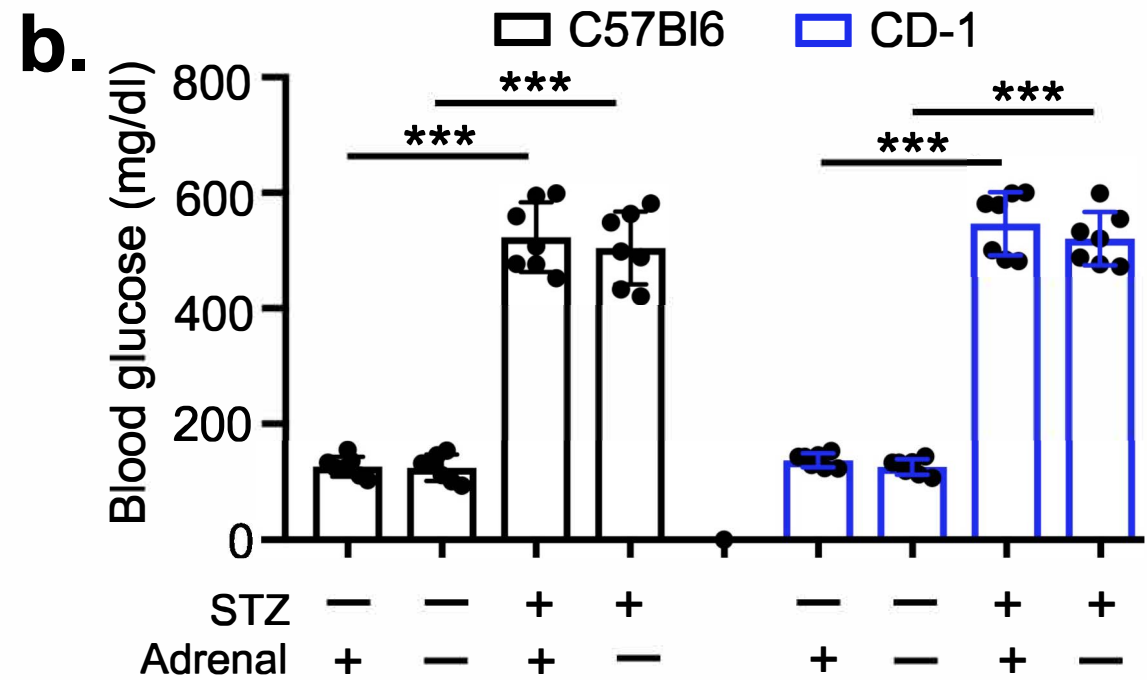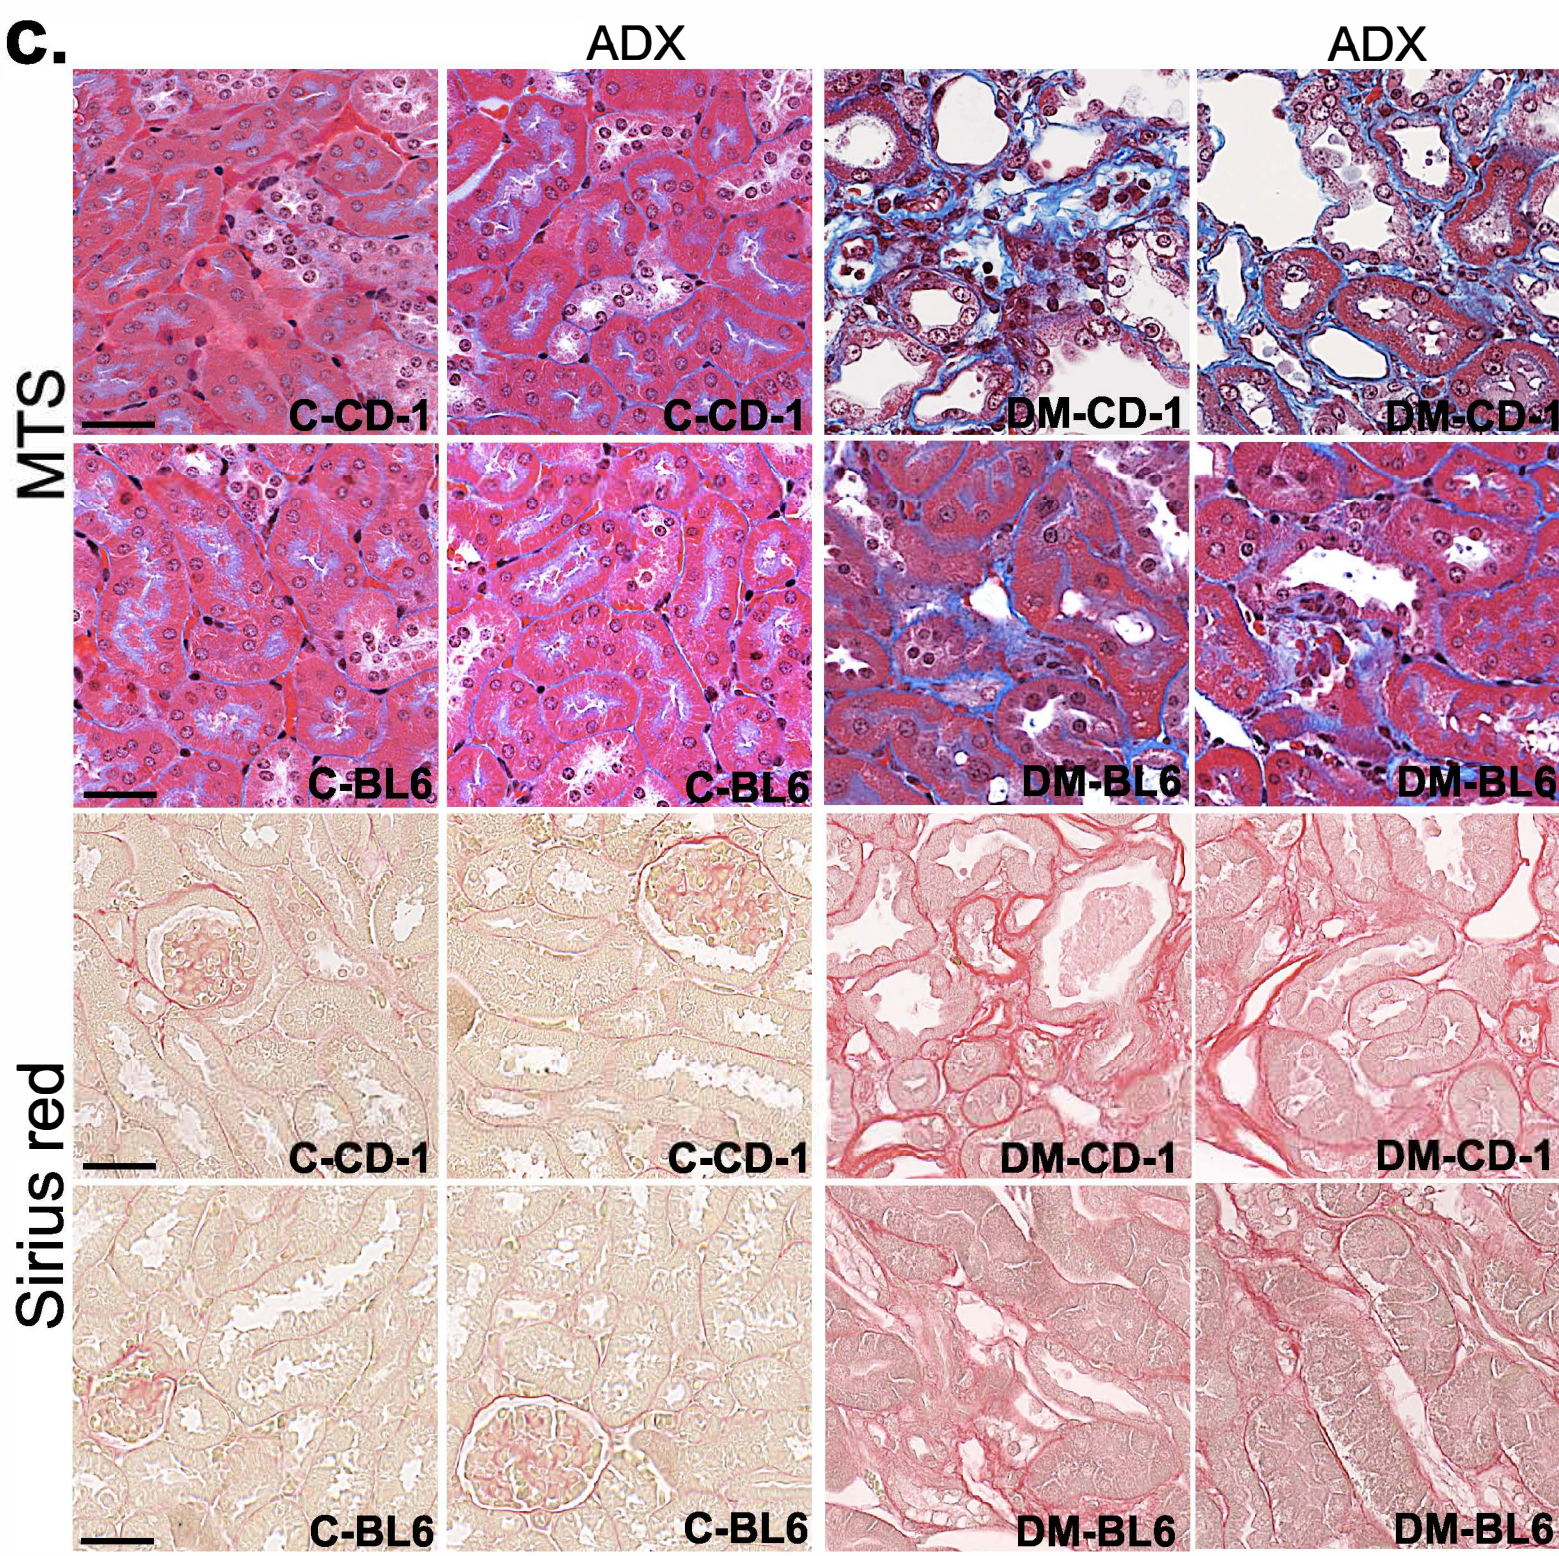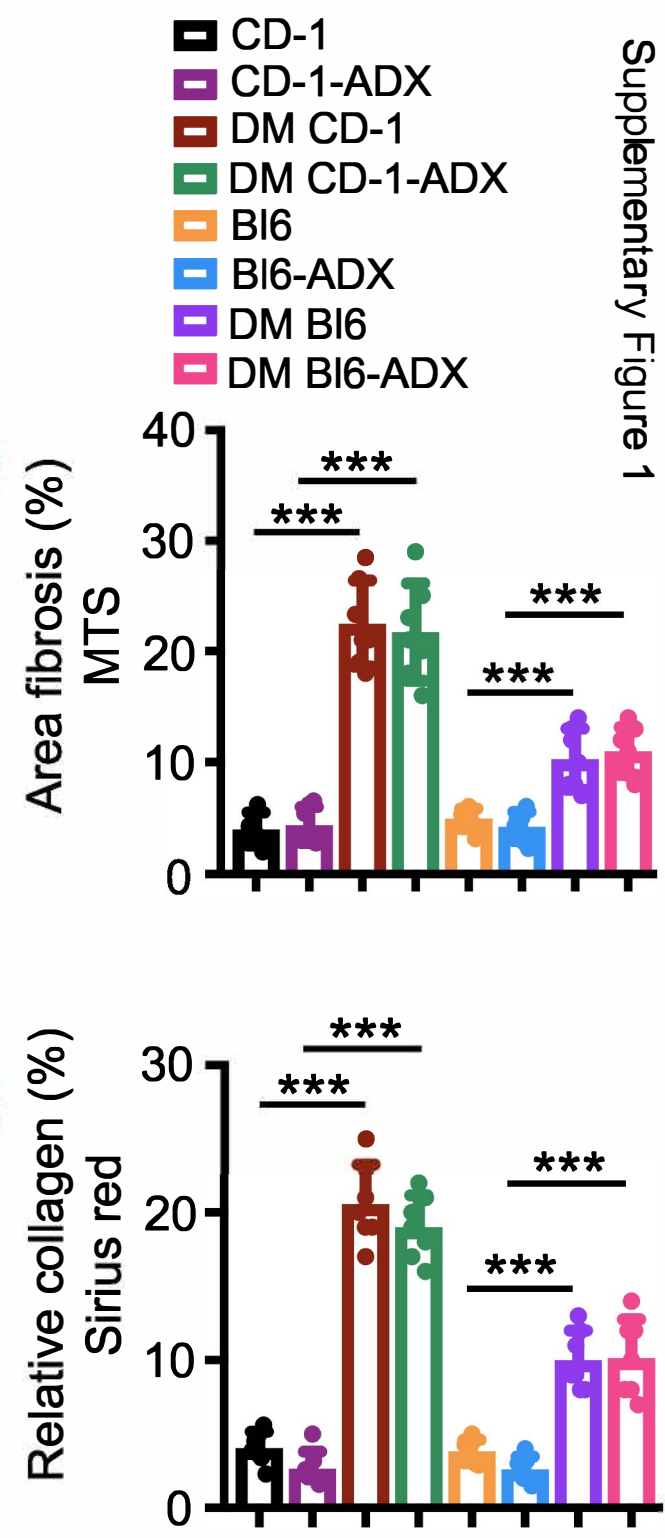

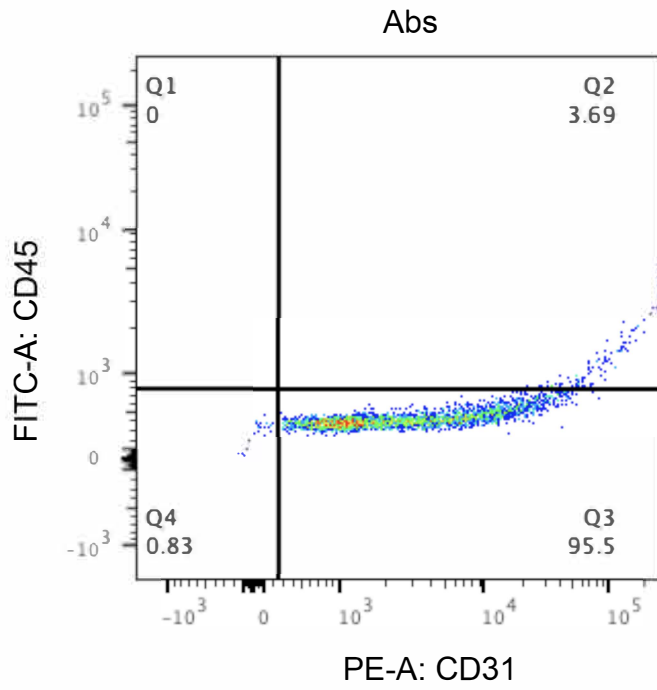

BD FACSDiva 8.0.1

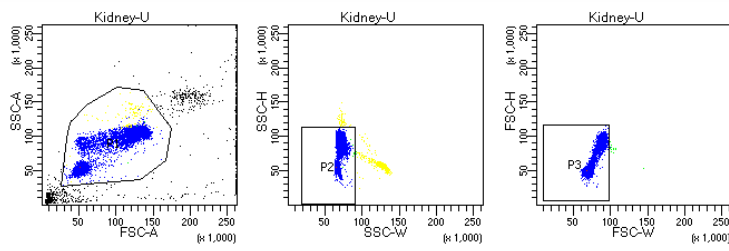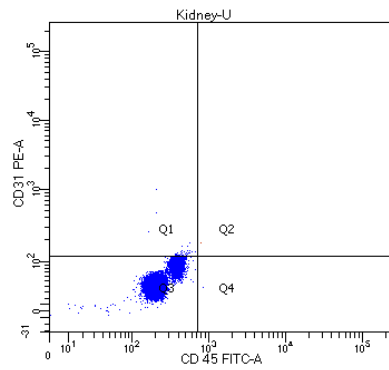

| Tube: U    |         |         |        |
|------------|---------|---------|--------|
| Population | #Events | %Parent | %Total |
| All Events | 21,451  | ###     | 100.0  |
| P1         | 20,533  | 95.7    | 95.7   |
| P2         | 20,017  | 97.5    | 93.3   |
| P3         | 20,004  | 99.9    | 93.3   |
| Q1         | 31      | 0.2     | 0.1    |
| Q2         | 1       | 0.0     | 0.0    |
| Q3         | 19,971  | 99.8    | 93.1   |
| Q4         | 1       | 0.0     | 0.0    |

Supplementary Figure 2

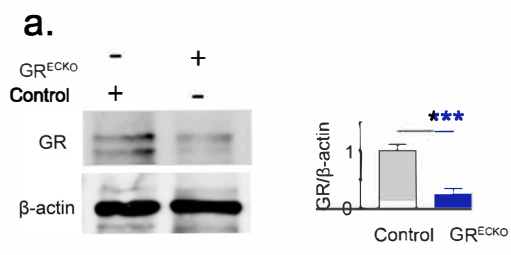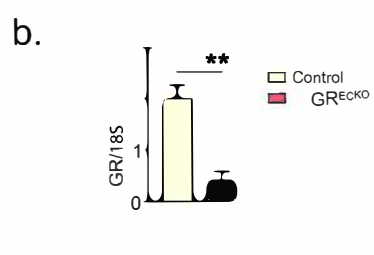

Supplementary Figure 3



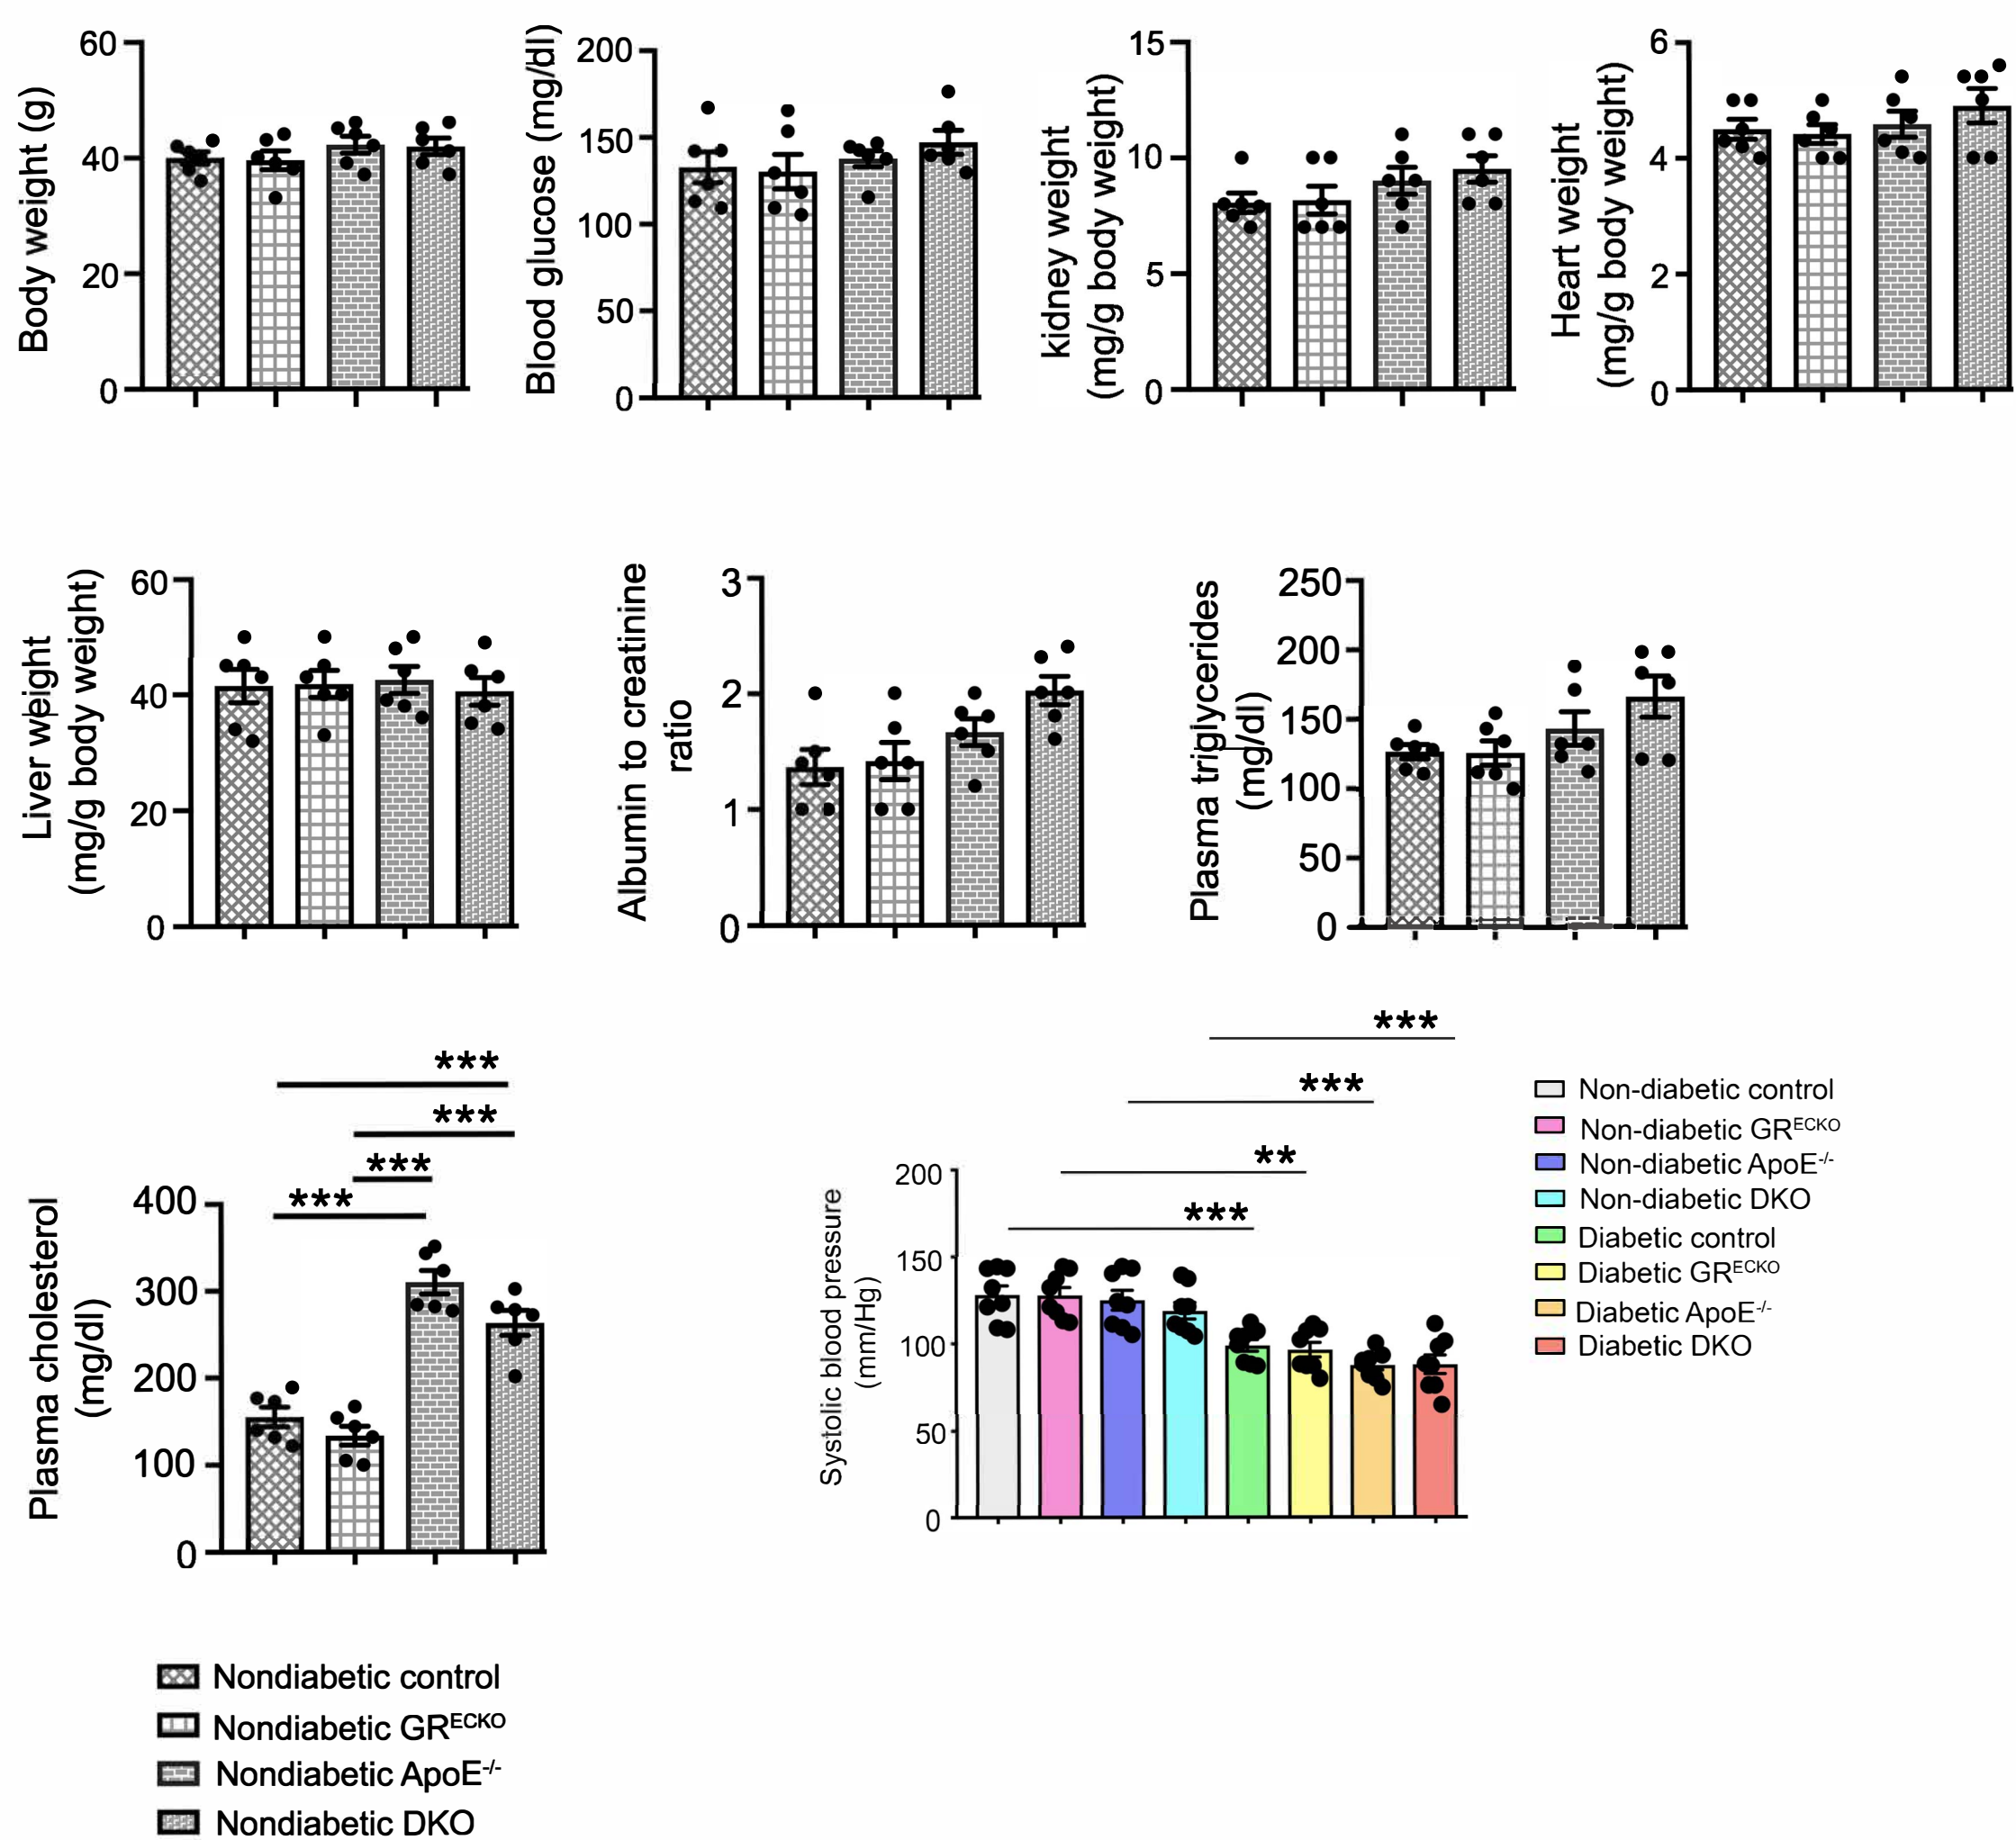

Supplementary Figure 4

**a.****PAS**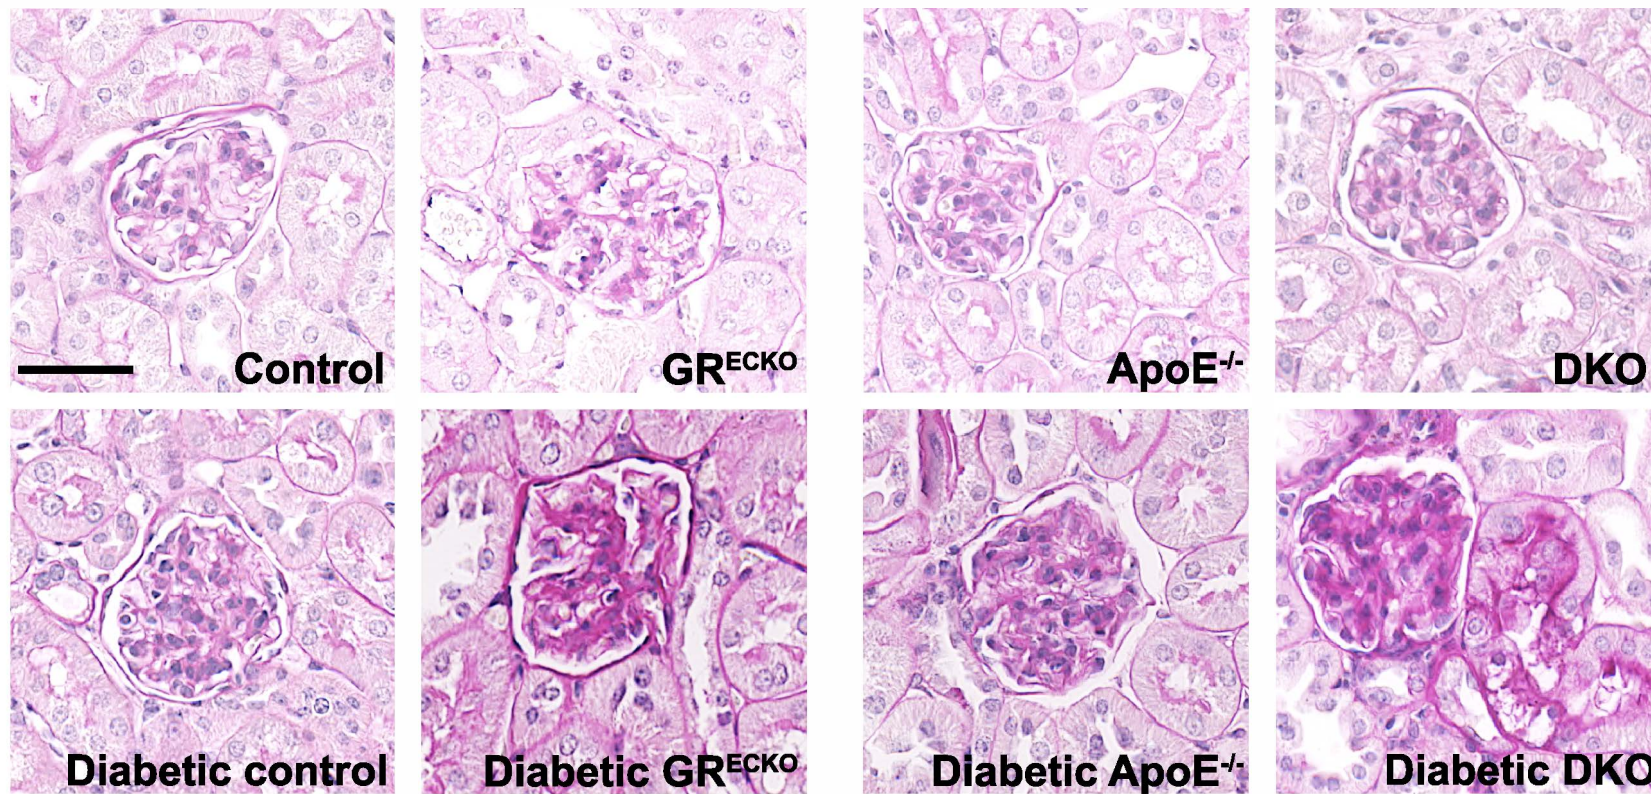**b.****IHC:vimentin**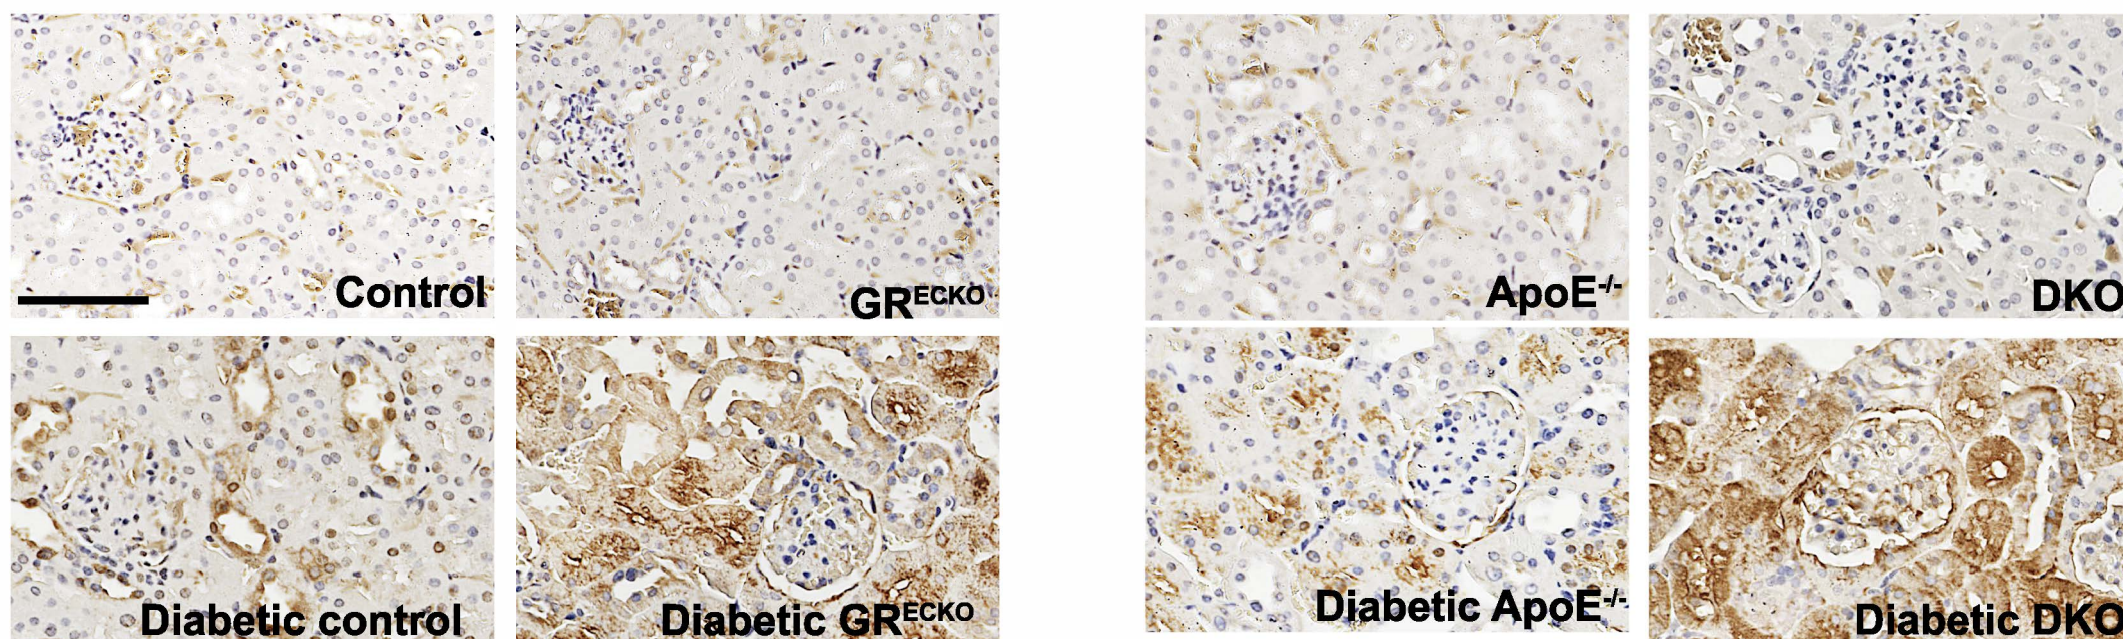

Supplementary Figure 5

IHC: Snail1

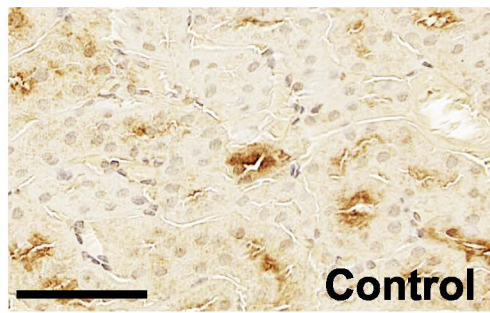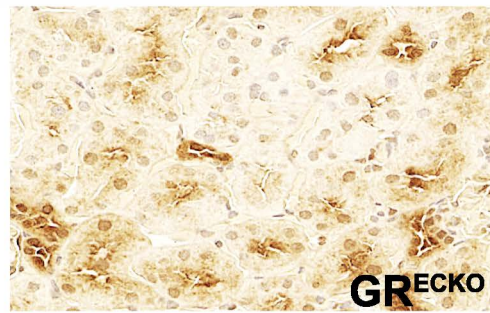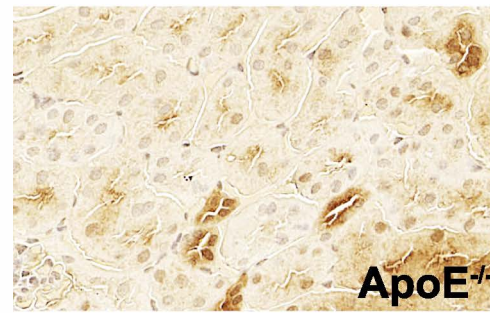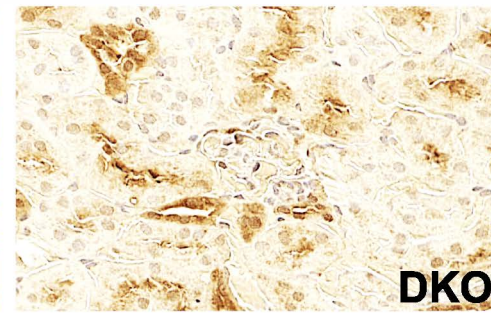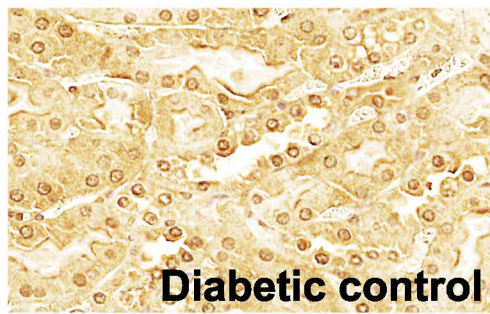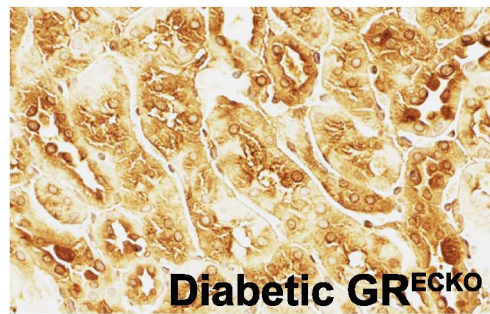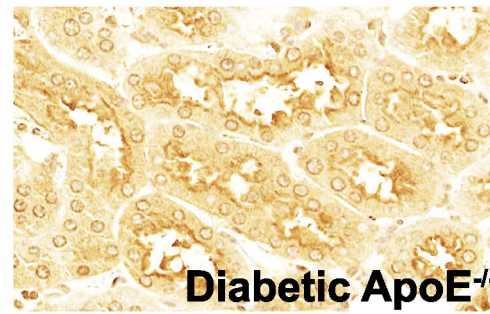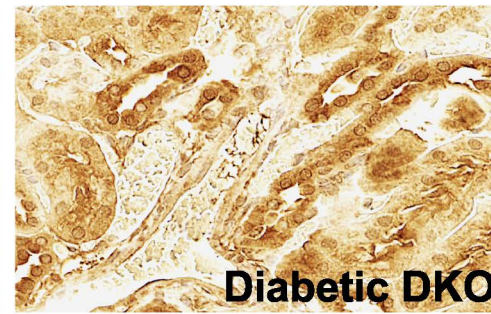

IHC: PPAR $\alpha$

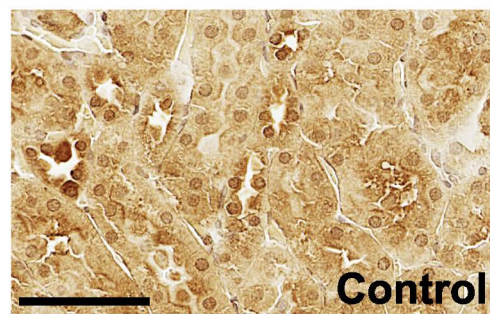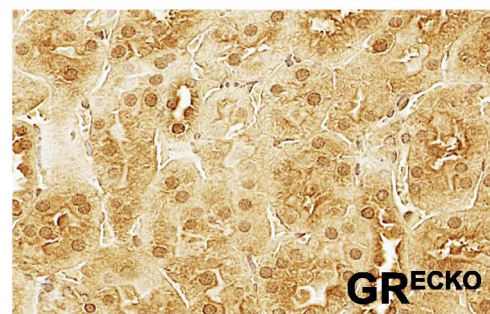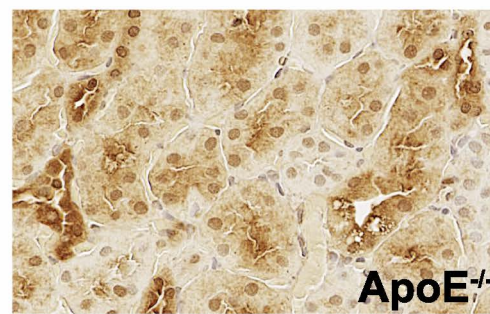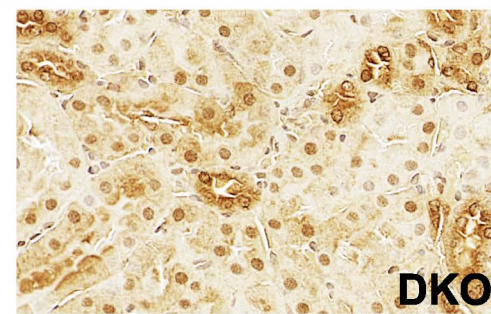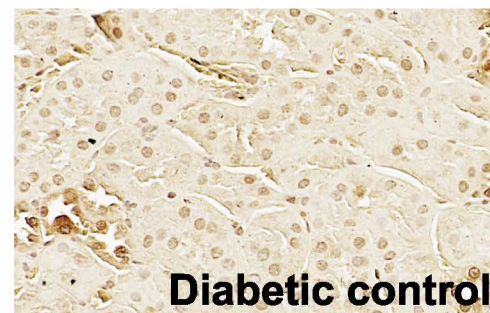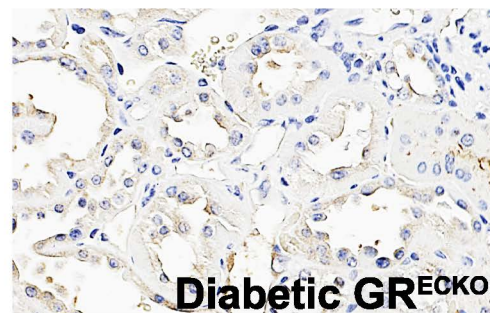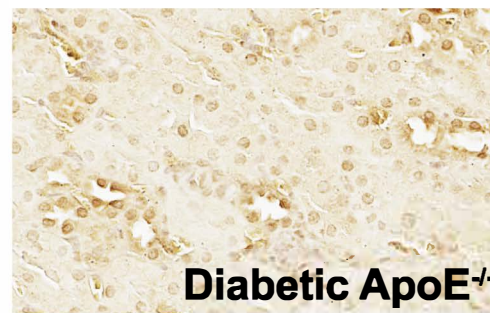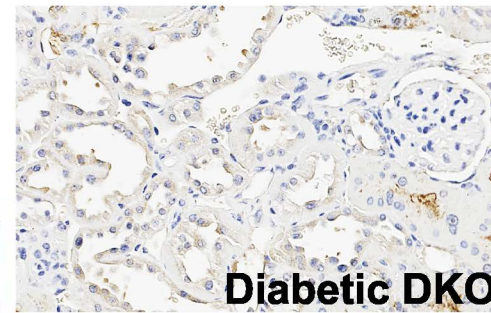

IHC: HIF1 $\alpha$

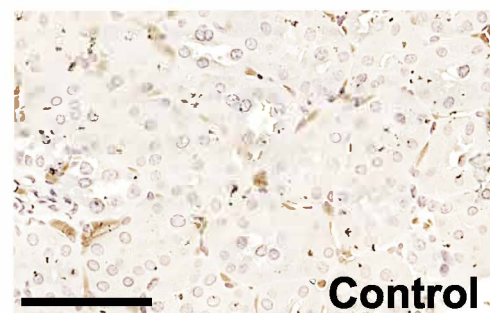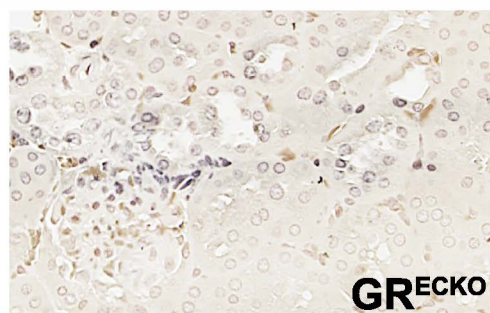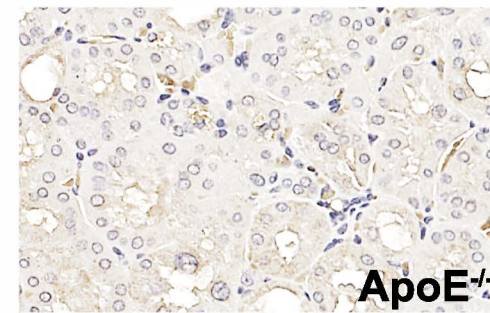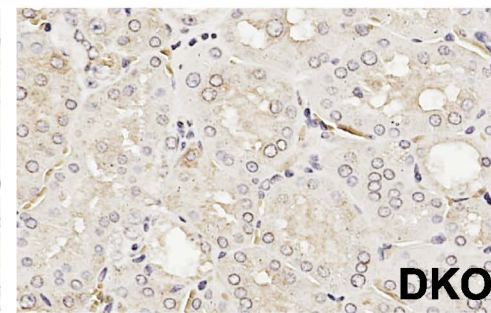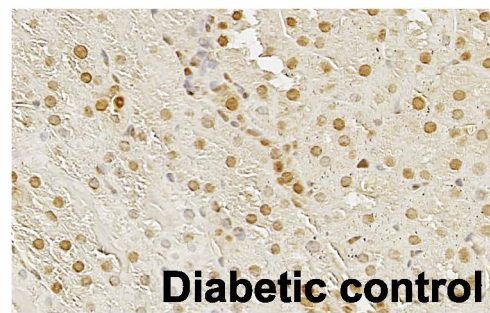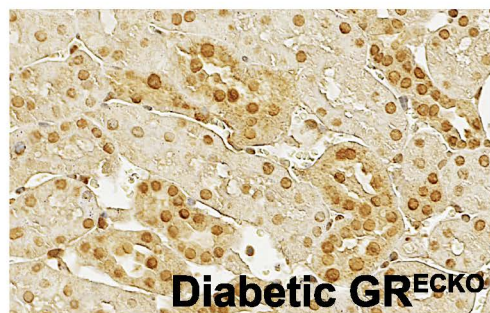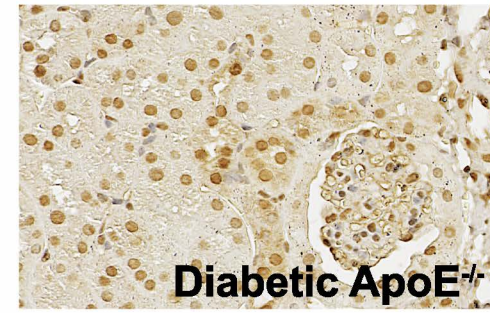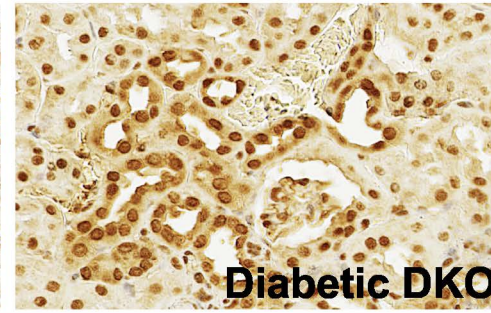

Supplementary Figure 6

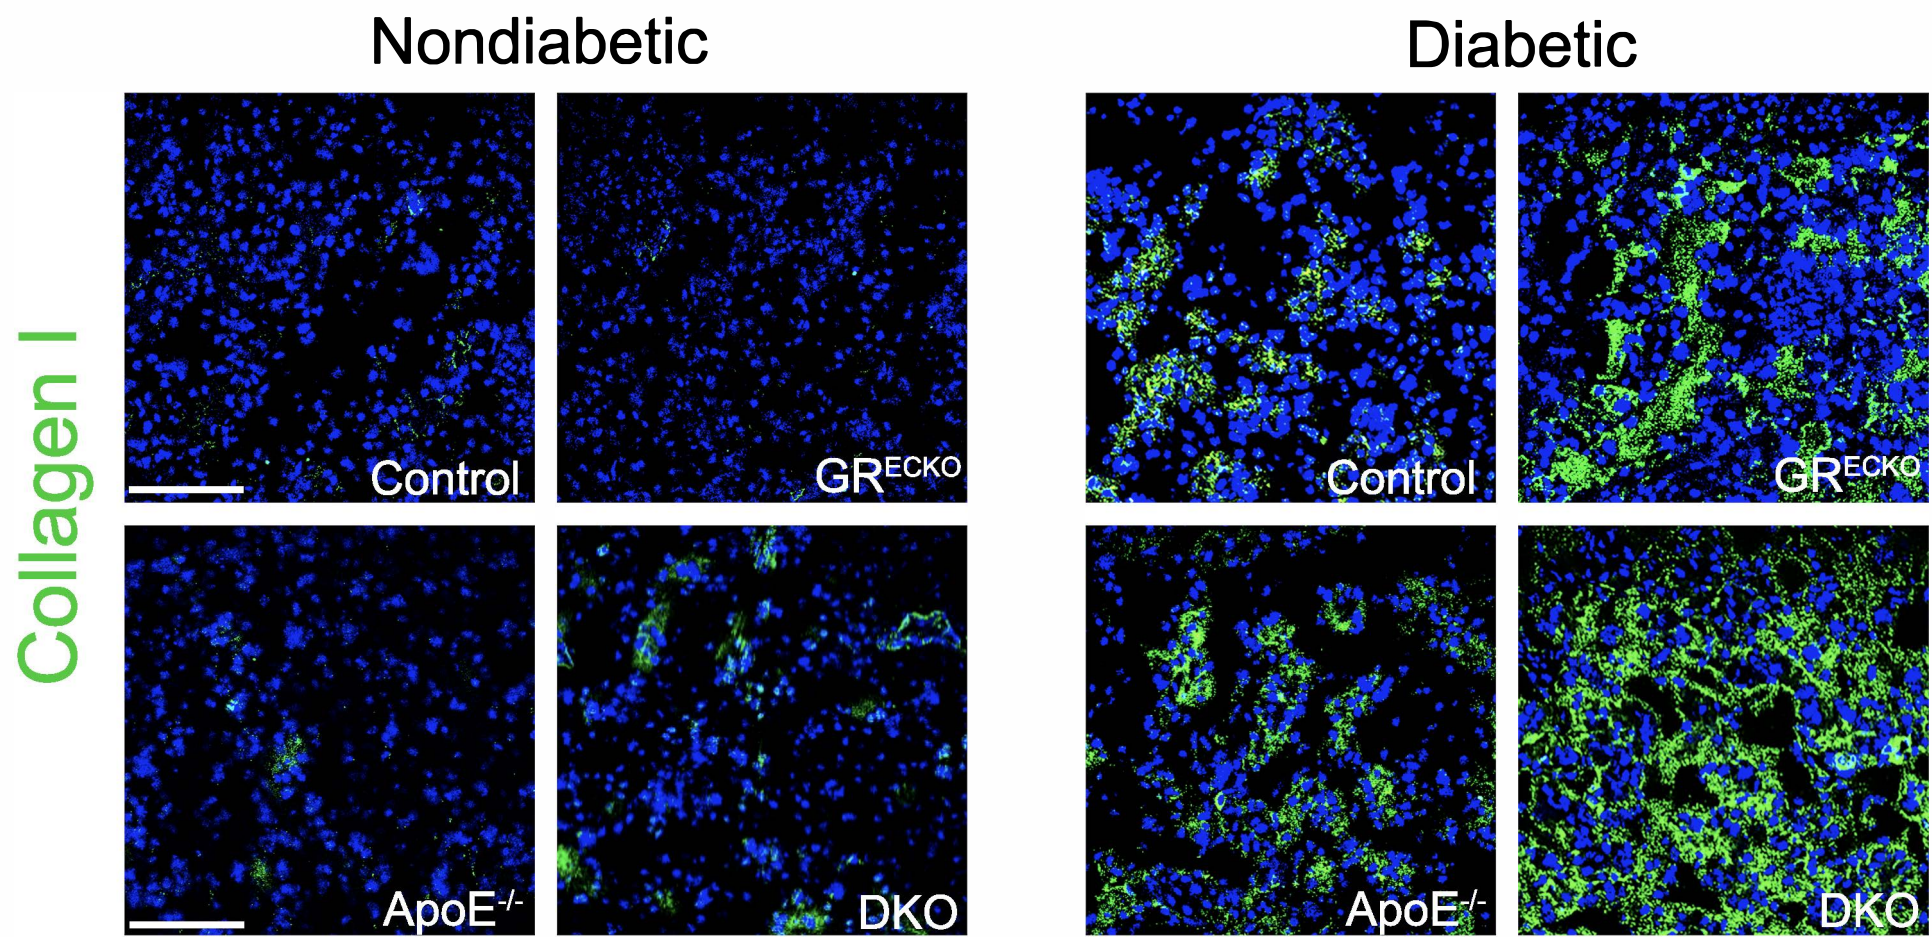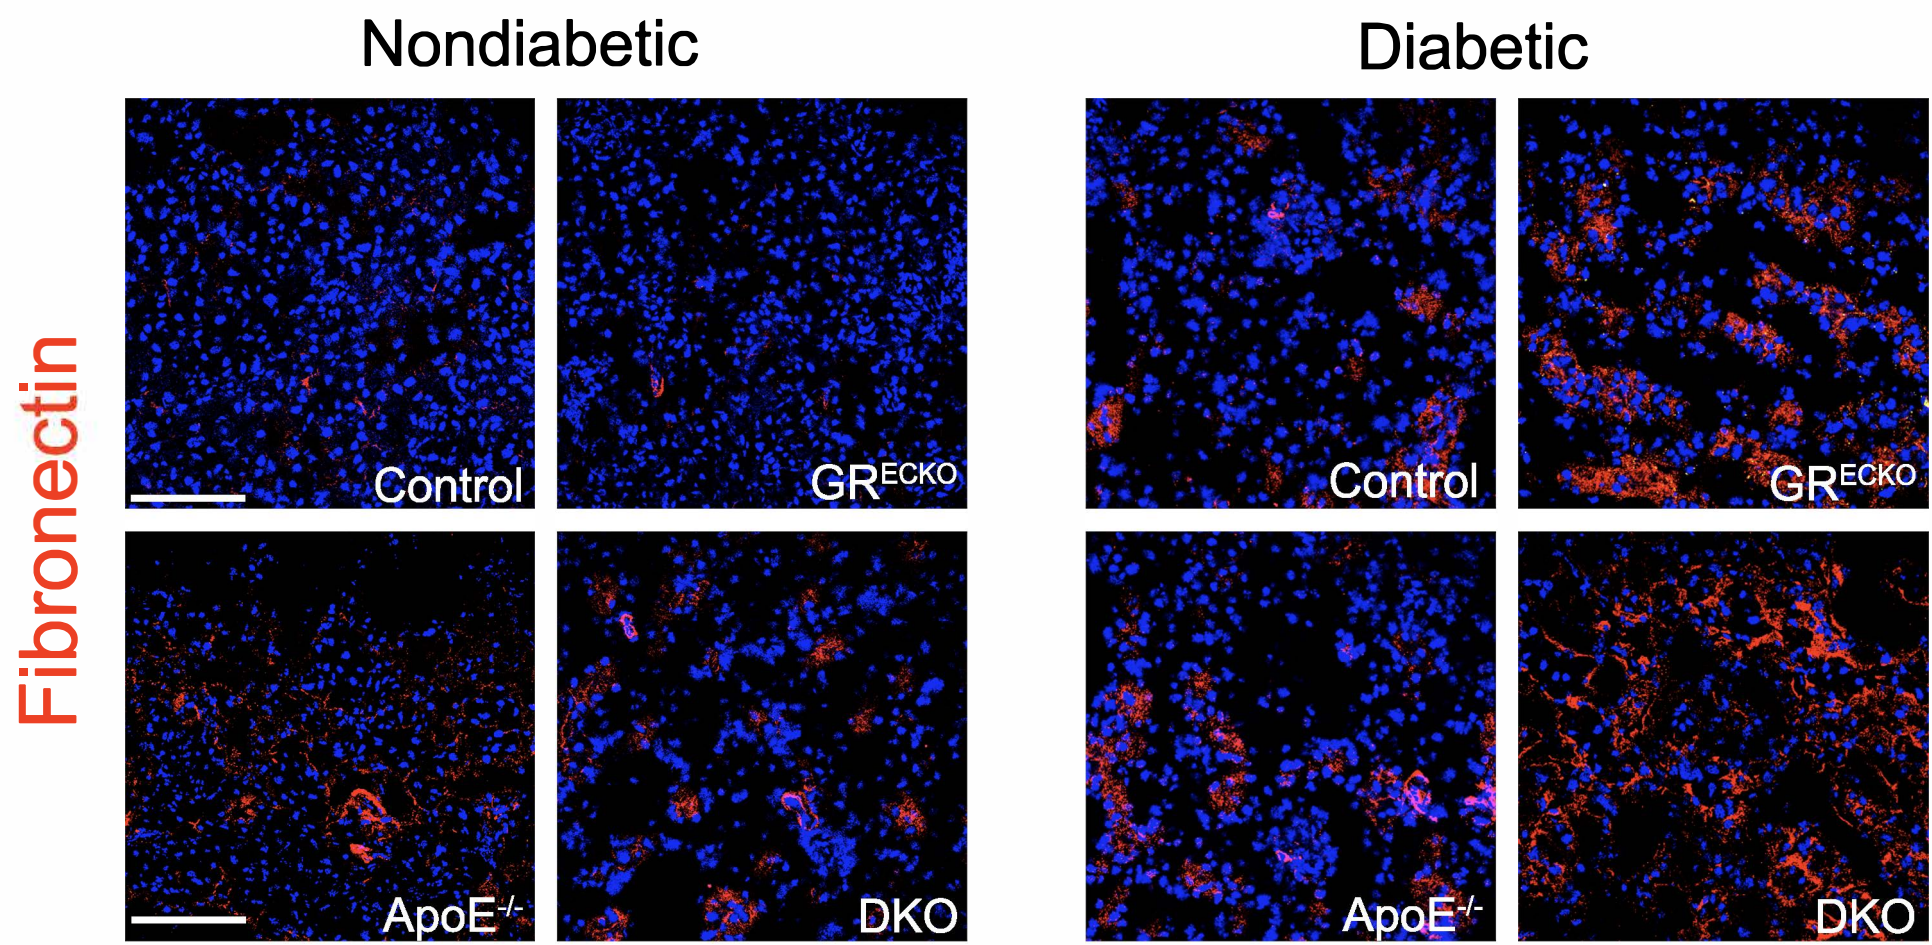

Supplementary Figure 7

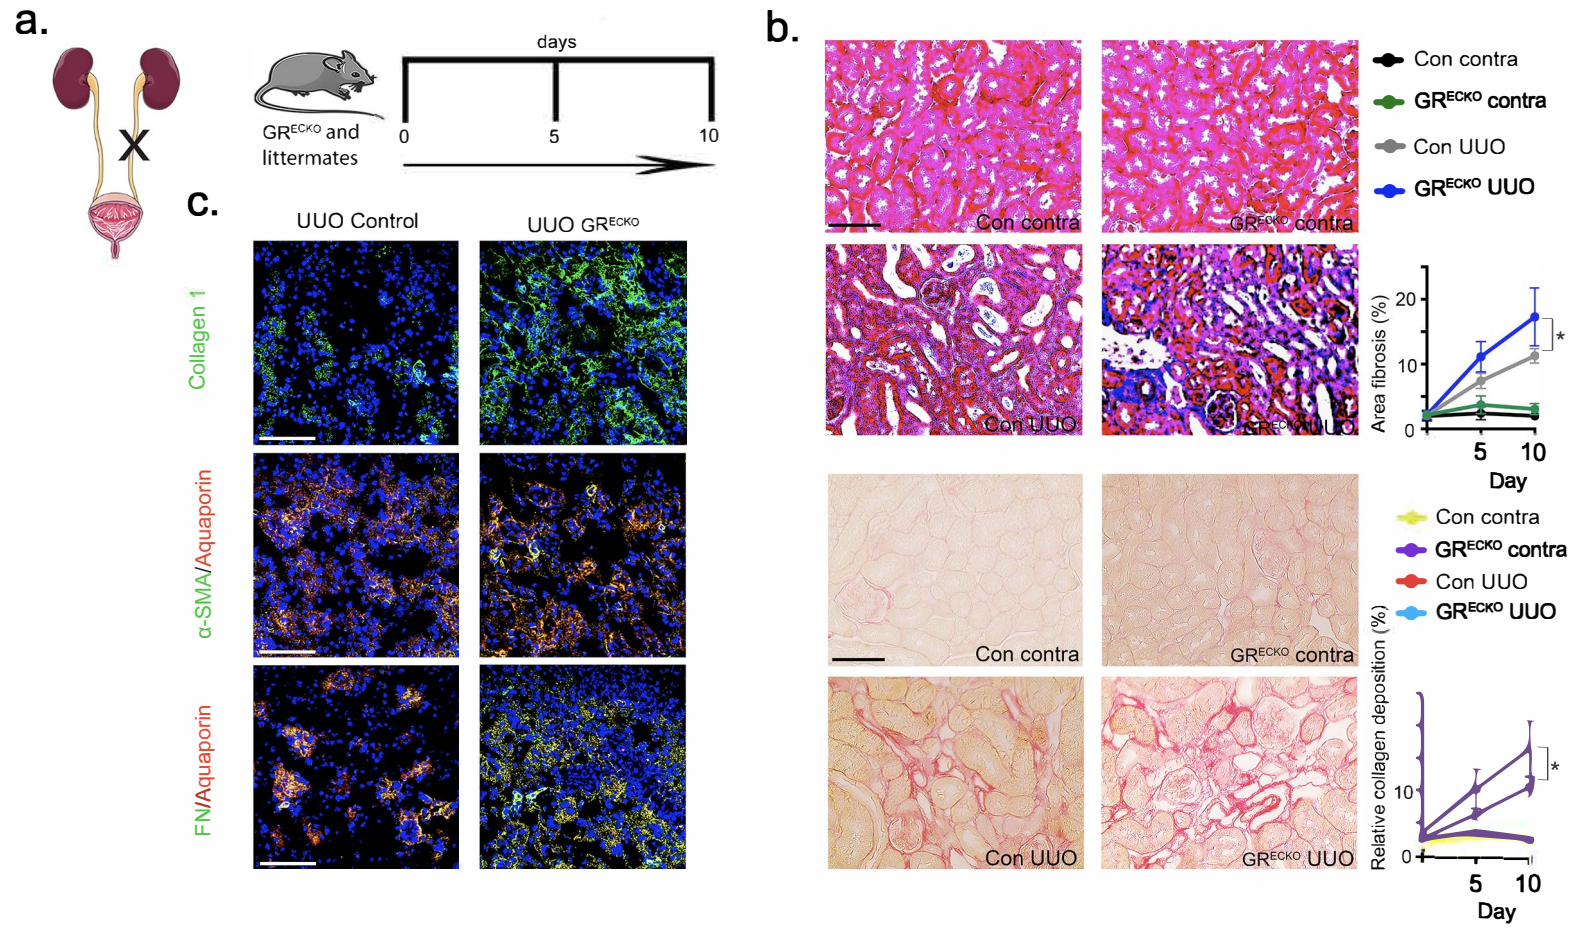

Supplementary Figure 8

**a.**

C57Bl6

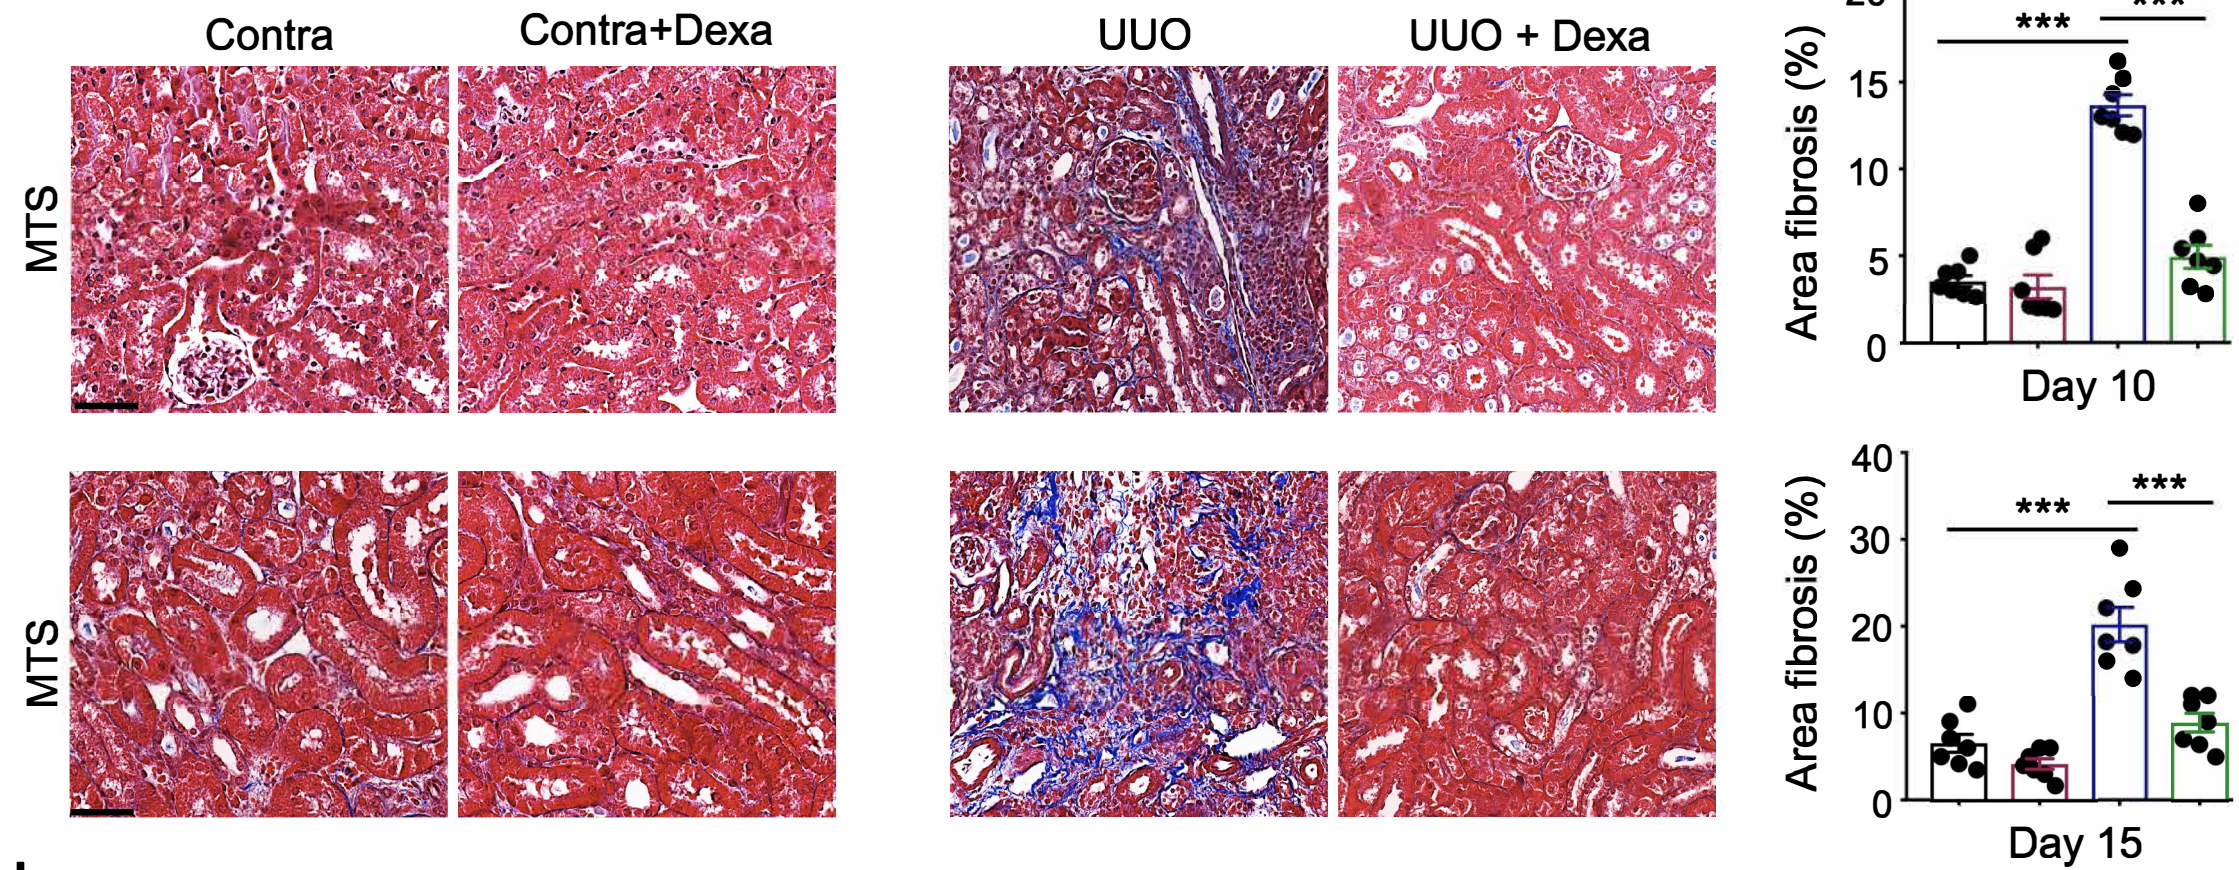**b.**

CD-1

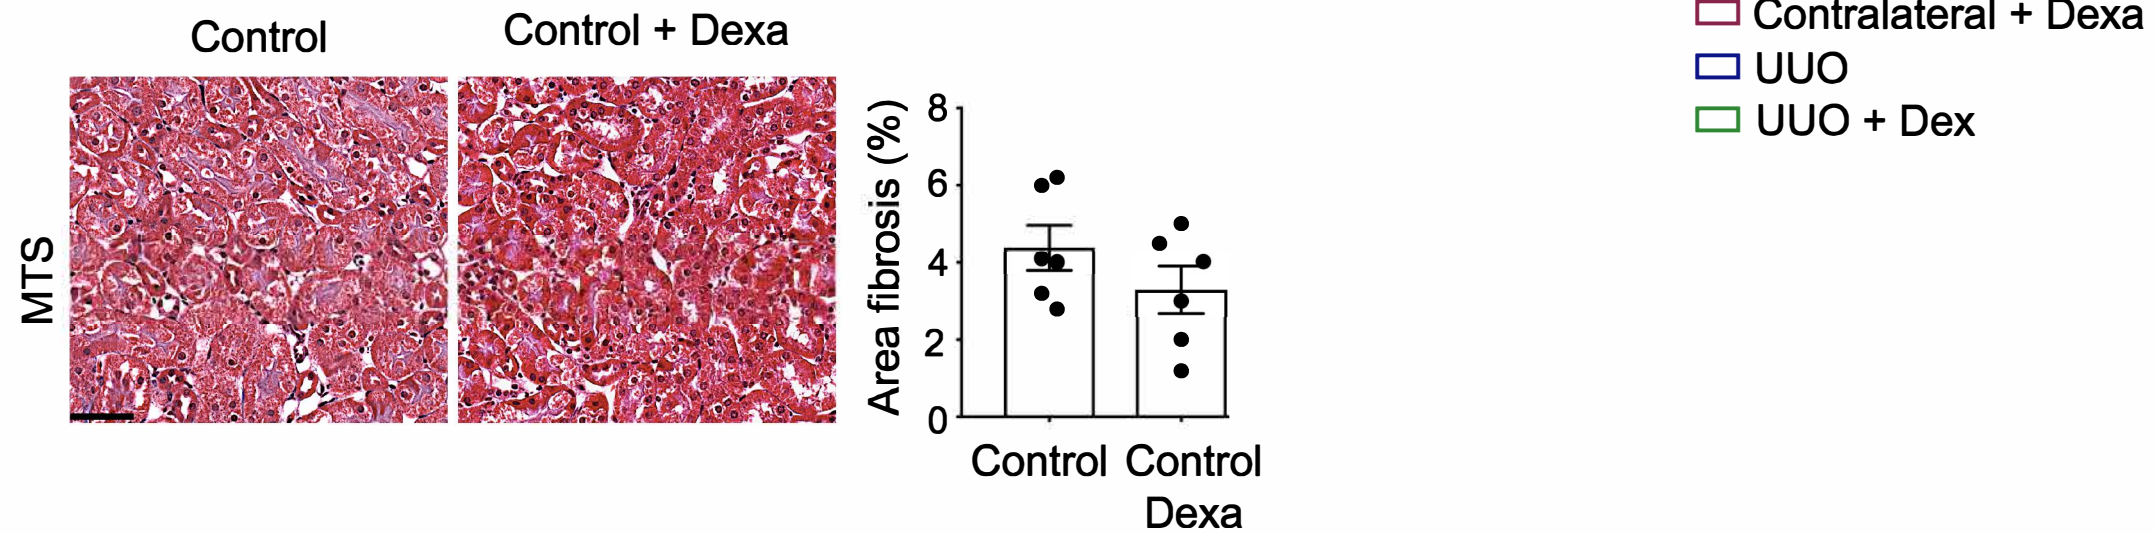

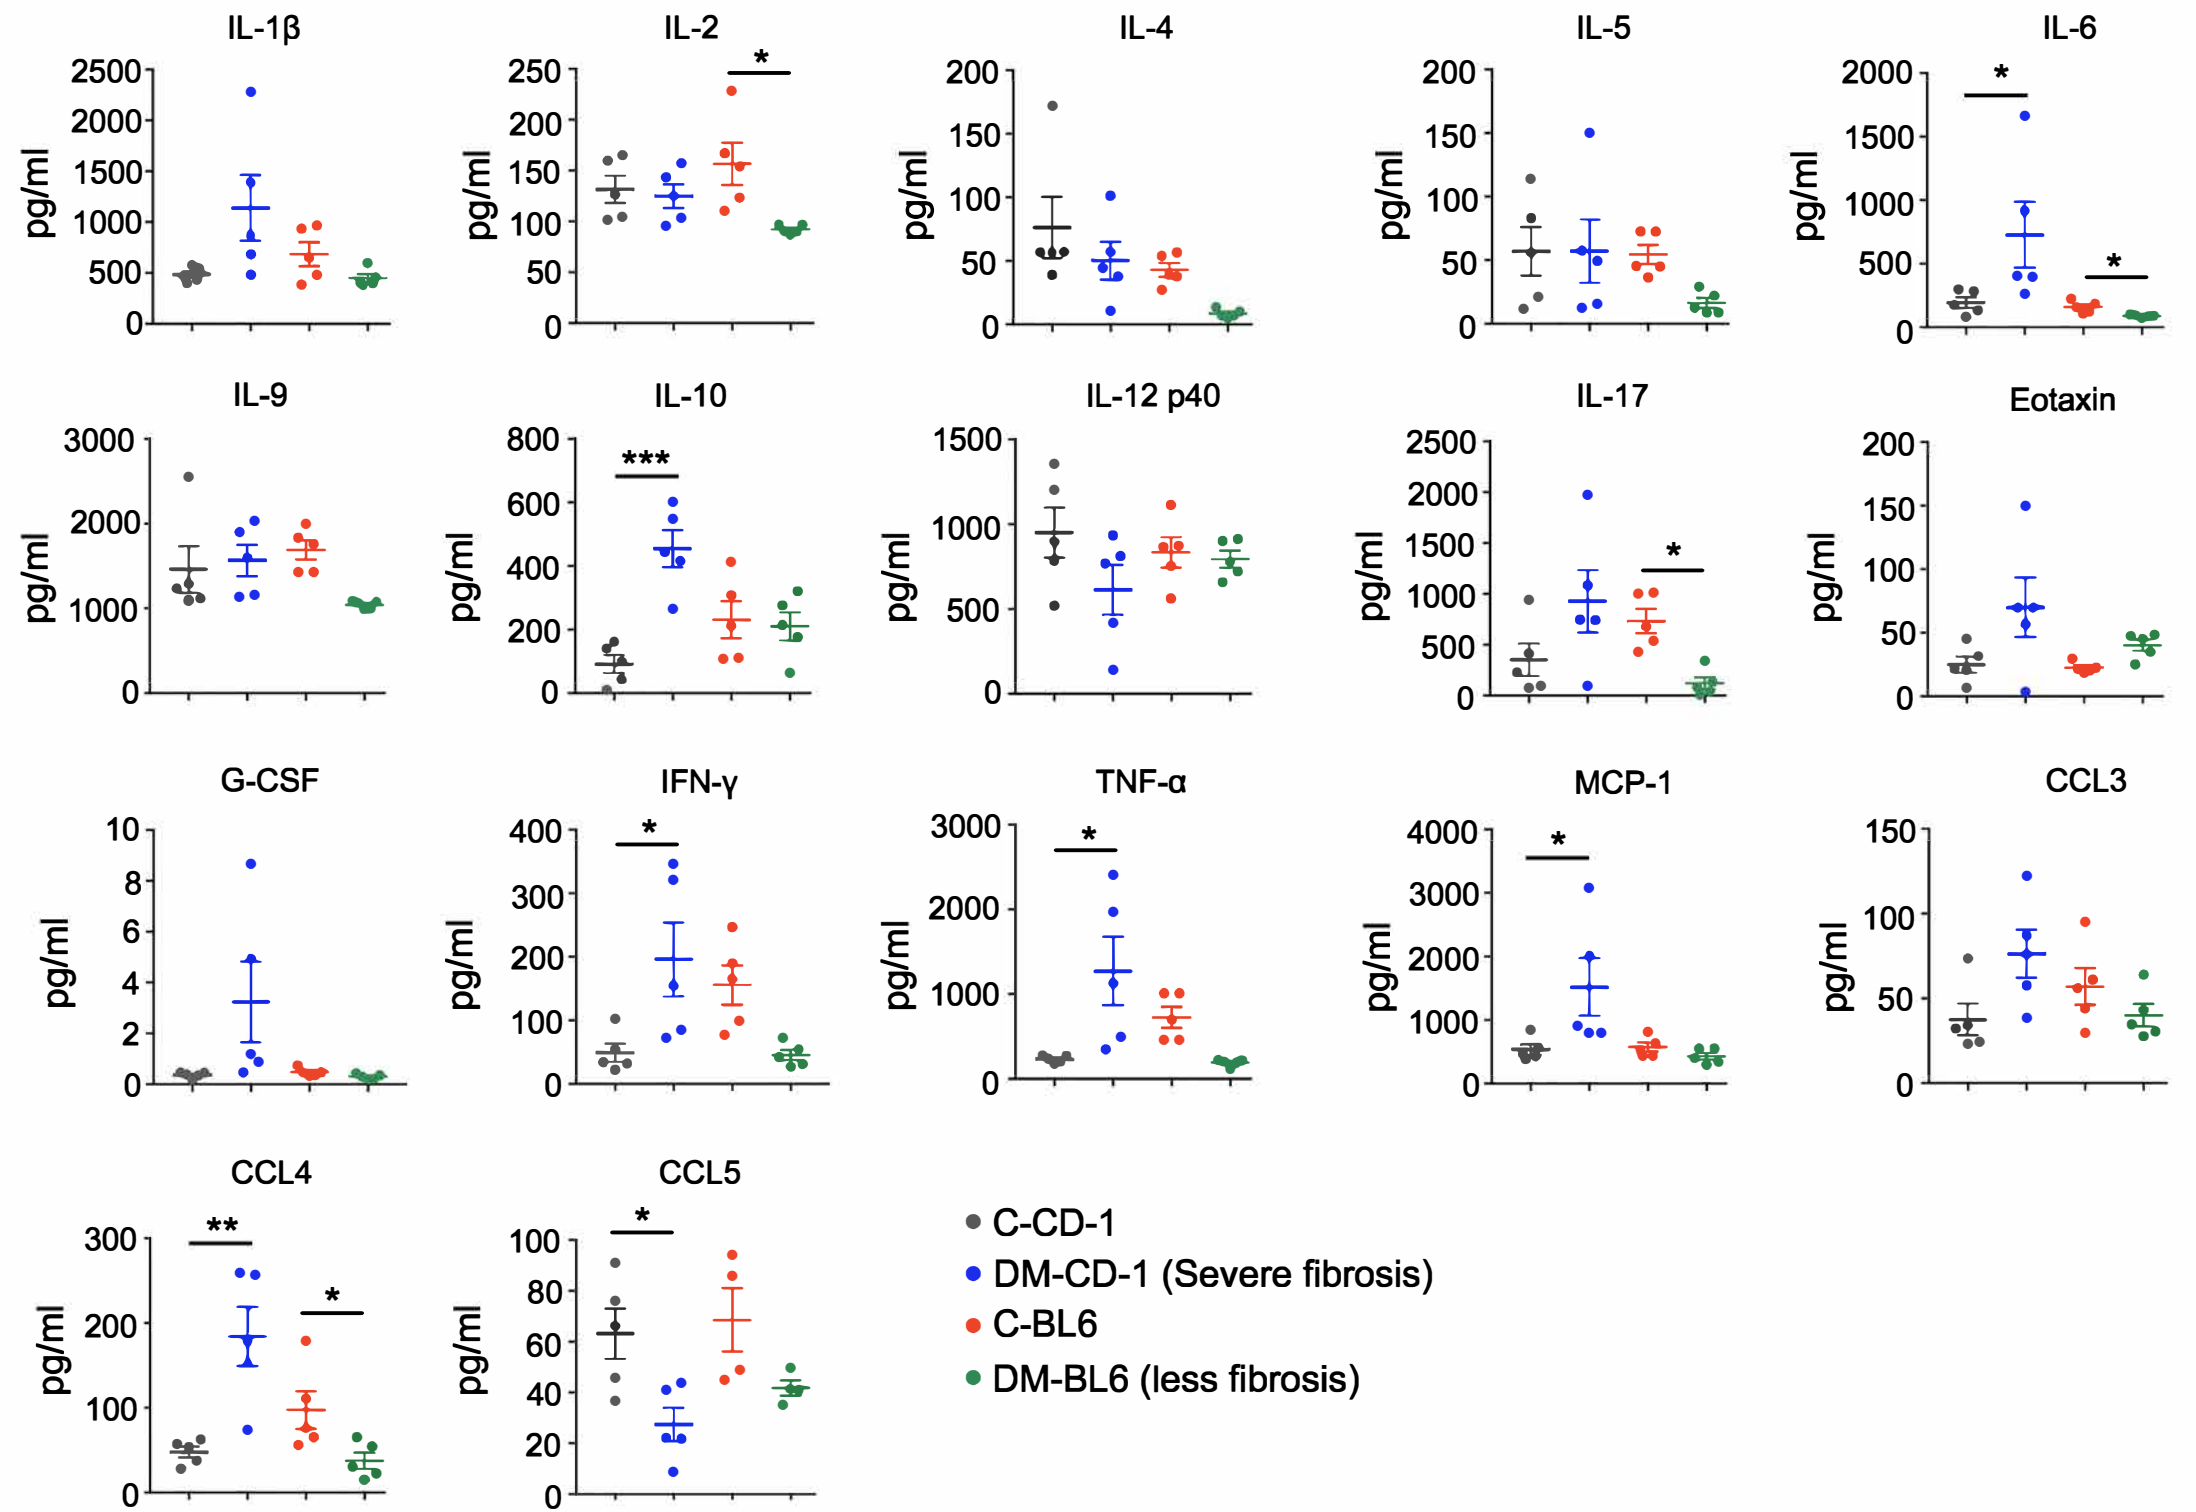

Supplementary Figure 10

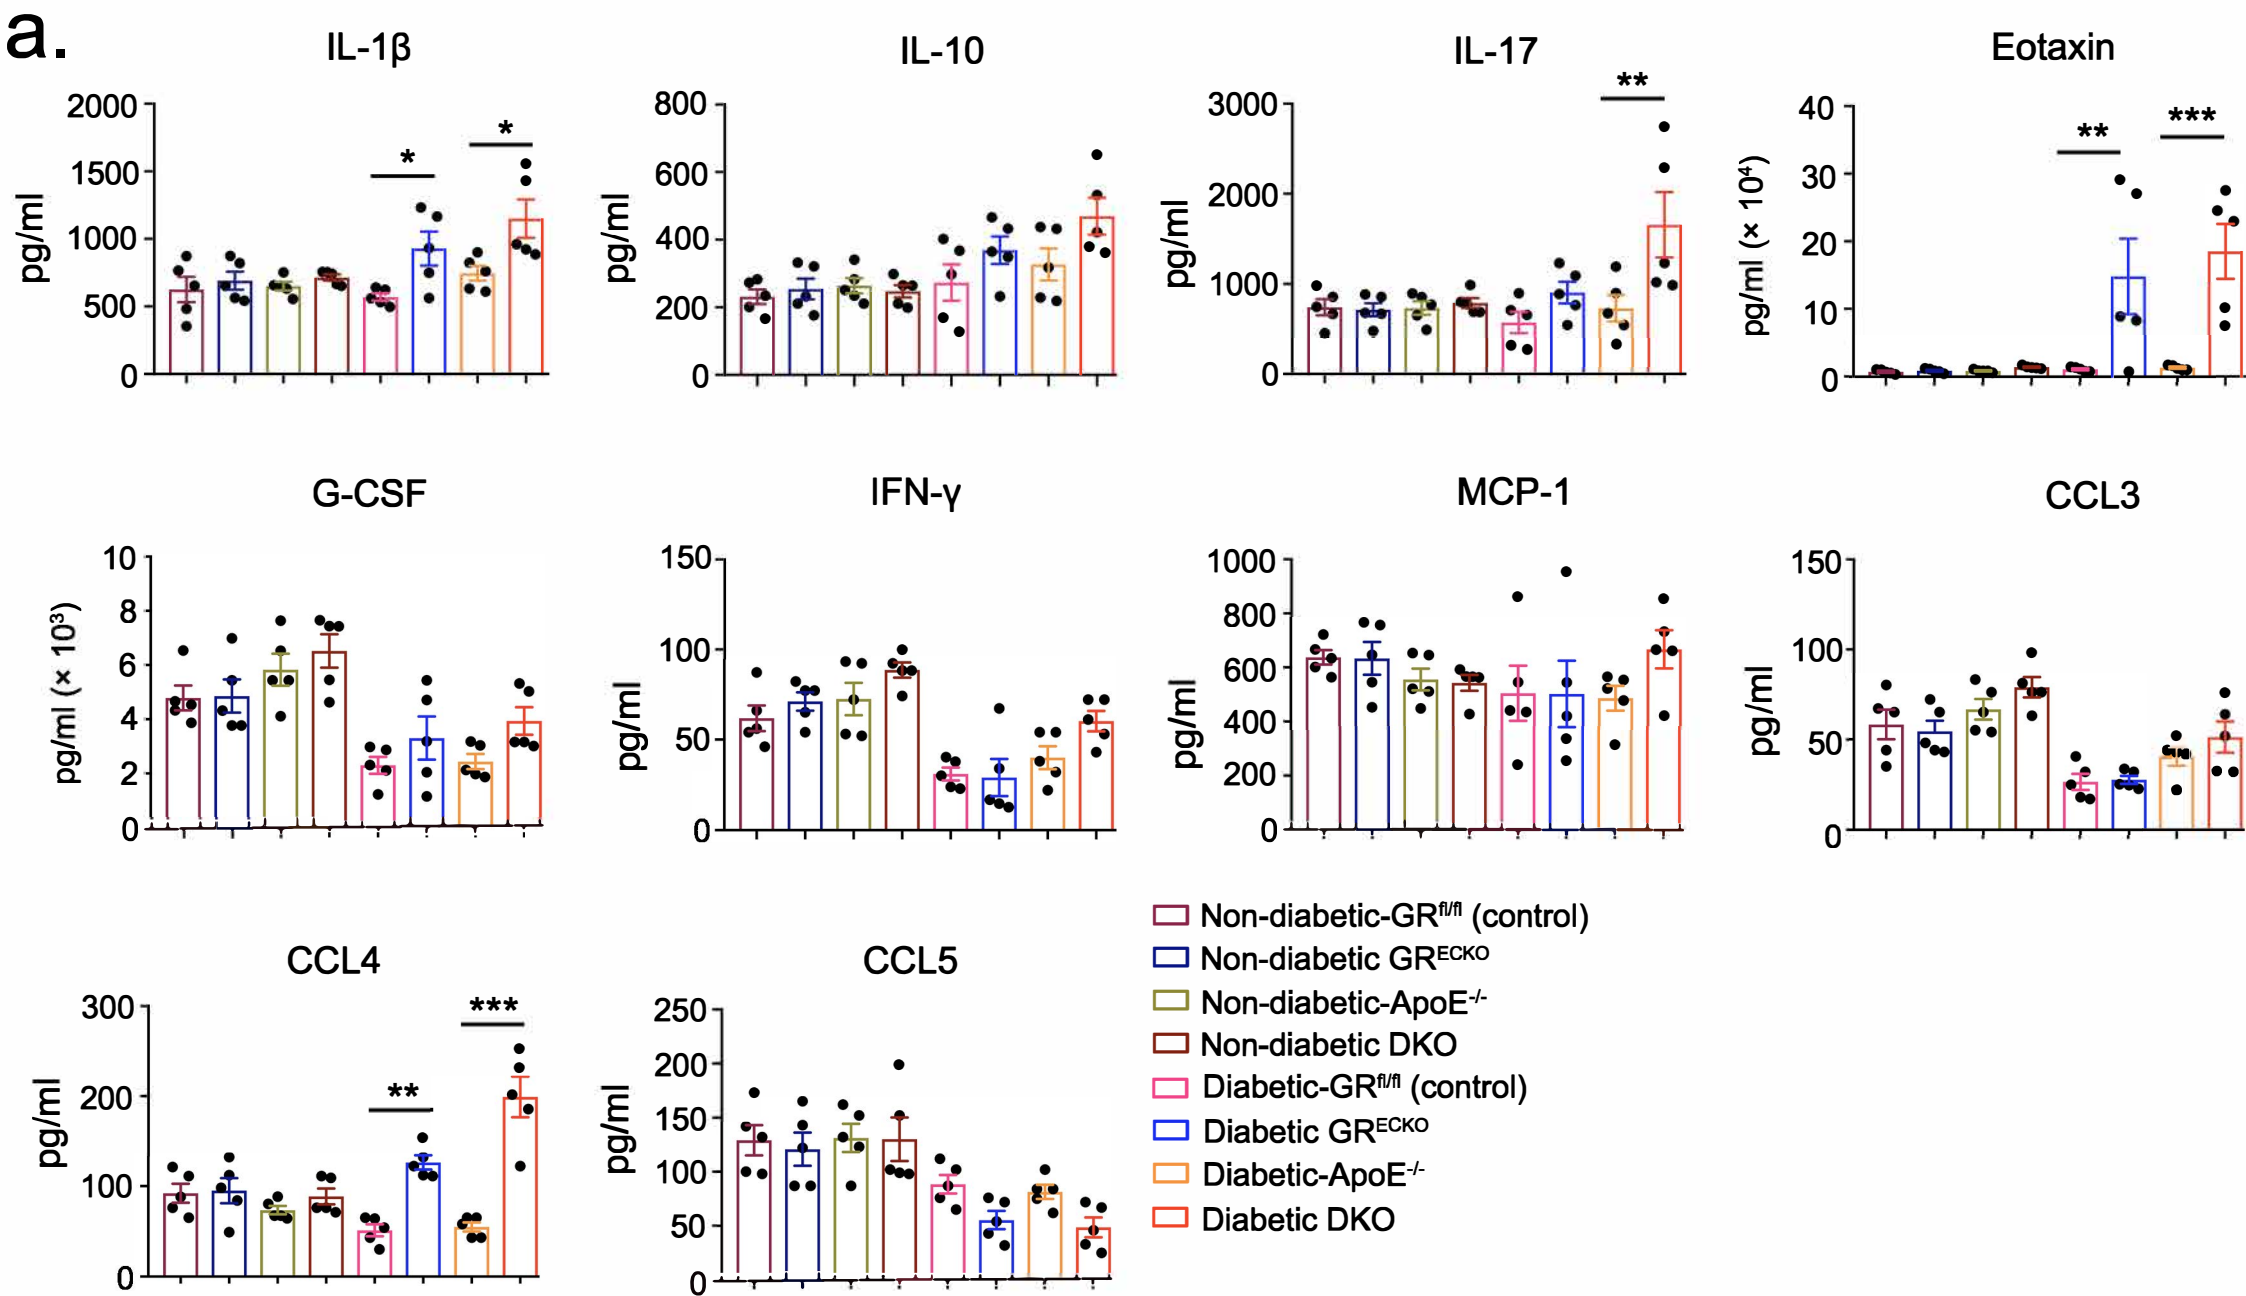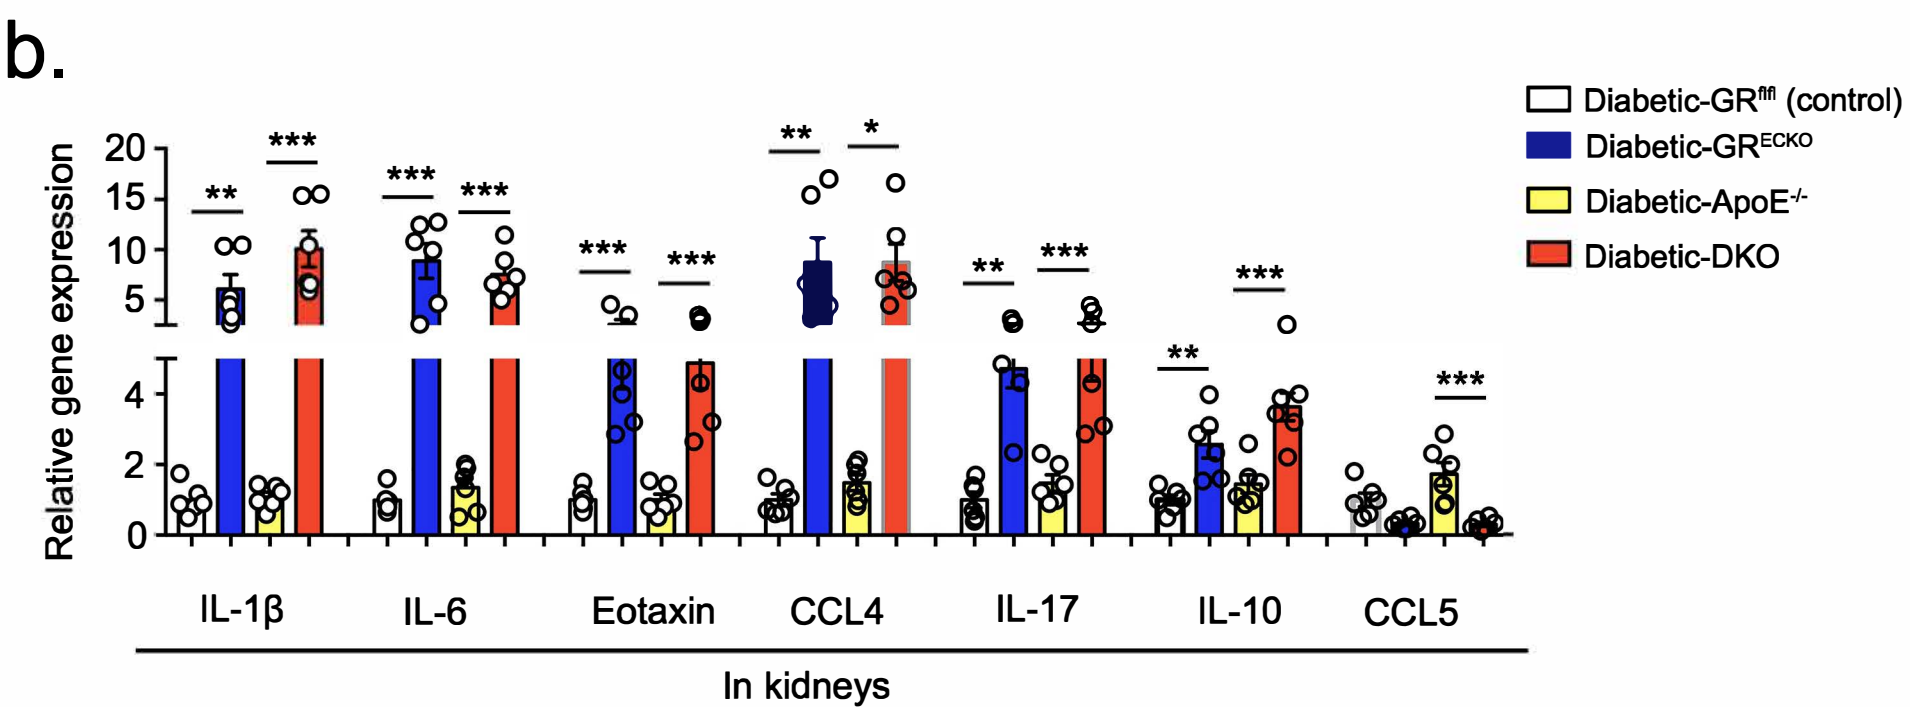



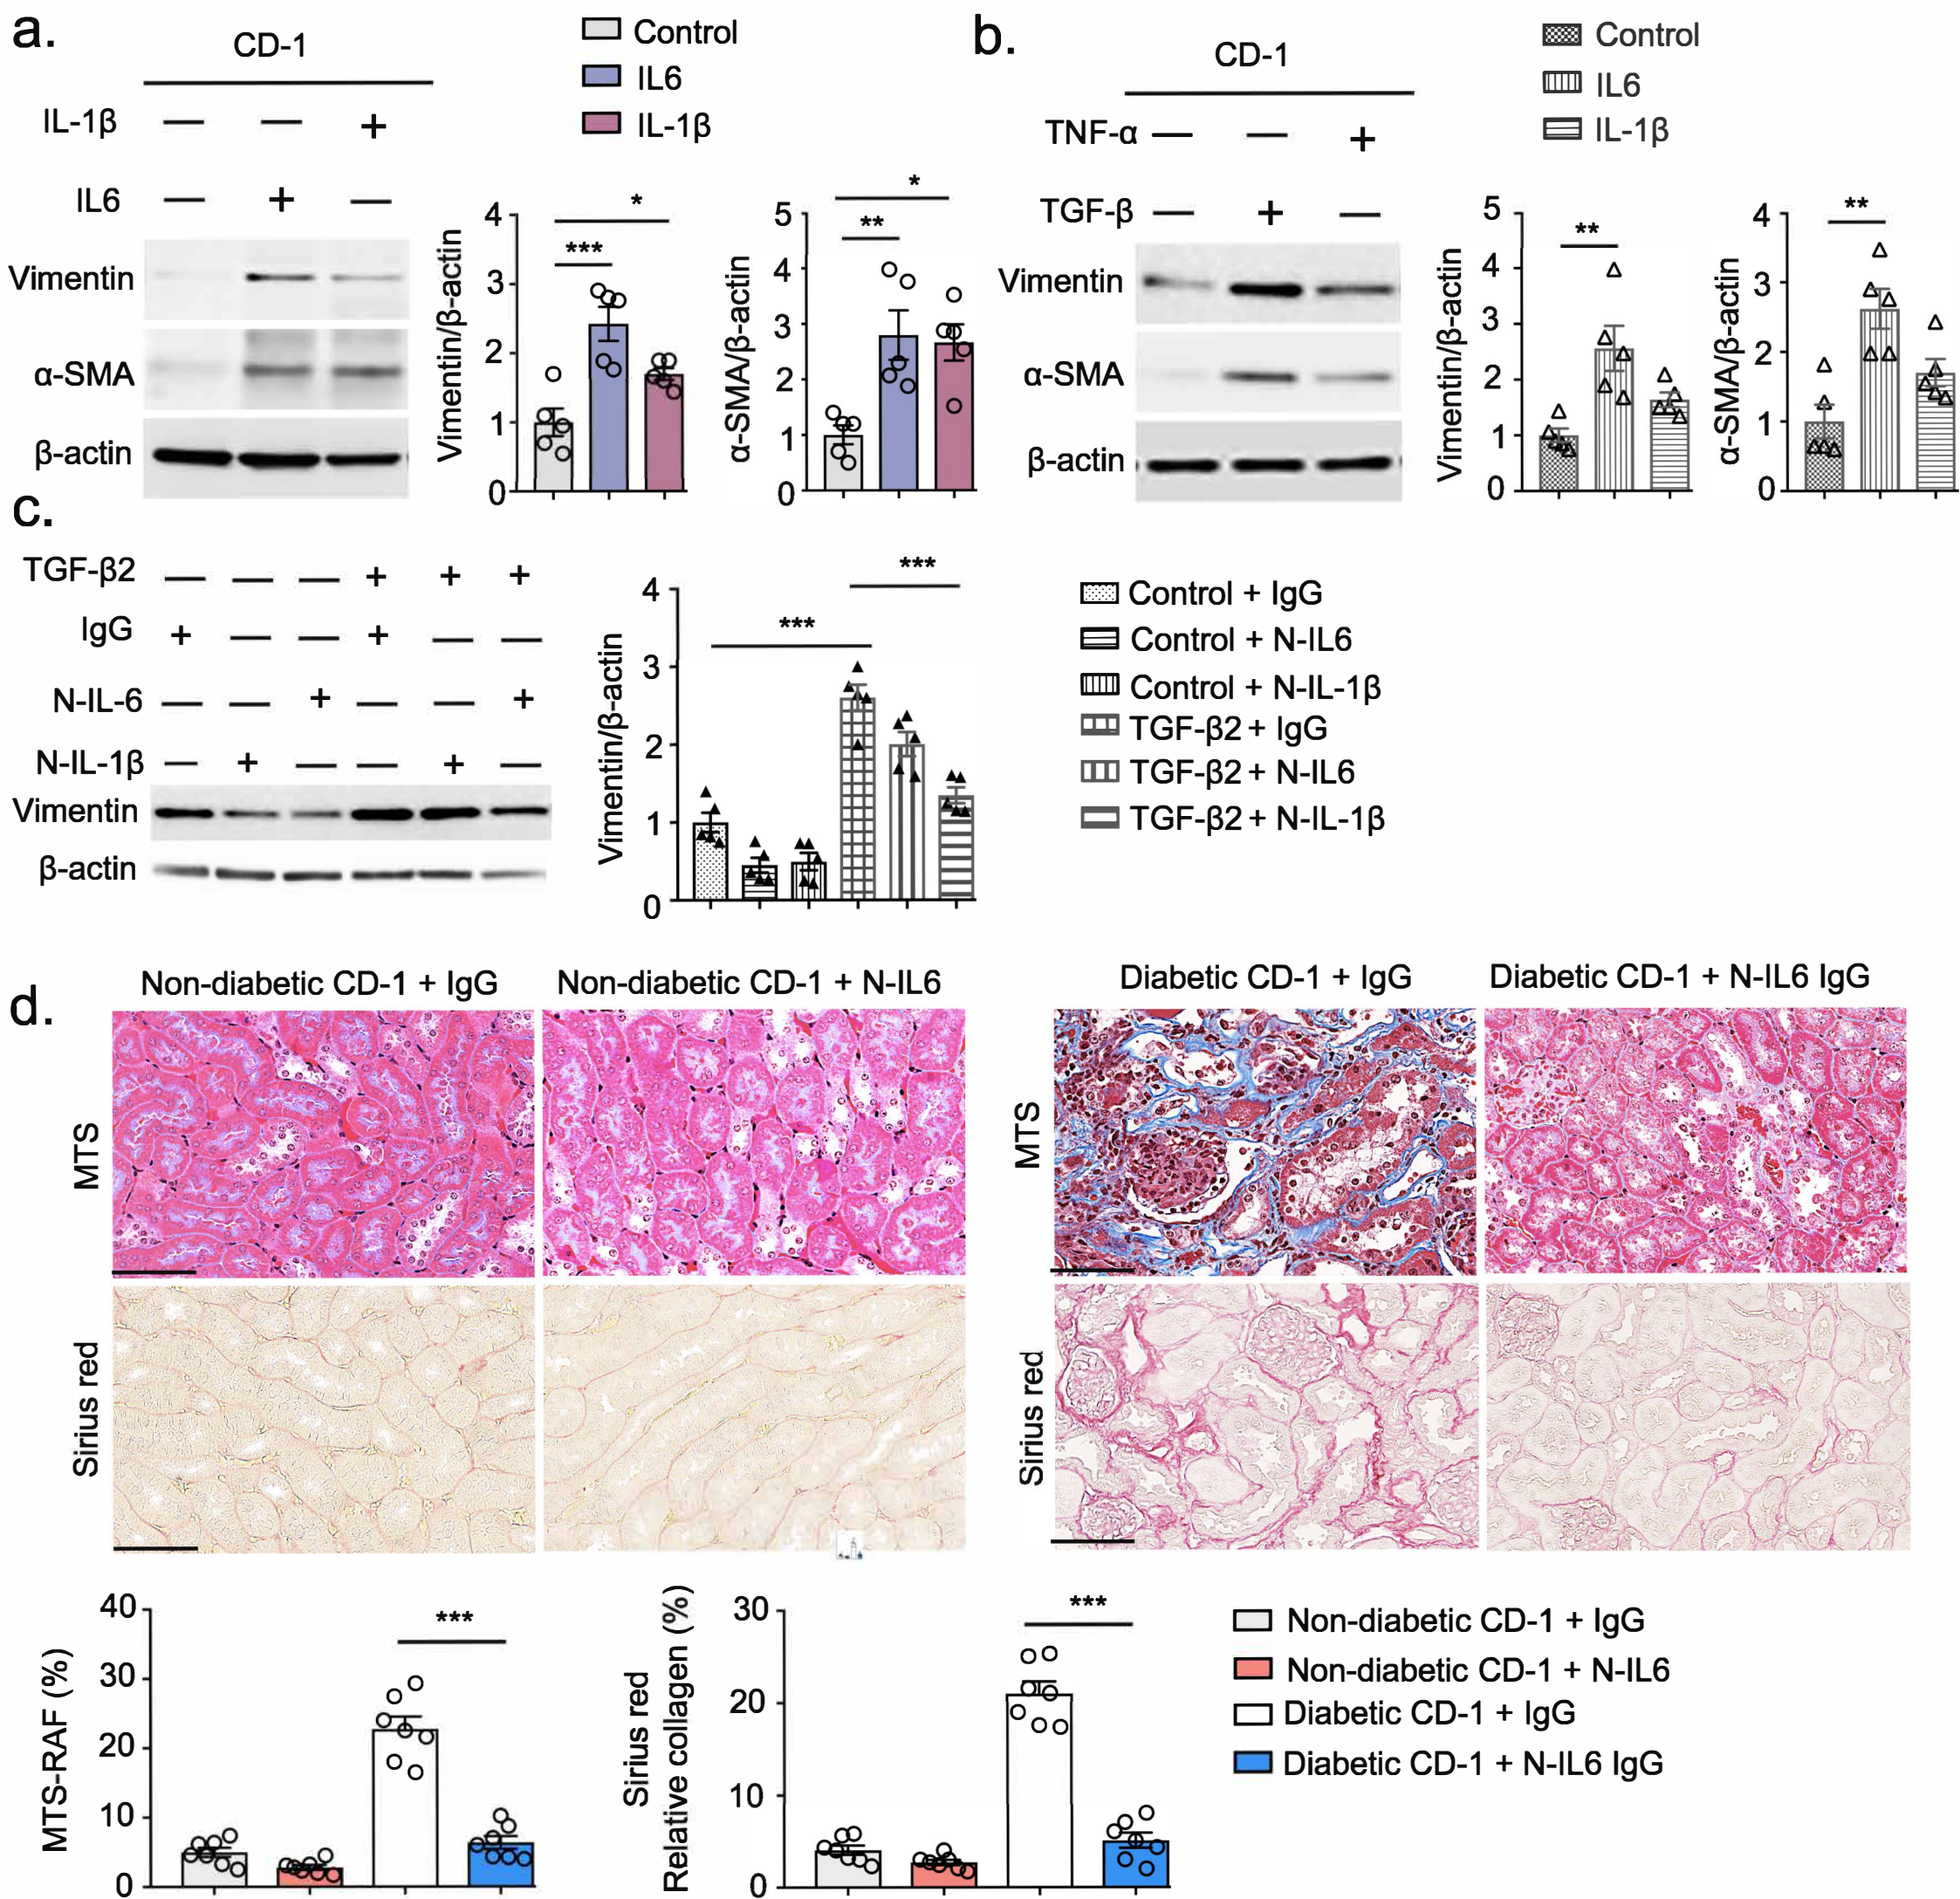

Non-diabetic  $GR^{ECKO}$  + IgG

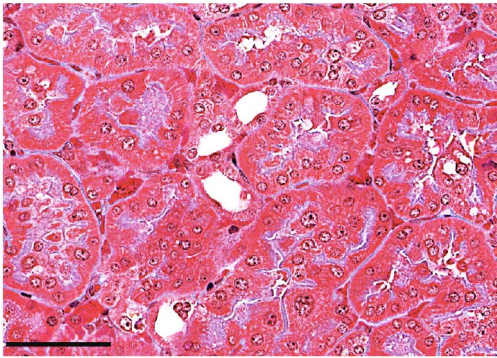

Non-diabetic  $GR^{ECKO}$  + IL-6 IgG

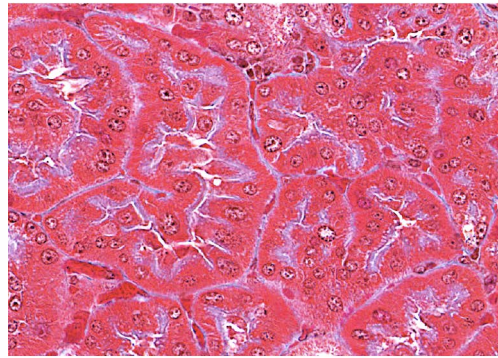

Non-diabetic DKO + IgG

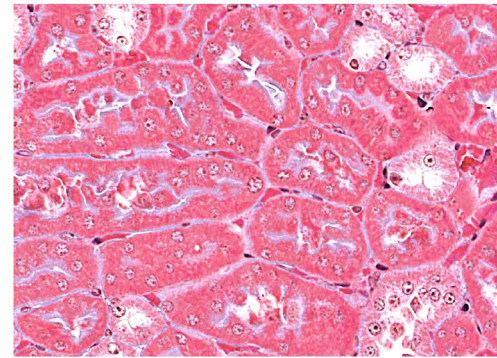

Non-diabetic DKO + IL-6 IgG

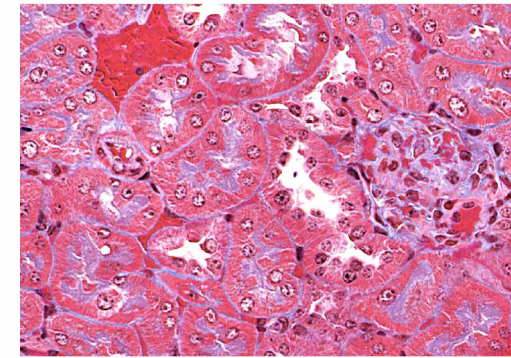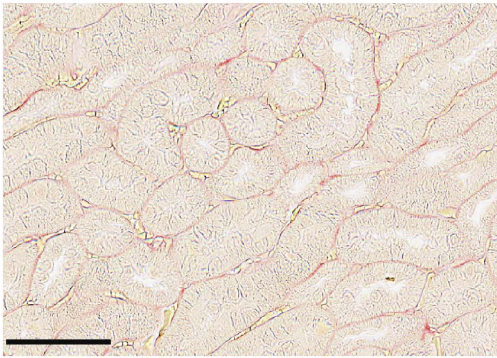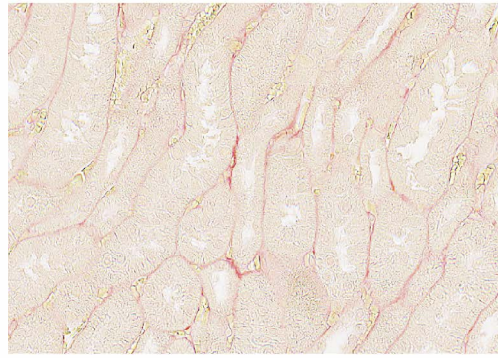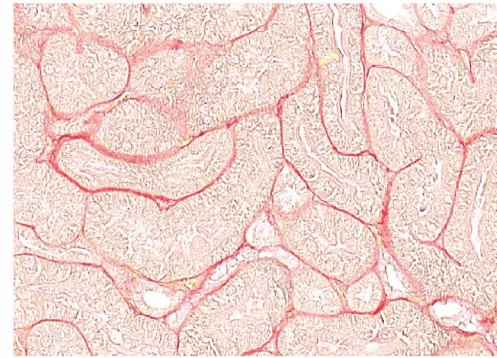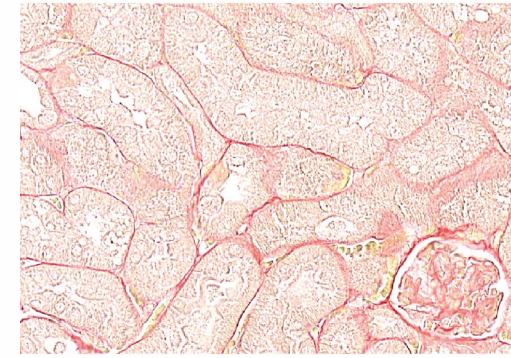

MTS-Area Fibrosis (%)

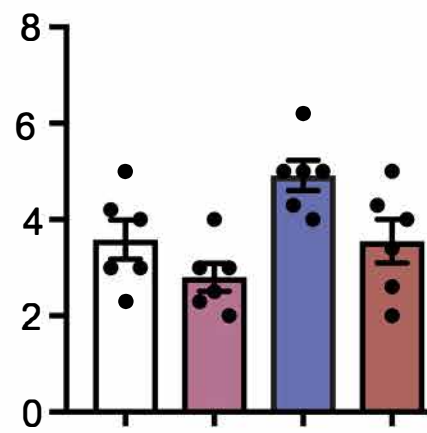

Sirius red-Collagen deposition (%)

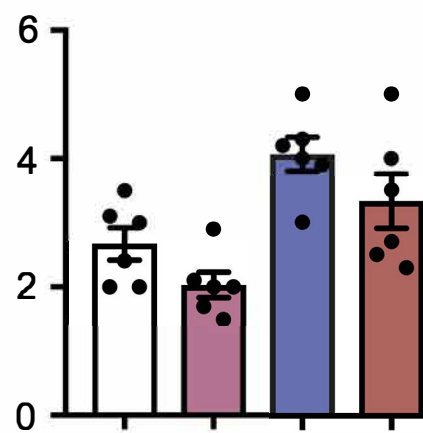

- Non-diabetic  $GR^{ECKO}$  + IgG
- Non-diabetic  $GR^{ECKO}$  + IL-6 IgG
- Non-diabetic DKO + IgG
- Non-diabetic DKO + IL-6 IgG

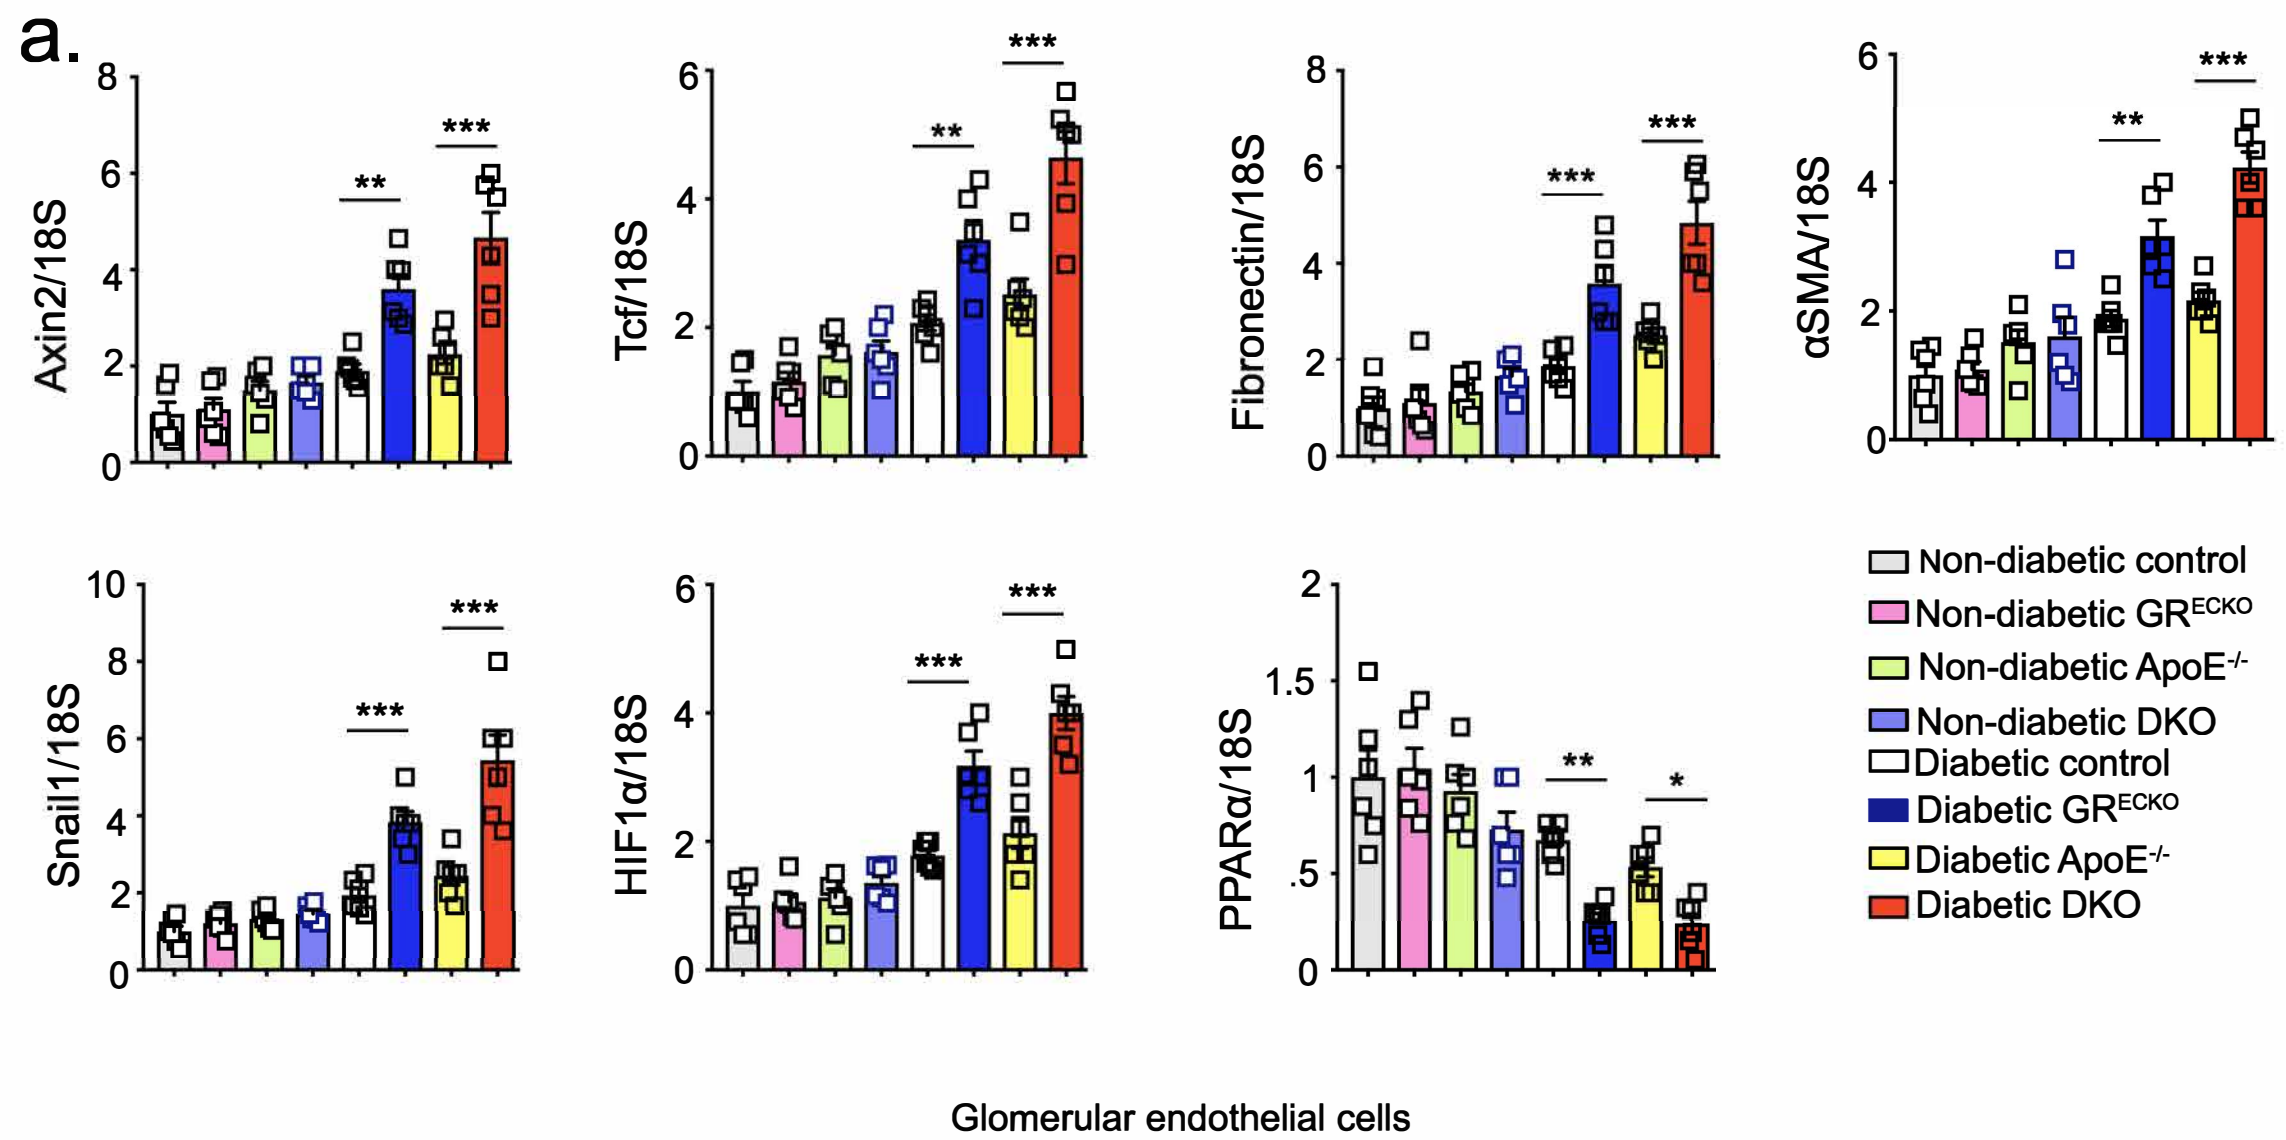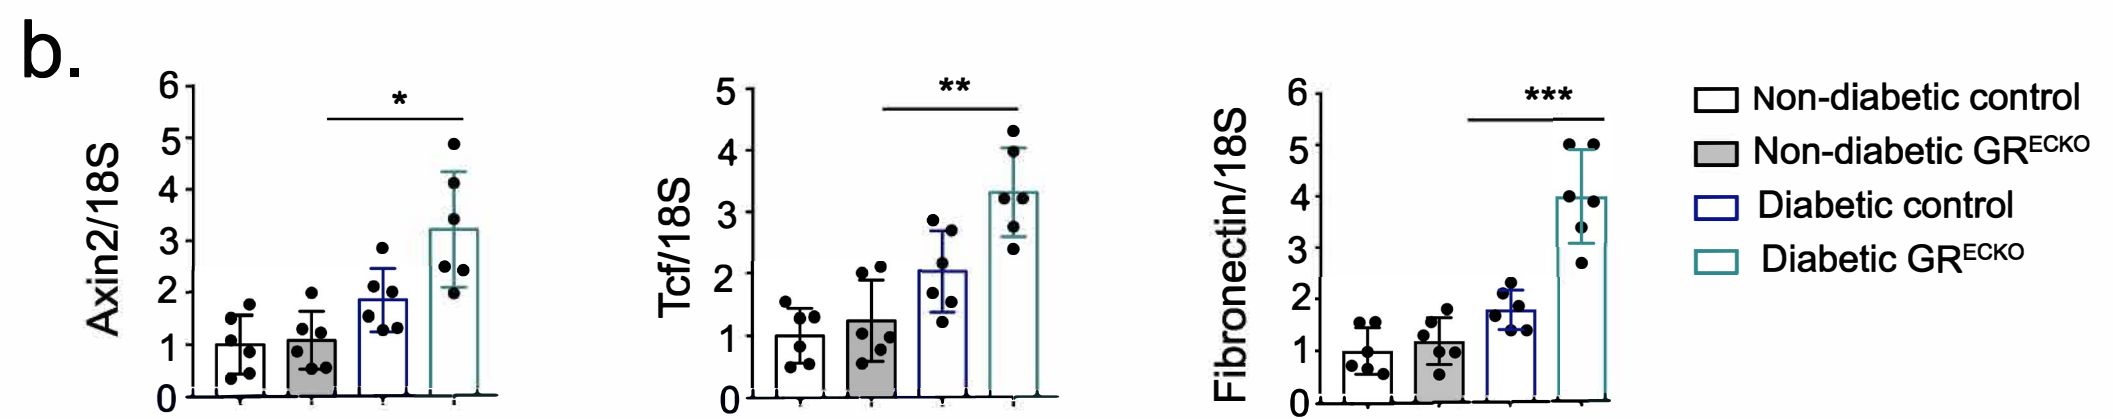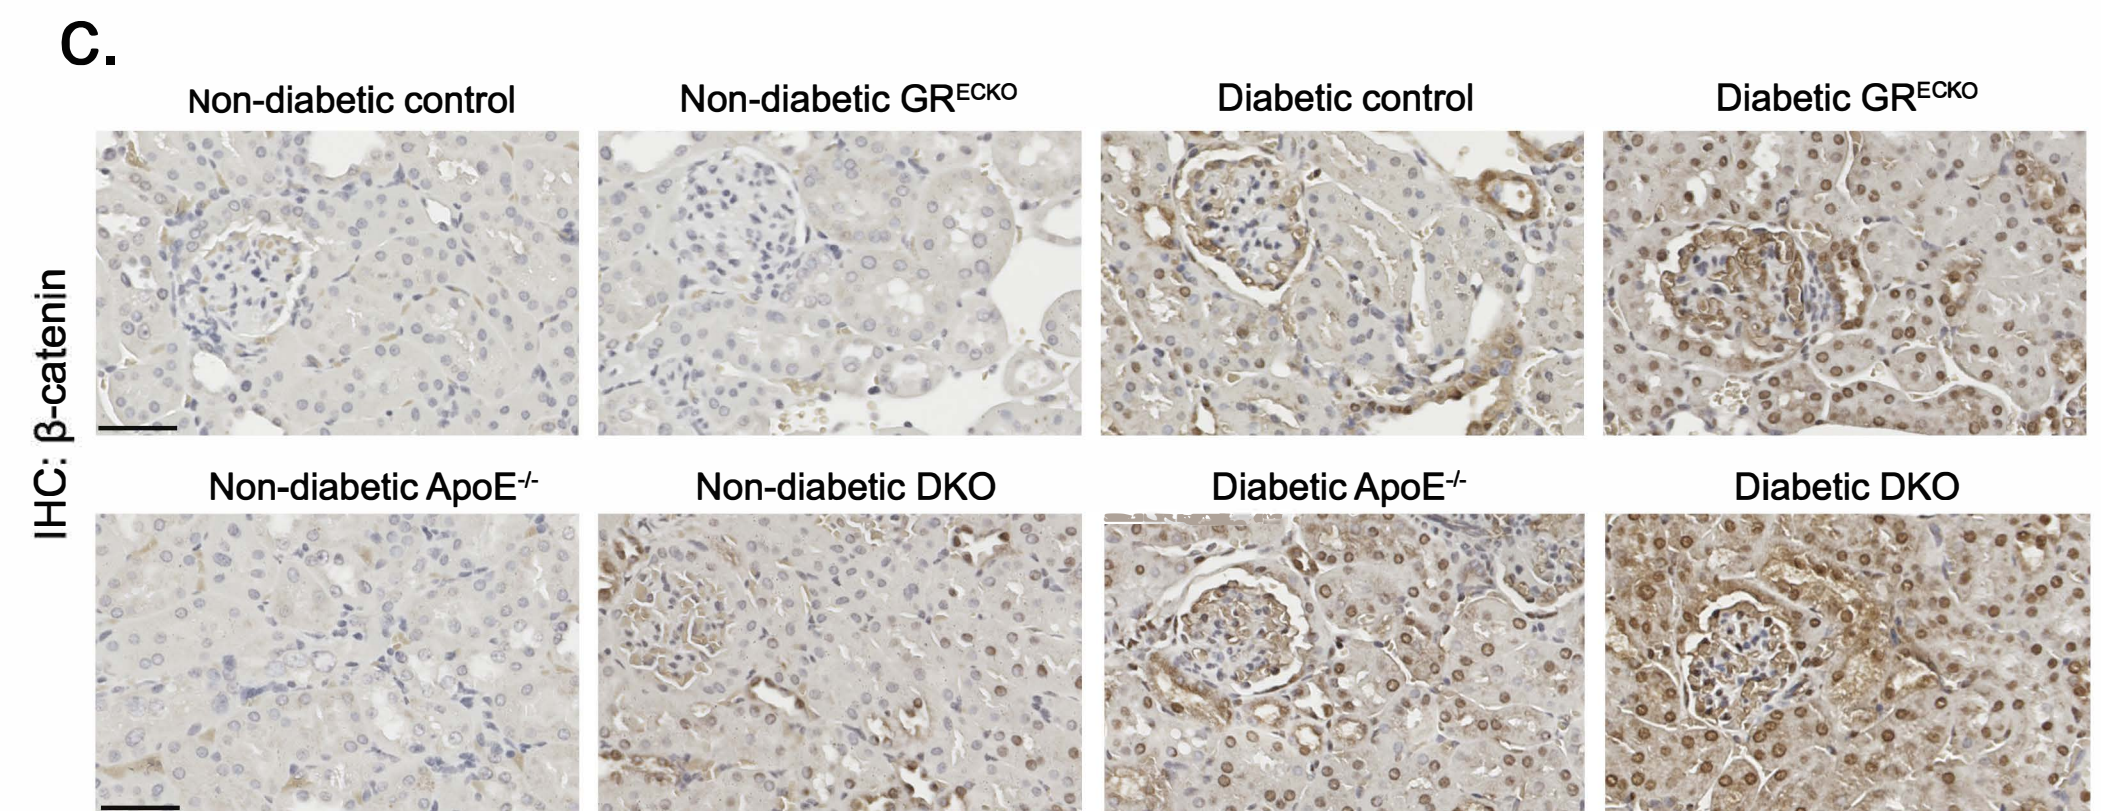

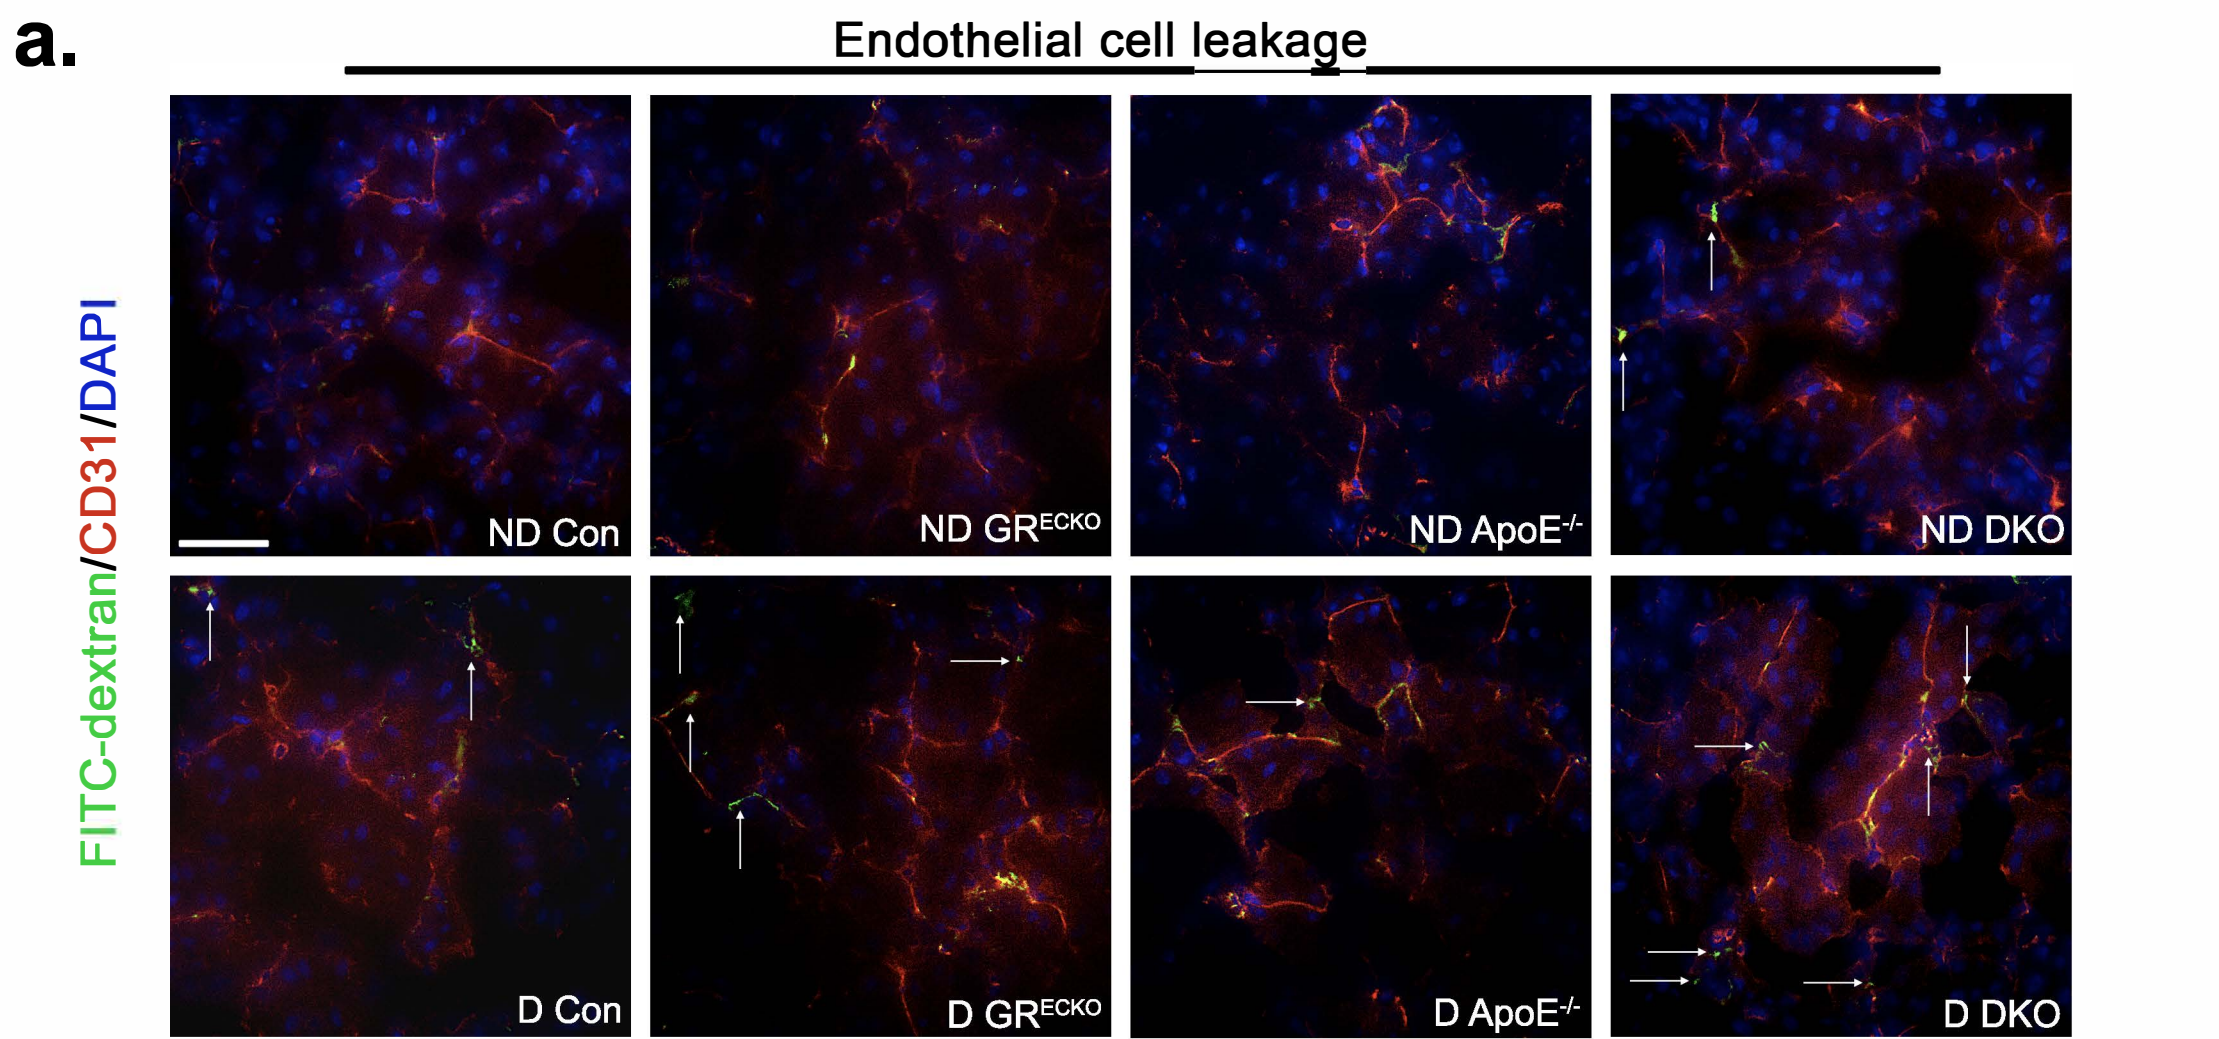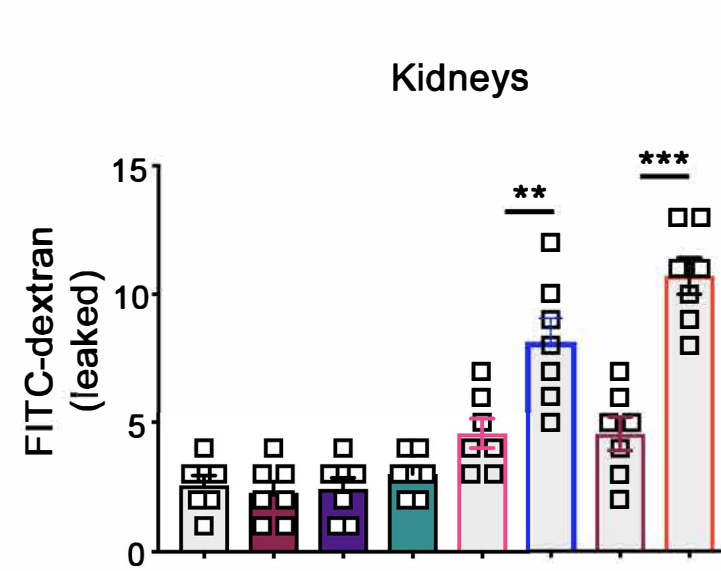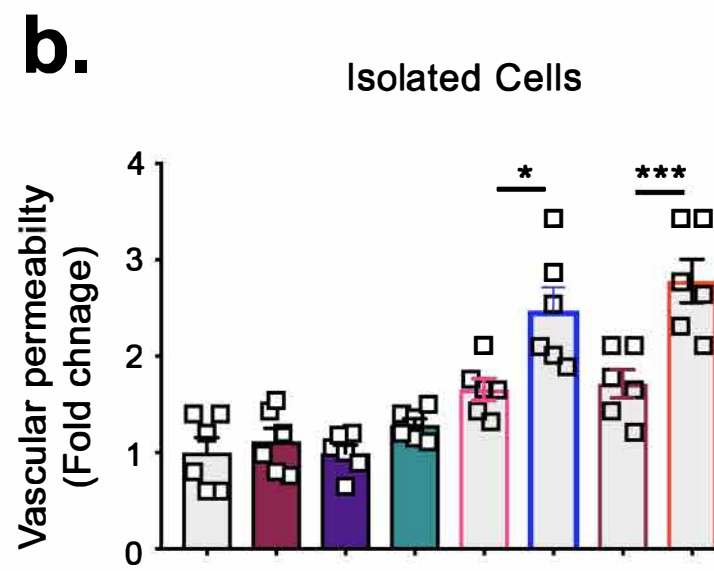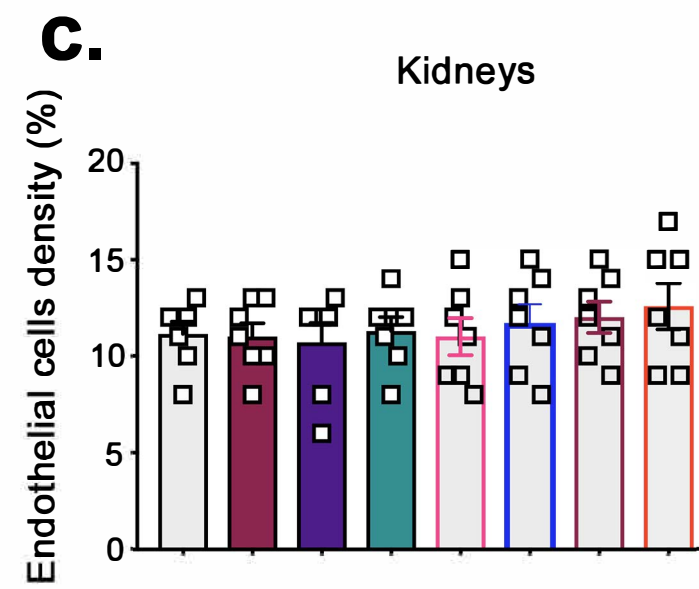

- Non-diabetic Control
- Non-diabetic GR<sup>ECKO</sup>
- Non-diabetic ApoE<sup>-/-</sup>
- Non-diabetic DKO
- Diabetic Control
- Diabetic GR<sup>ECKO</sup>
- Diabetic ApoE<sup>-/-</sup>
- Diabetic DKO

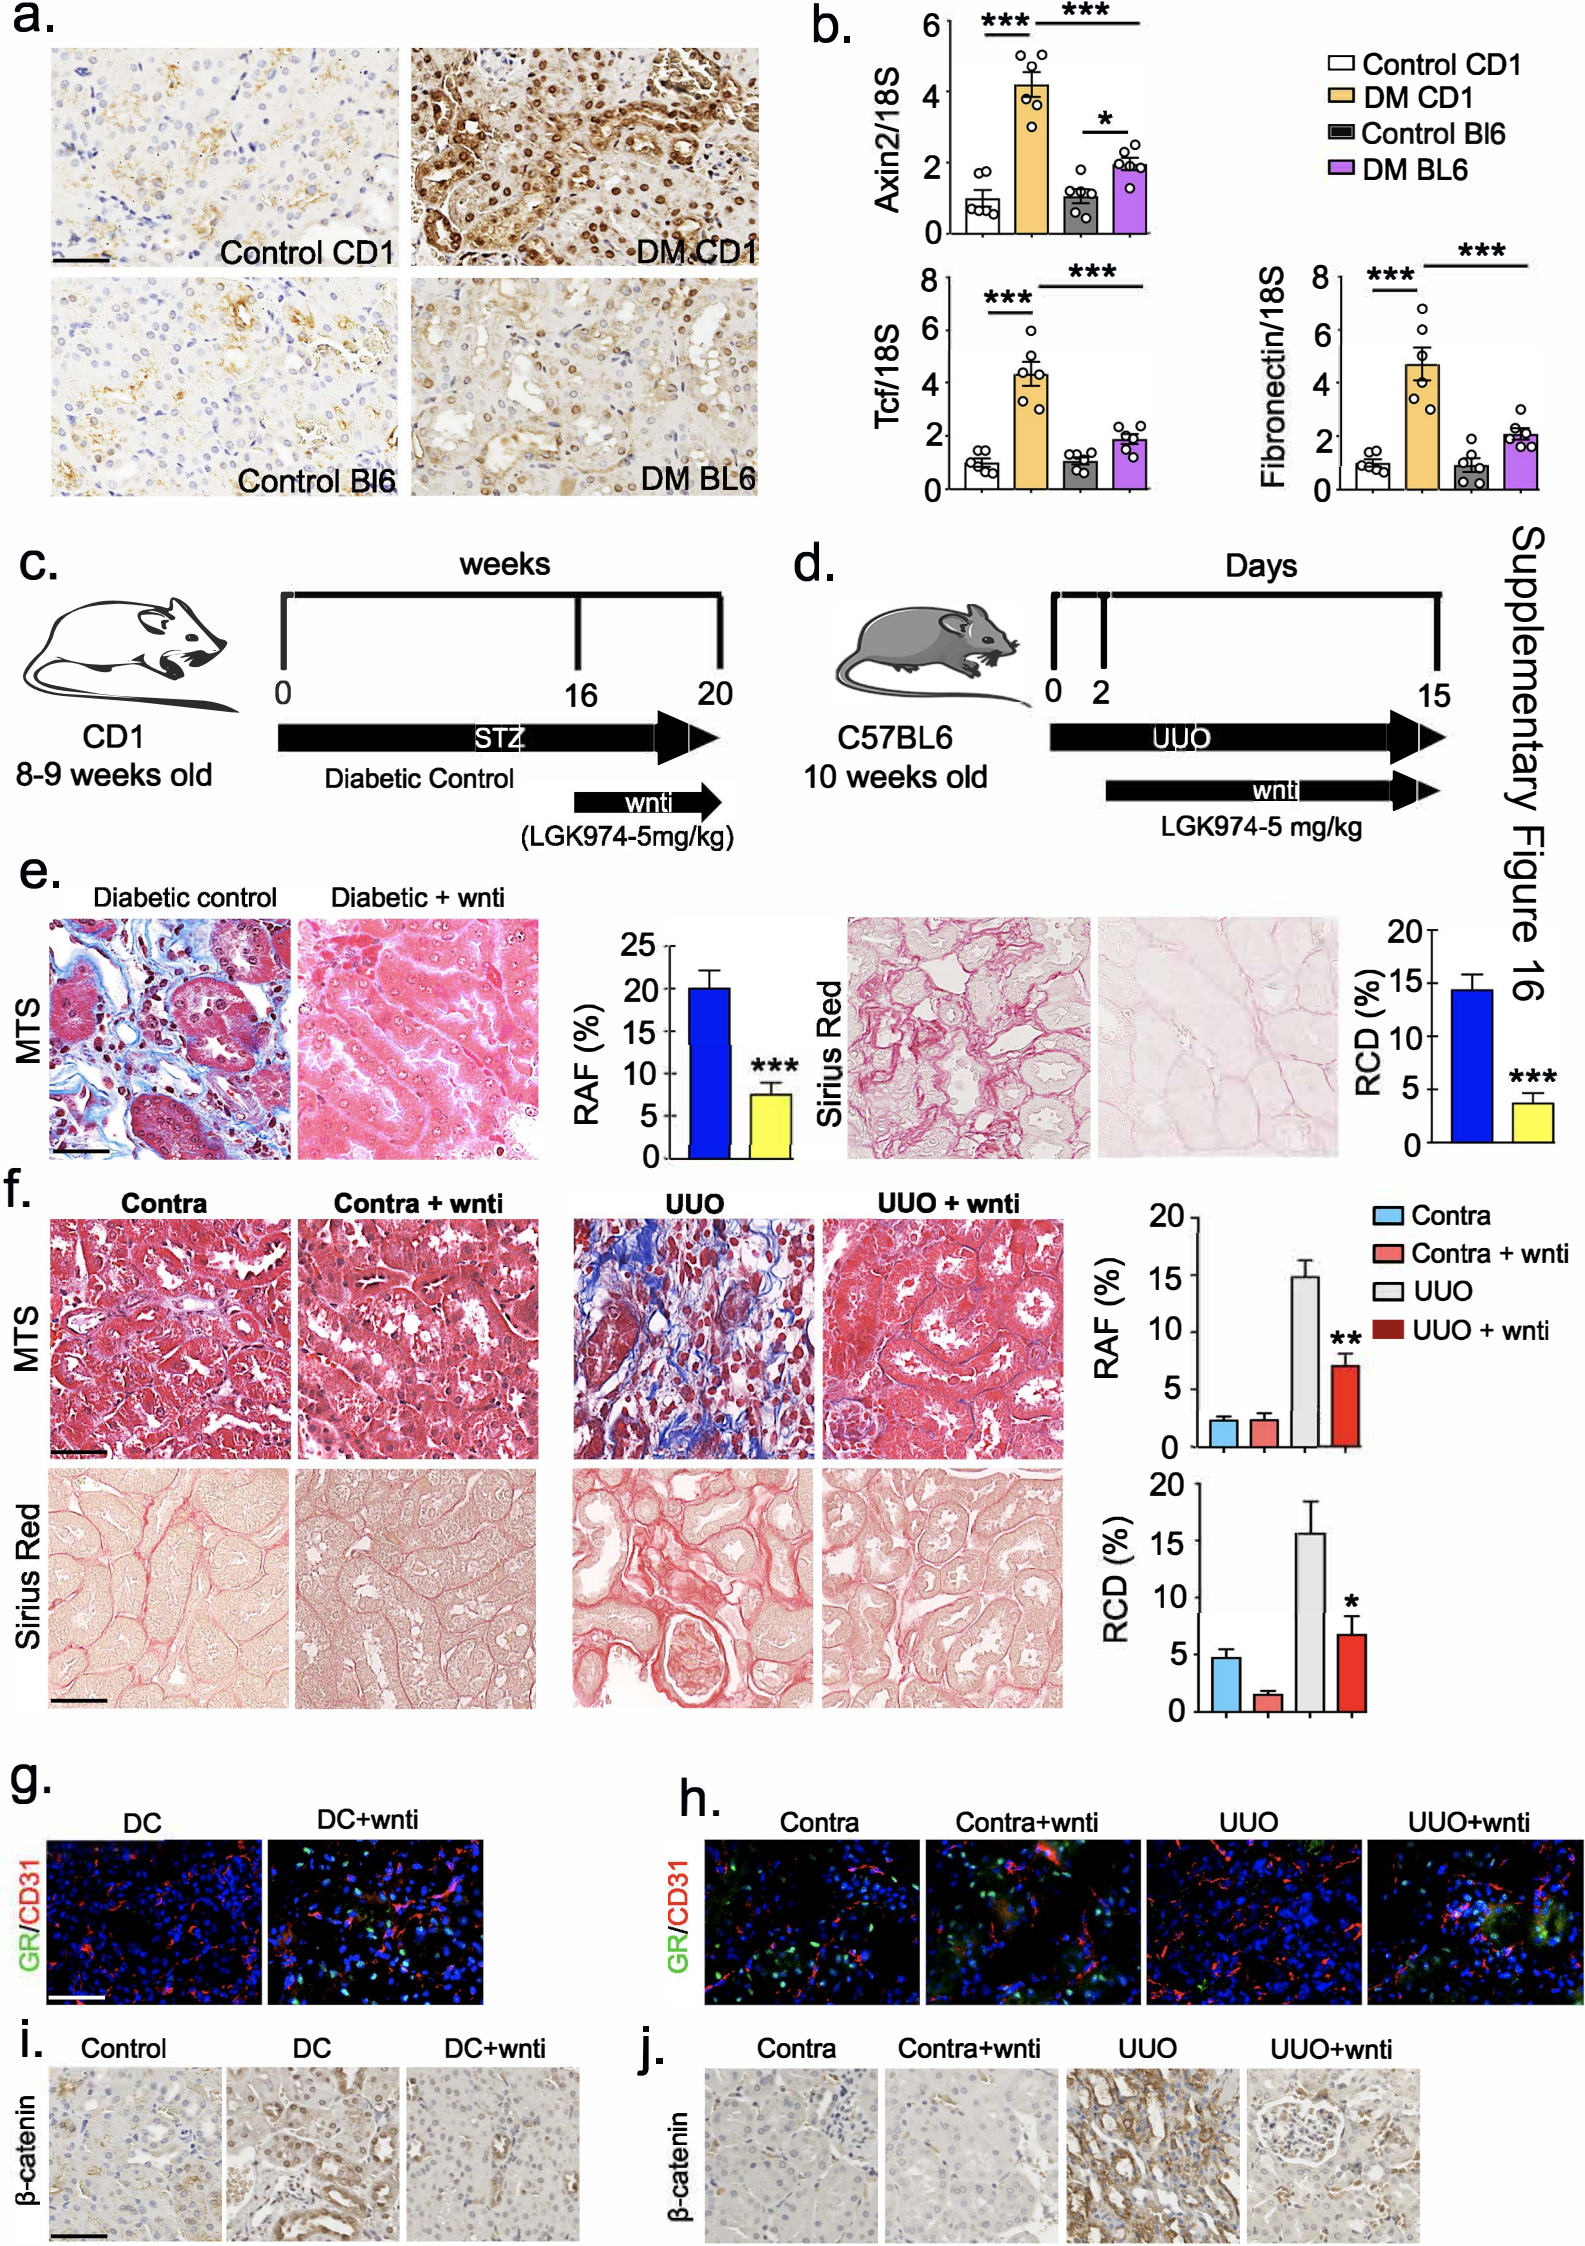

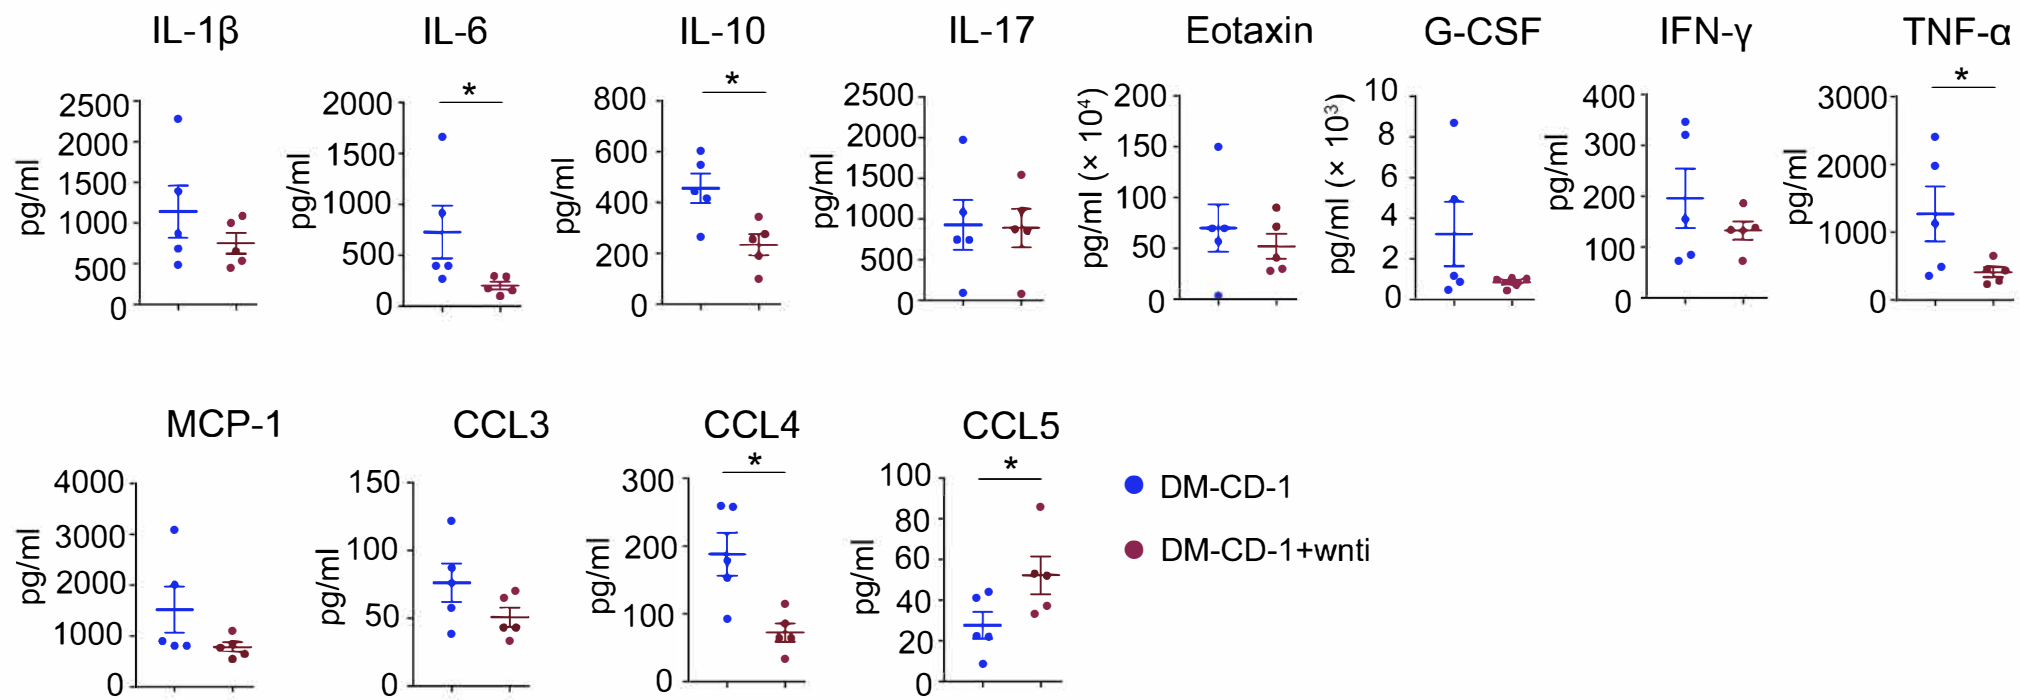

Supplementary Figure 17

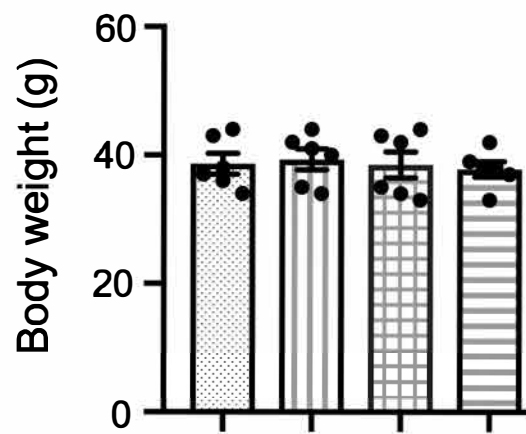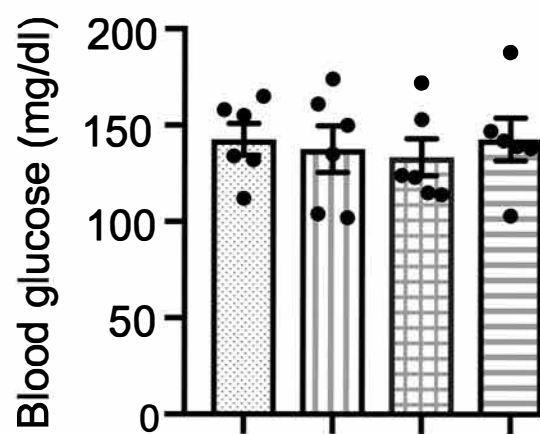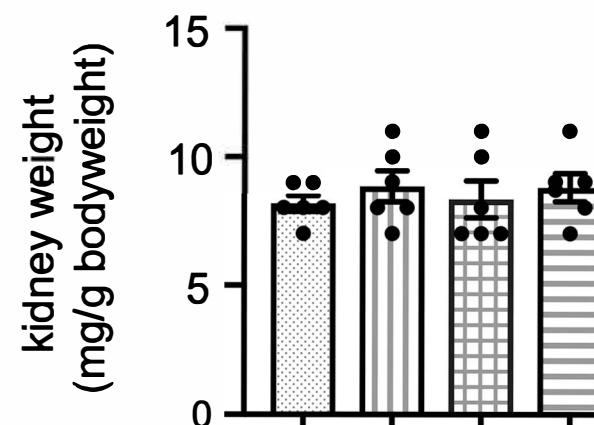

- ▨ Nondiabetic control
- ▨ Nondiabetic control + Wnt1
- ▨ Nondiabetic GR<sup>ECKO</sup>
- ▨ Nondiabetic GR<sup>ECKO</sup> + Wnt1

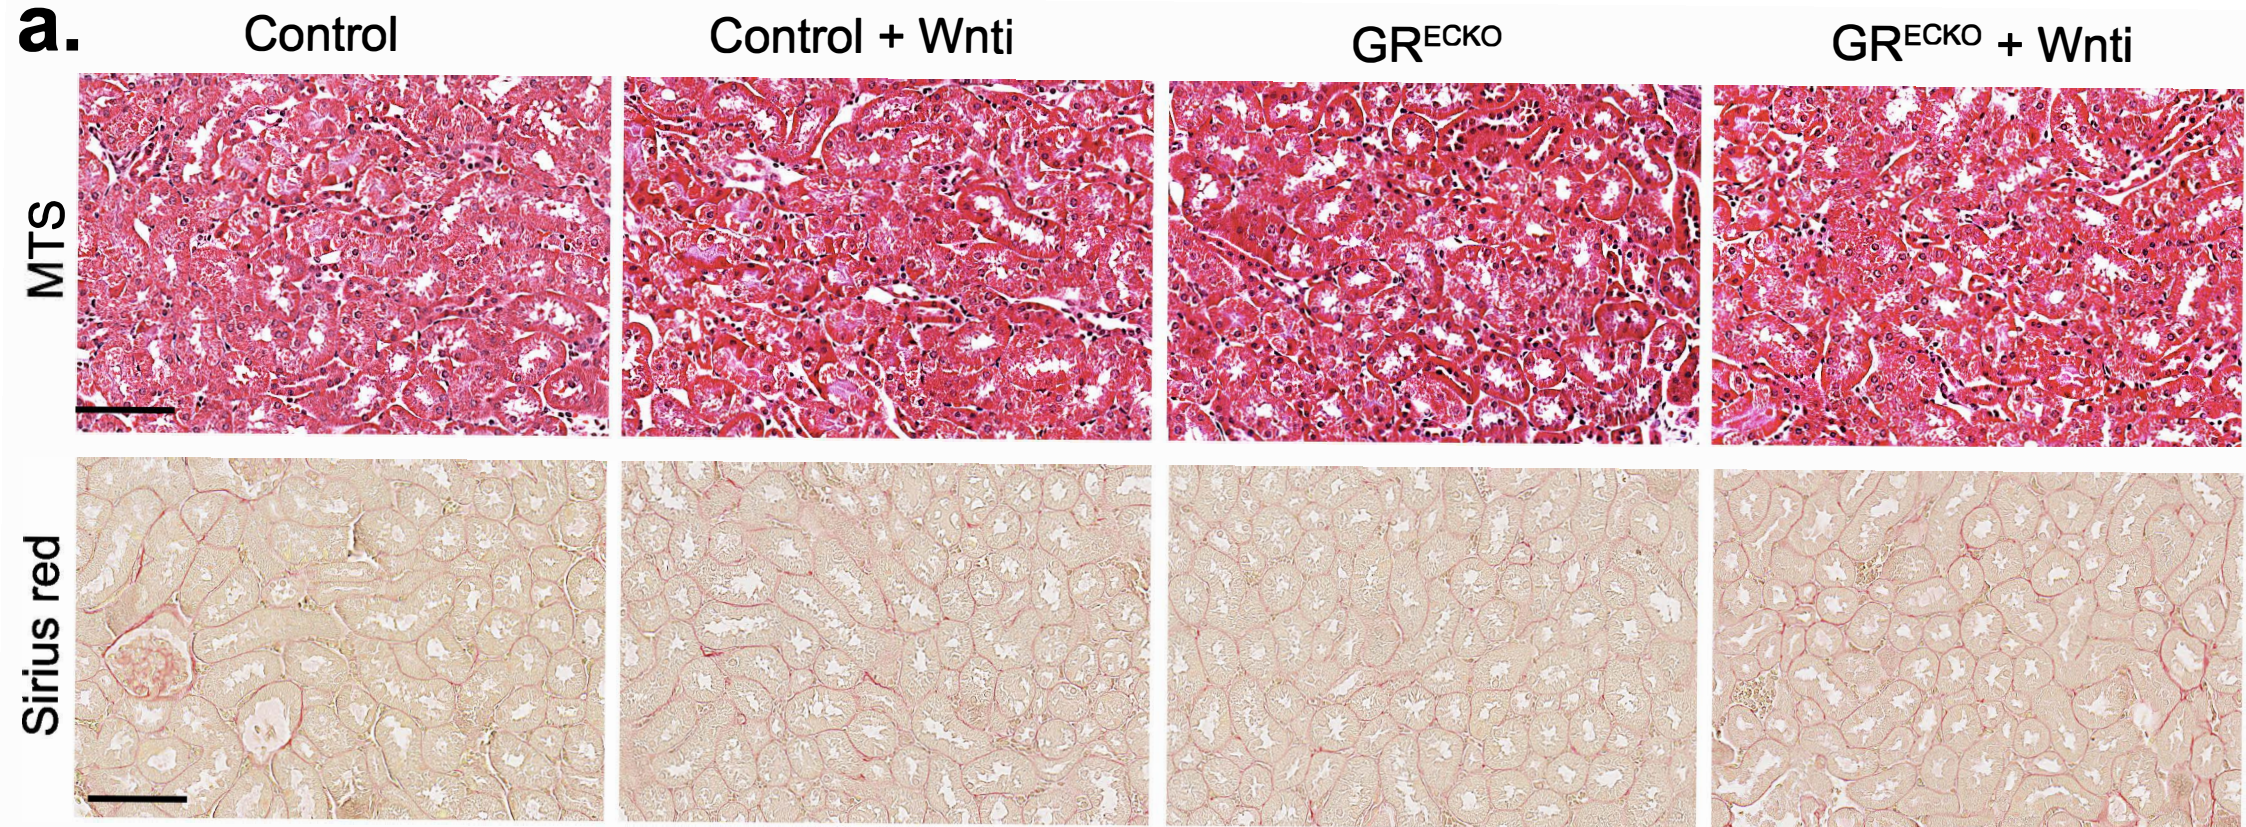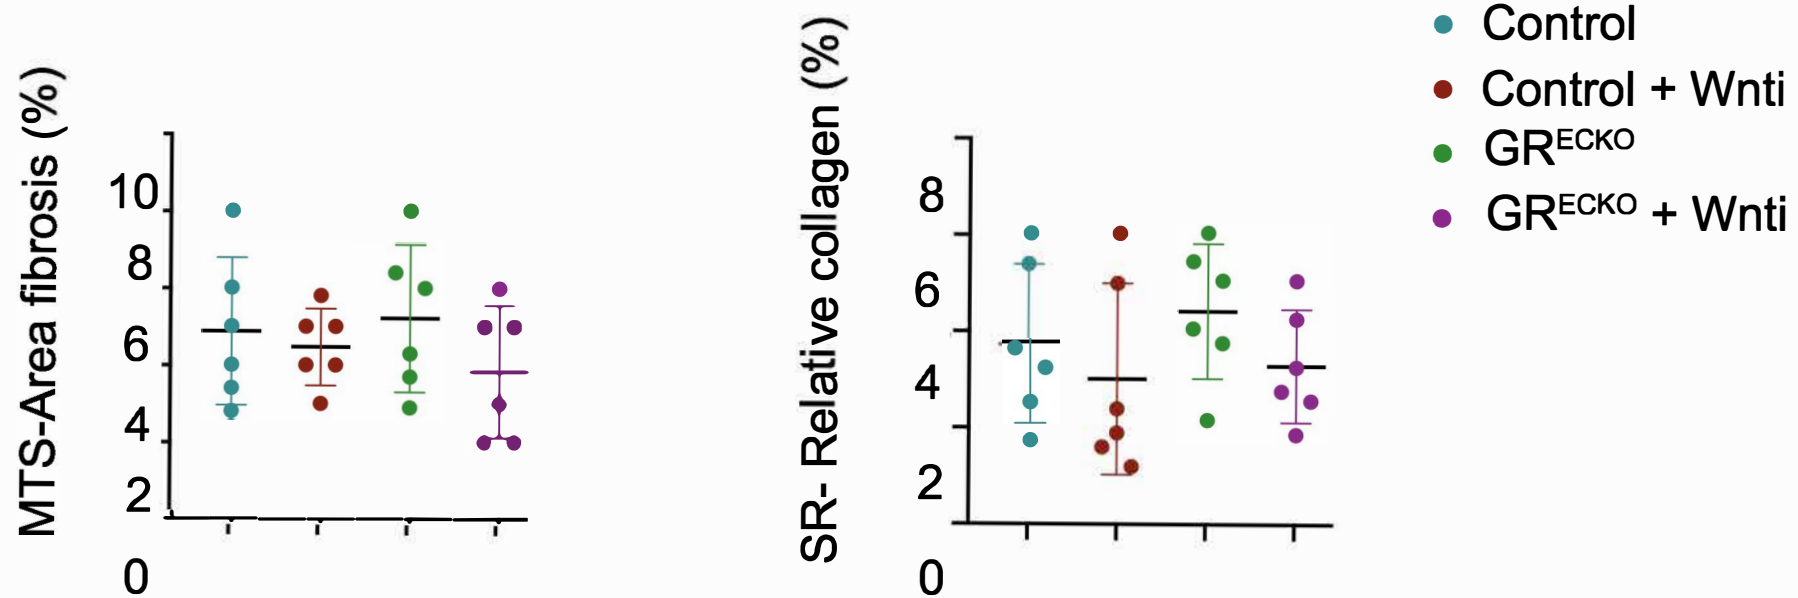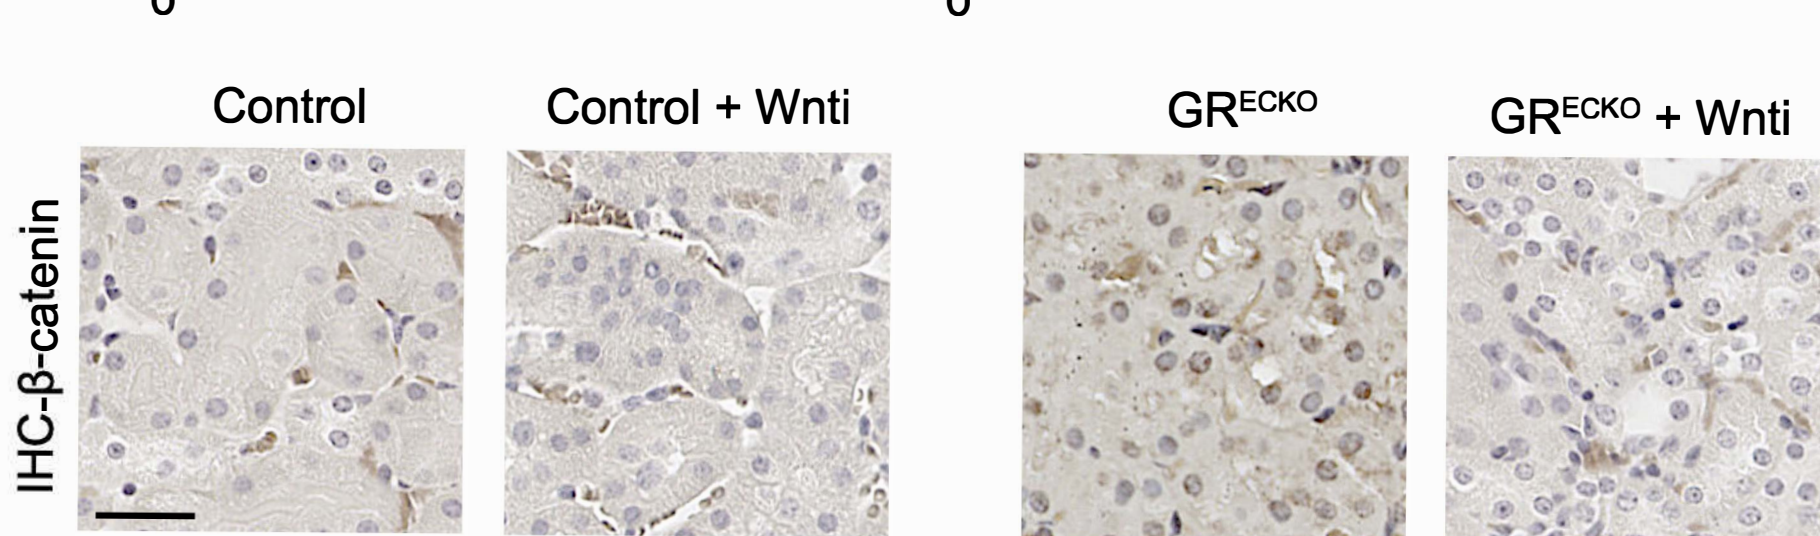



LGK974  
(Wnti)

—

+

—

+

IHC:Snail1

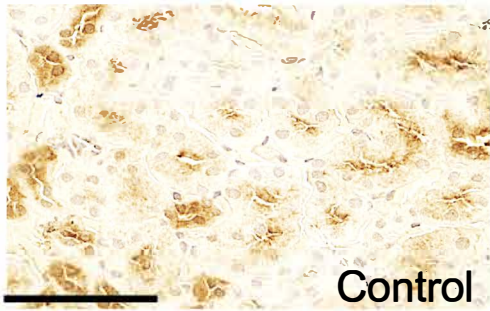

Control

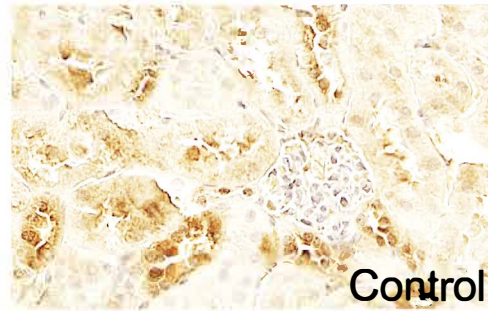

Control

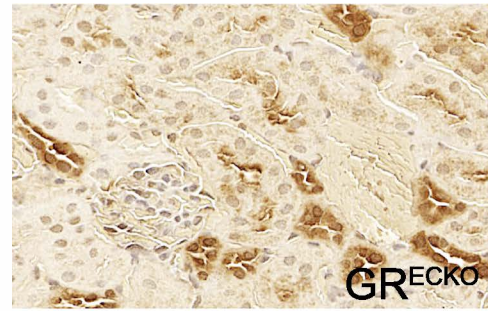GR<sup>ECKO</sup>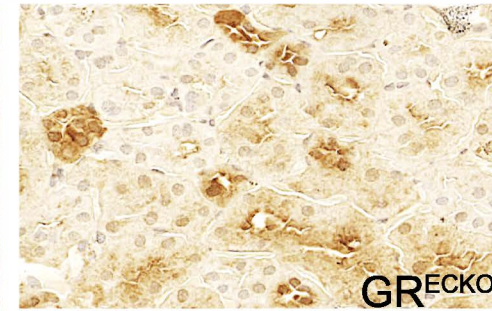GR<sup>ECKO</sup>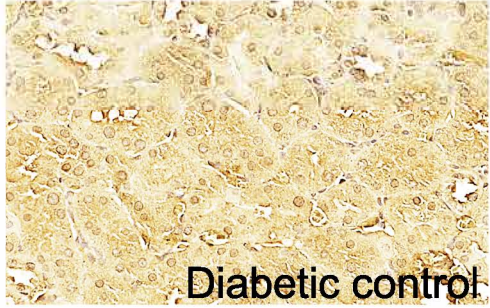

Diabetic control

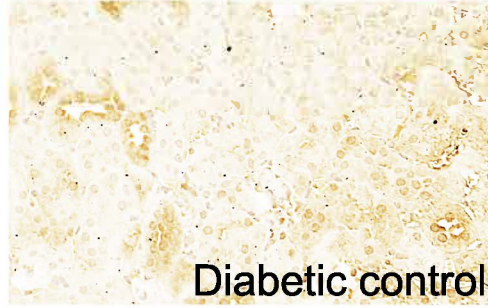

Diabetic control

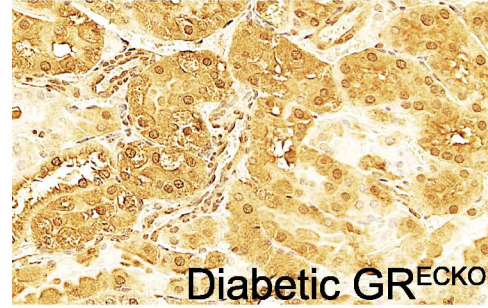Diabetic GR<sup>ECKO</sup>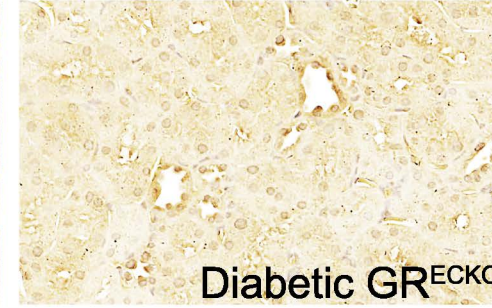Diabetic GR<sup>ECKO</sup>IHC:PPAR $\alpha$ 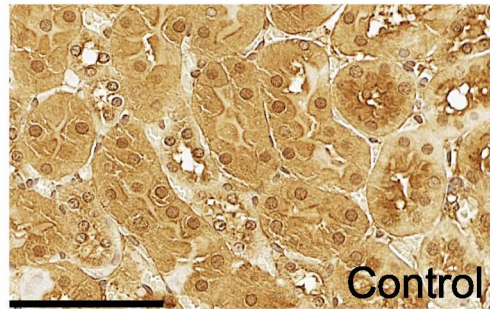

Control

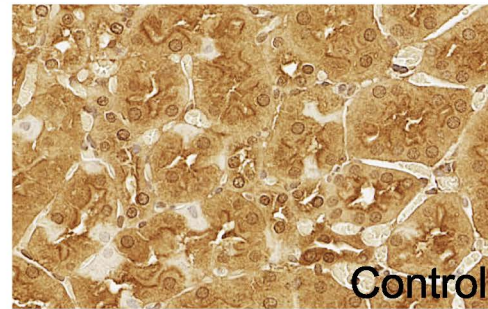

Control

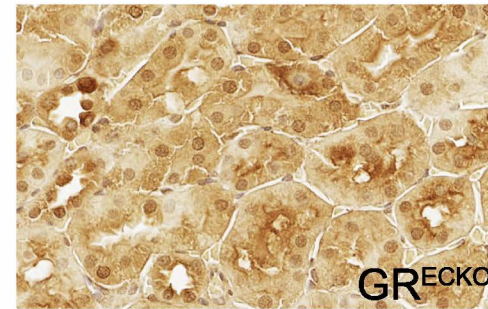GR<sup>ECKO</sup>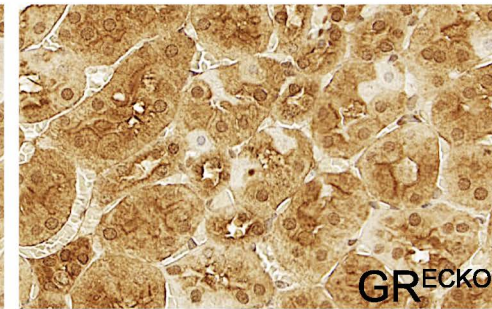GR<sup>ECKO</sup>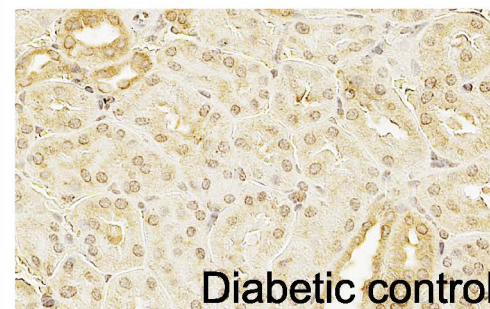

Diabetic control

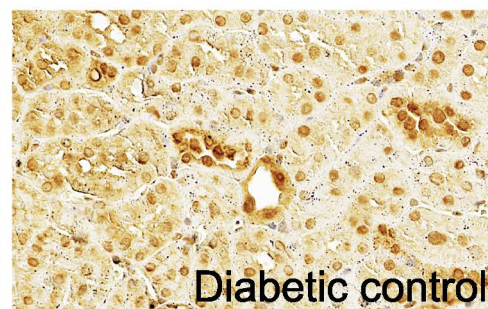

Diabetic control

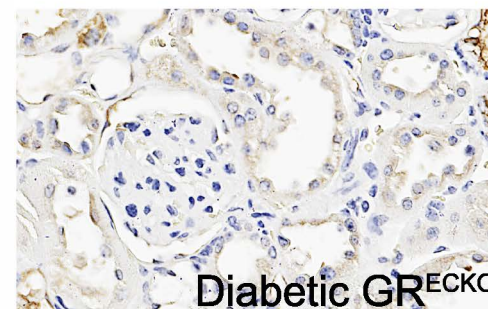Diabetic GR<sup>ECKO</sup>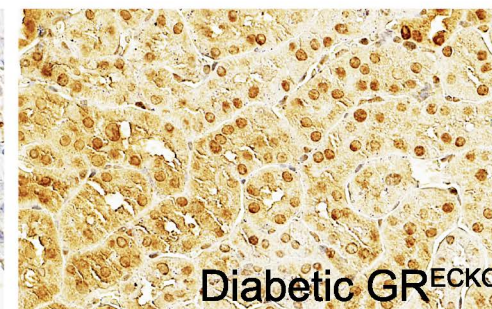Diabetic GR<sup>ECKO</sup>IHC:HIF1 $\alpha$ 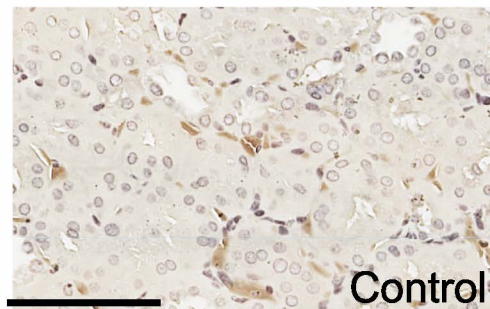

Control

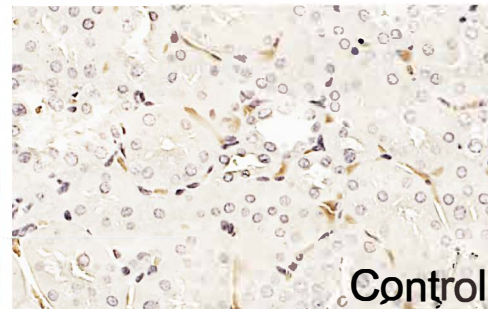

Control

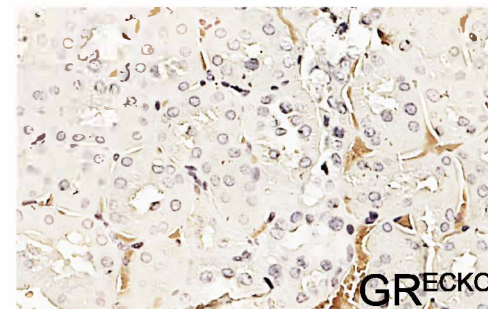GR<sup>ECKO</sup>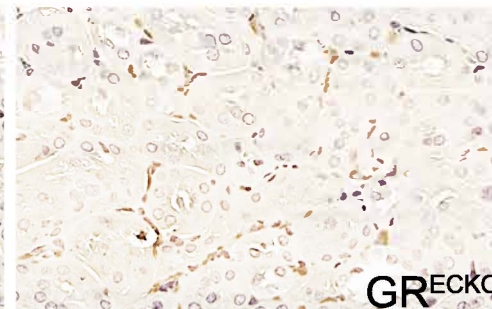GR<sup>ECKO</sup>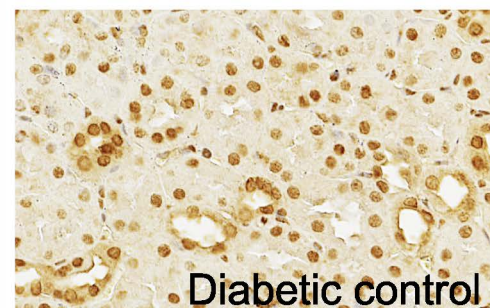

Diabetic control

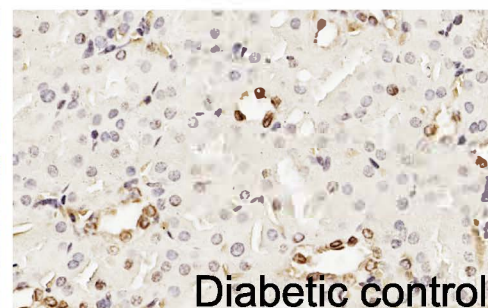

Diabetic control

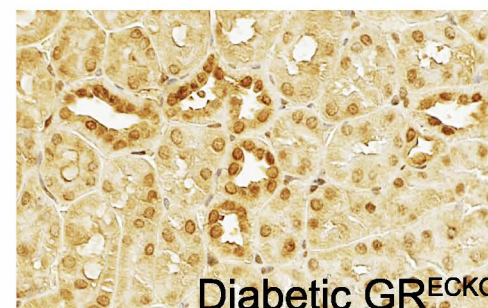Diabetic GR<sup>ECKO</sup>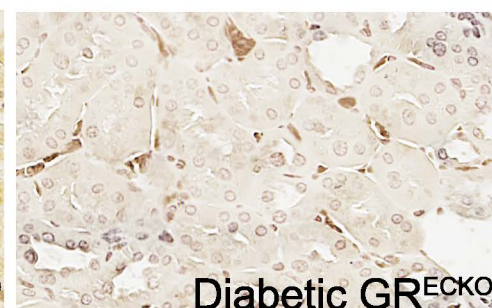Diabetic GR<sup>ECKO</sup>

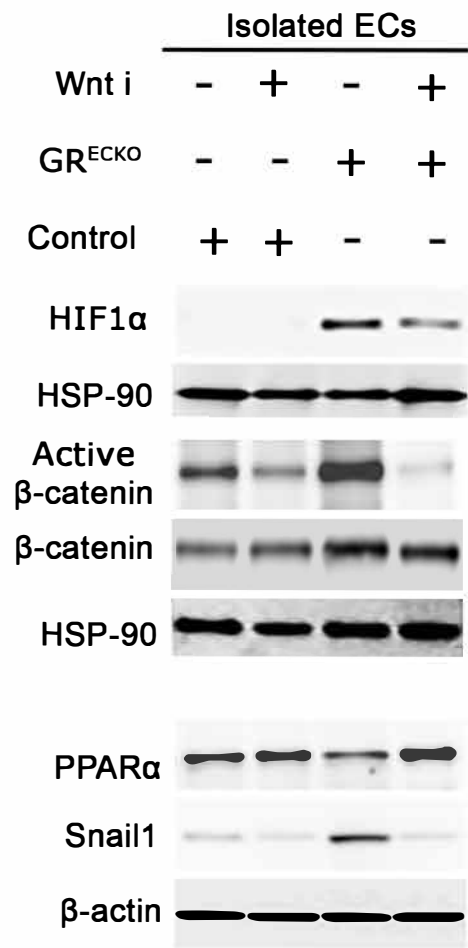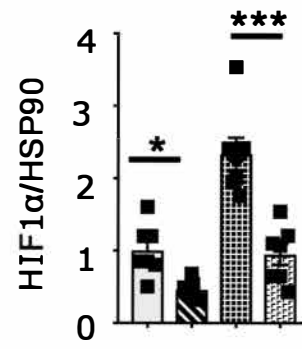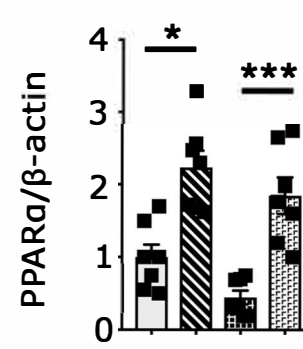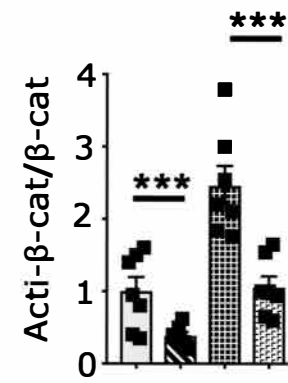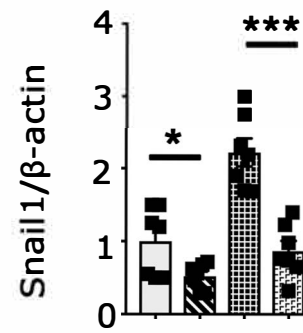

□ Diabetic control  
 ▨ Diabetic control + Wnt i  
 ▩ Diabetic GR<sup>ECKO</sup>  
 ▪ Diabetic GR<sup>ECKO</sup> + Wnt i

$\alpha$ SMA/CD31

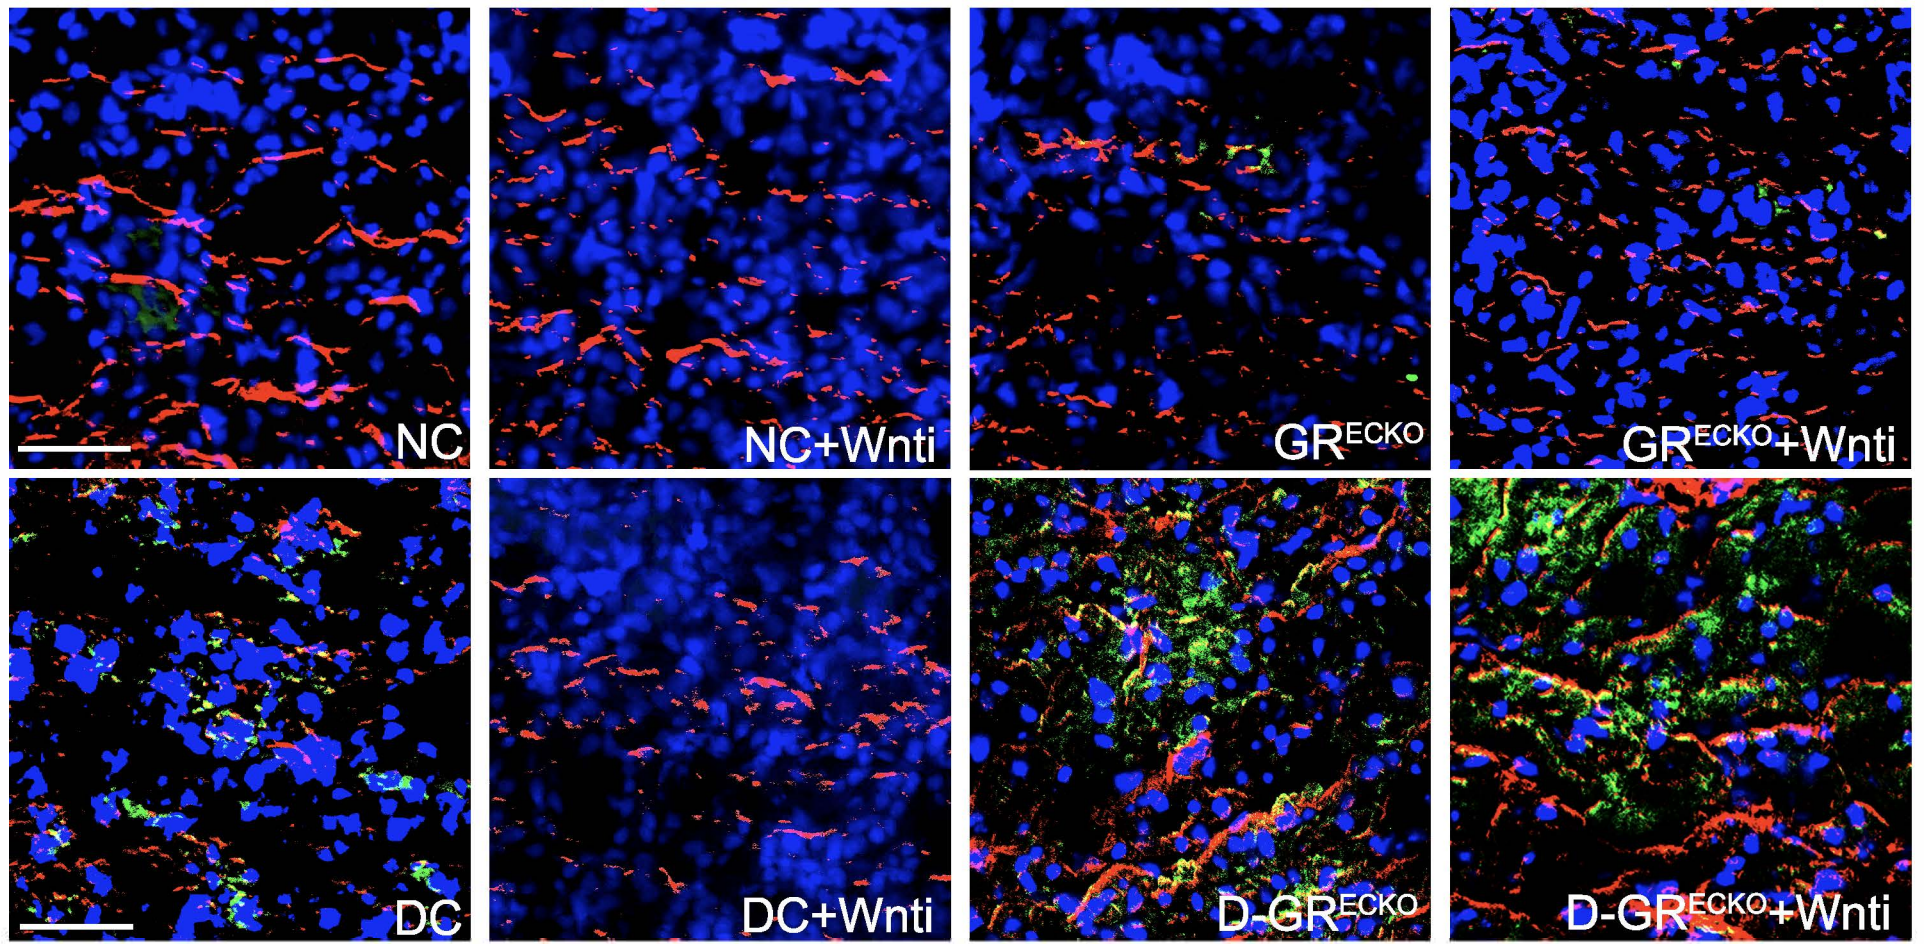

E-cadherin/ $\alpha$ SMA

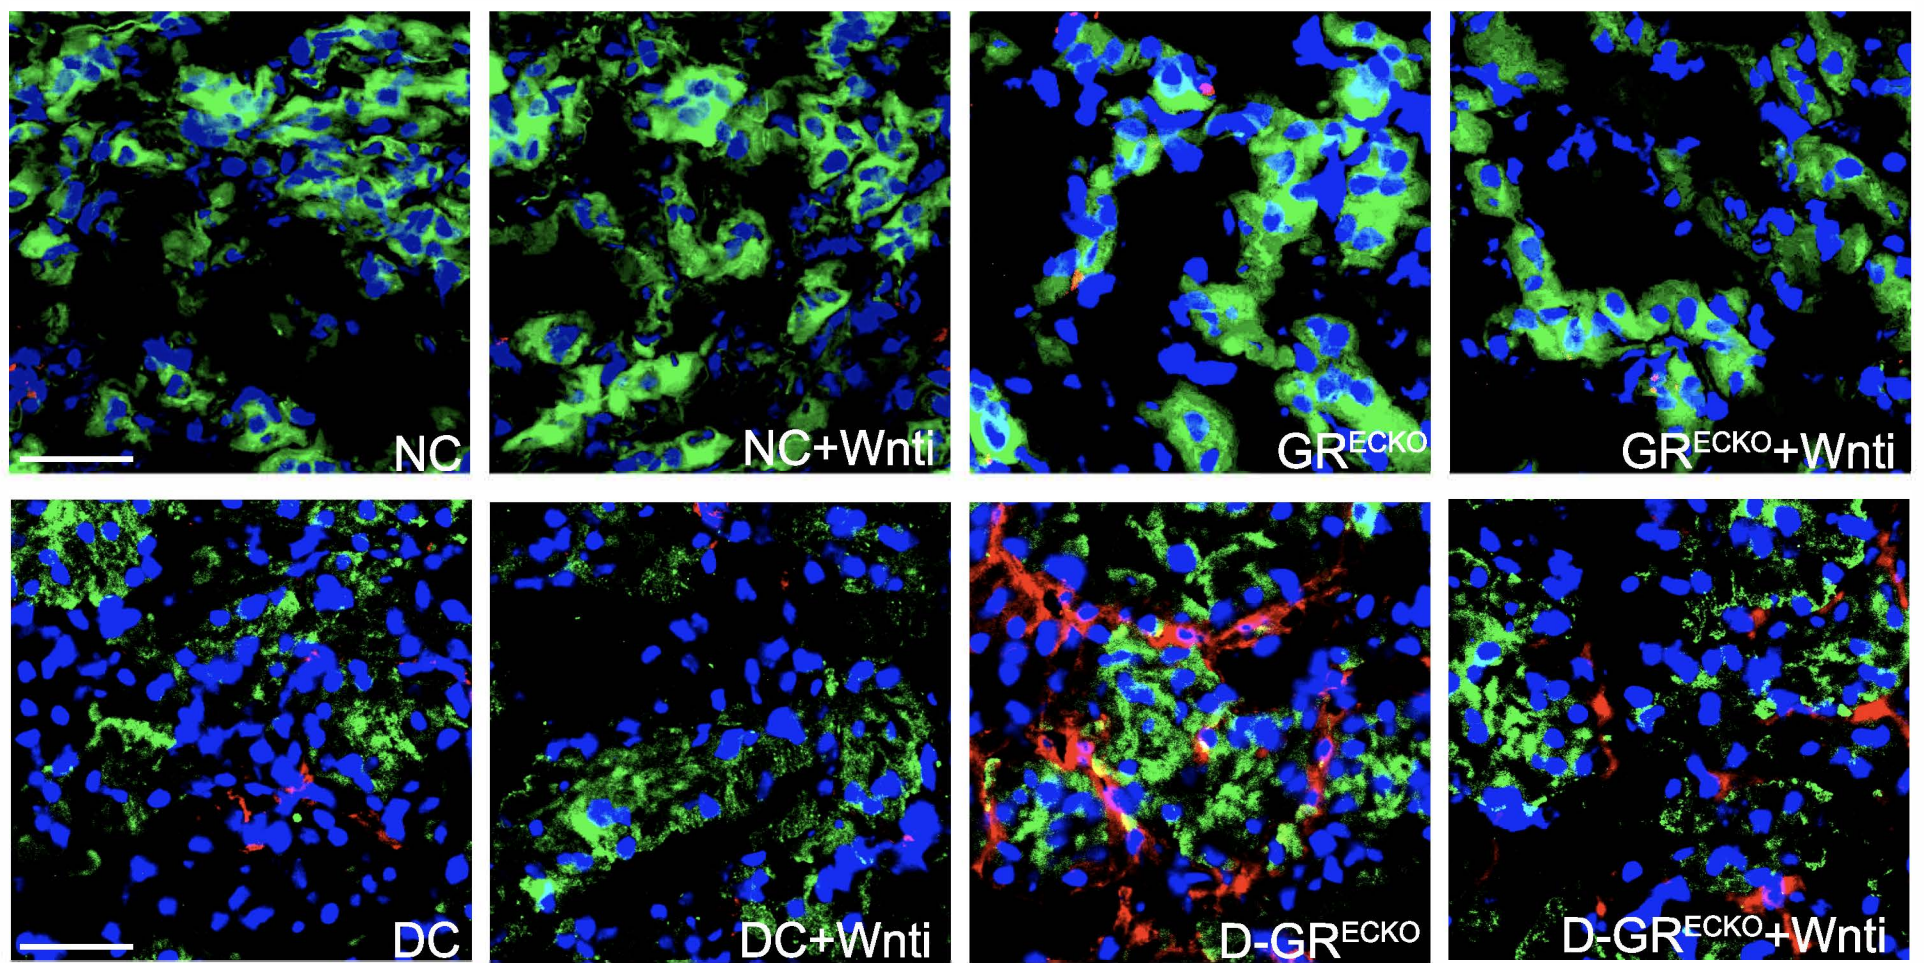

Supplementary Figure 22

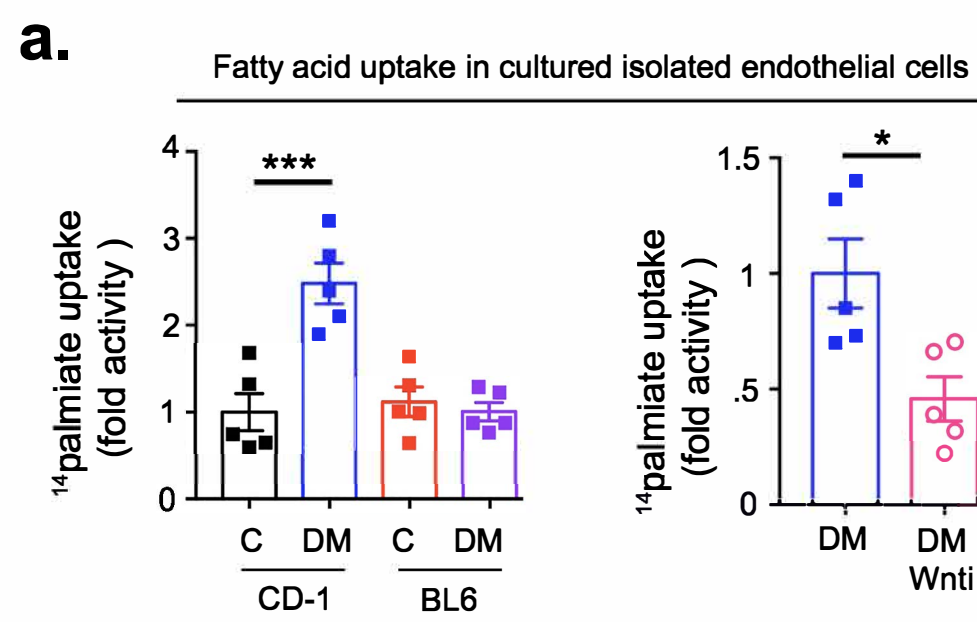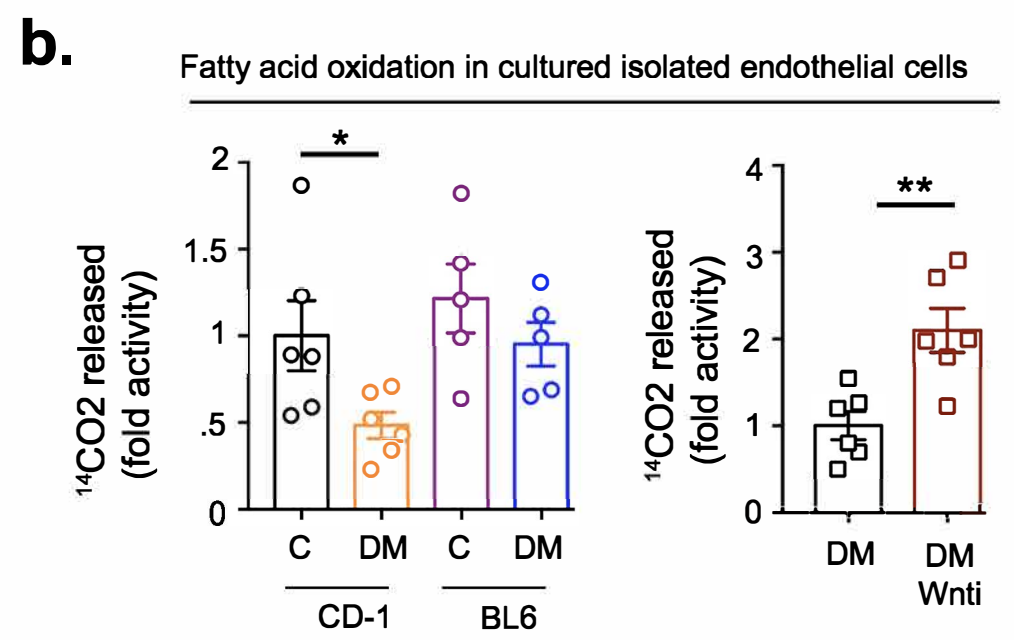

Supplementary Figure 23

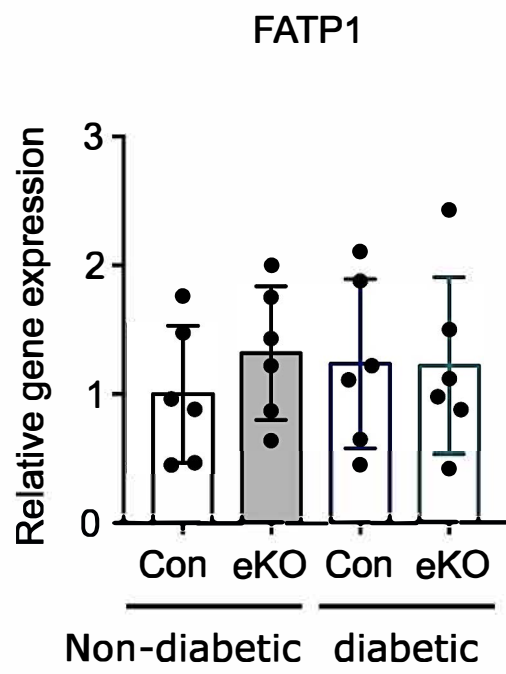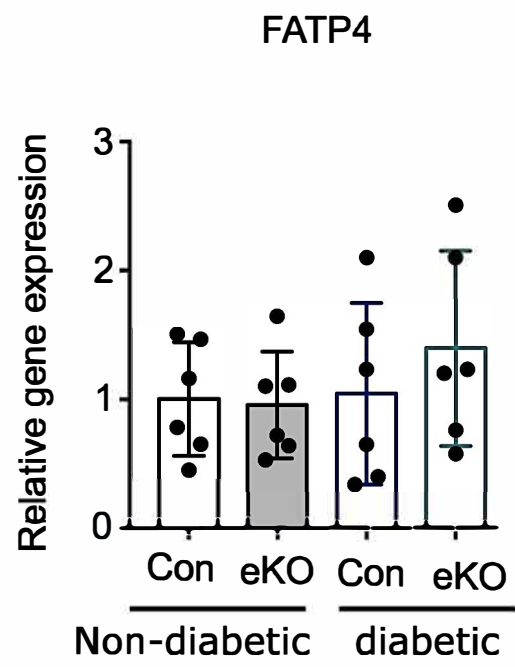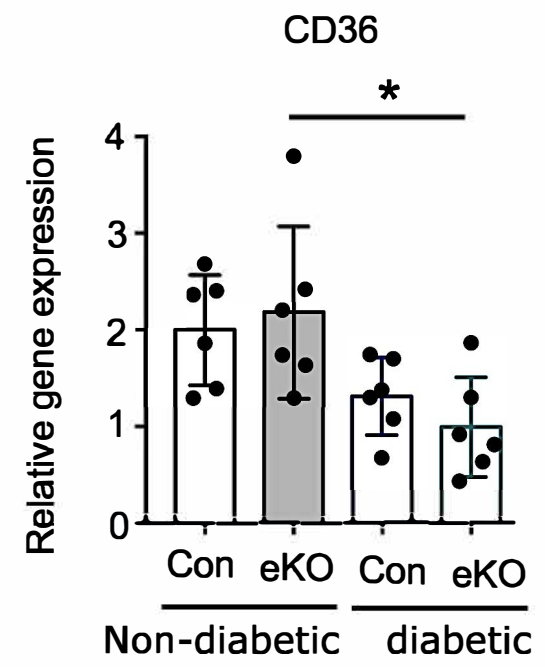

Supplementary Figure 24

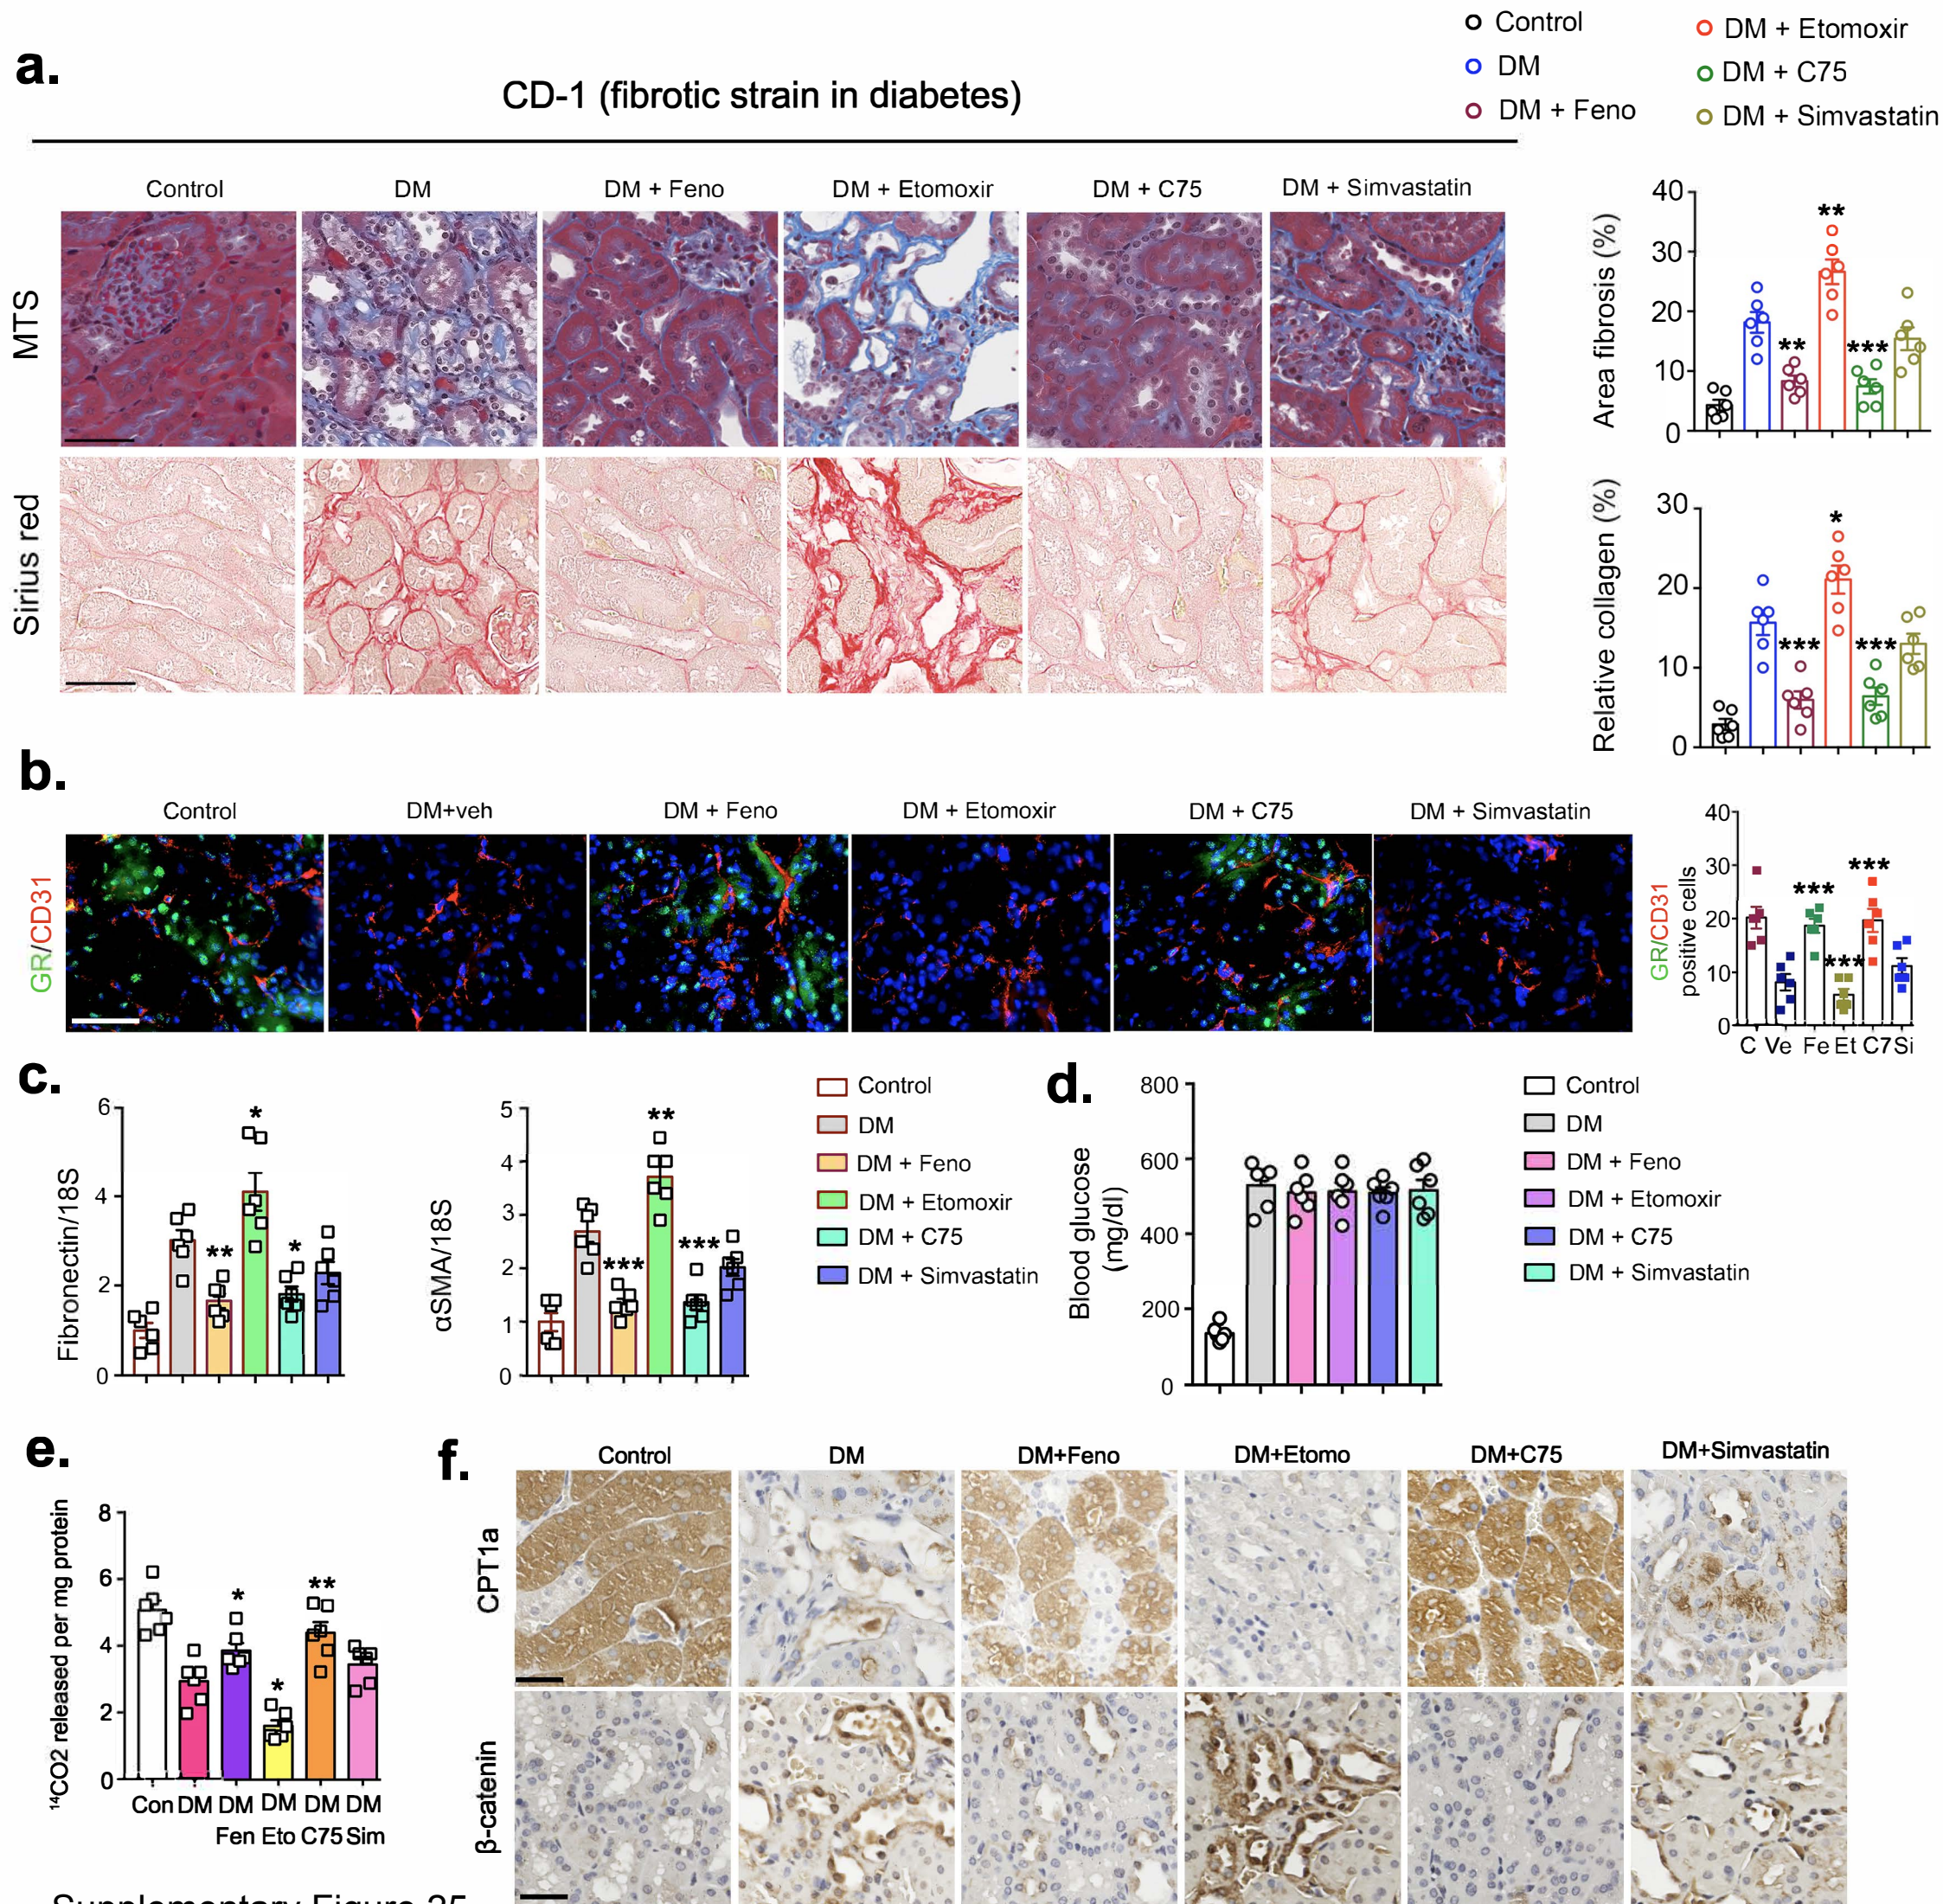

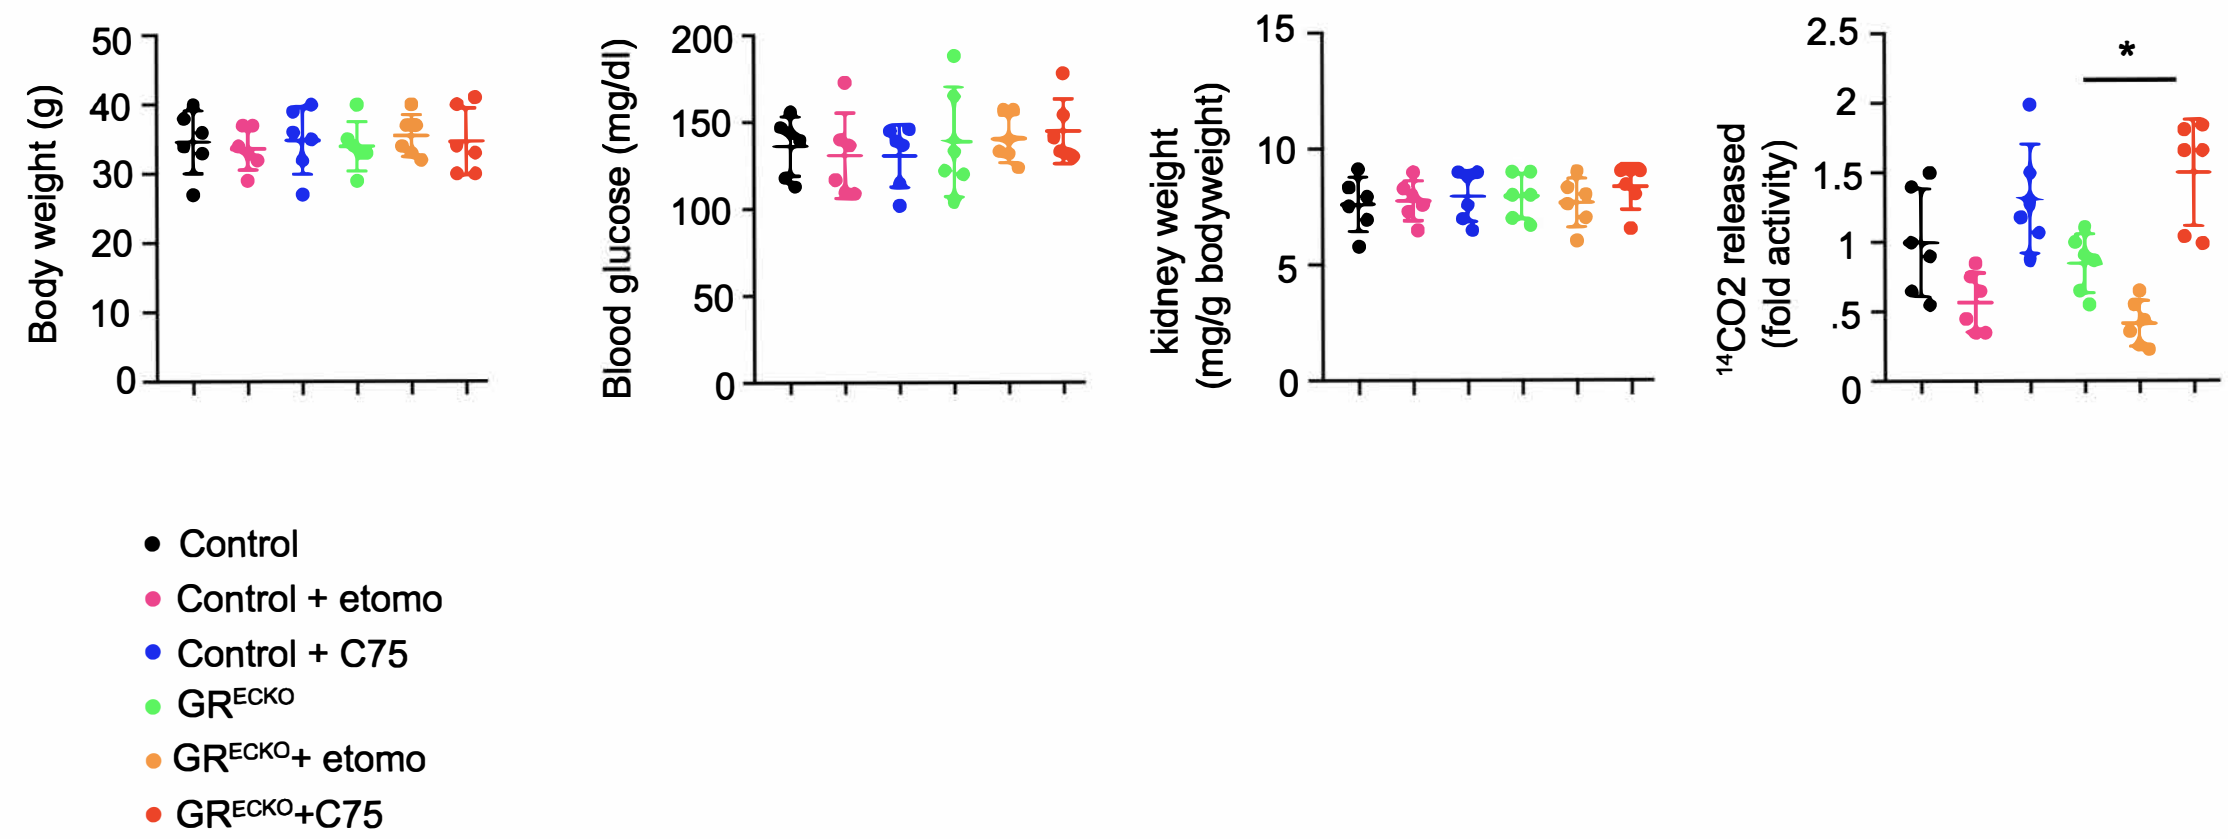

Supplementary Figure 26

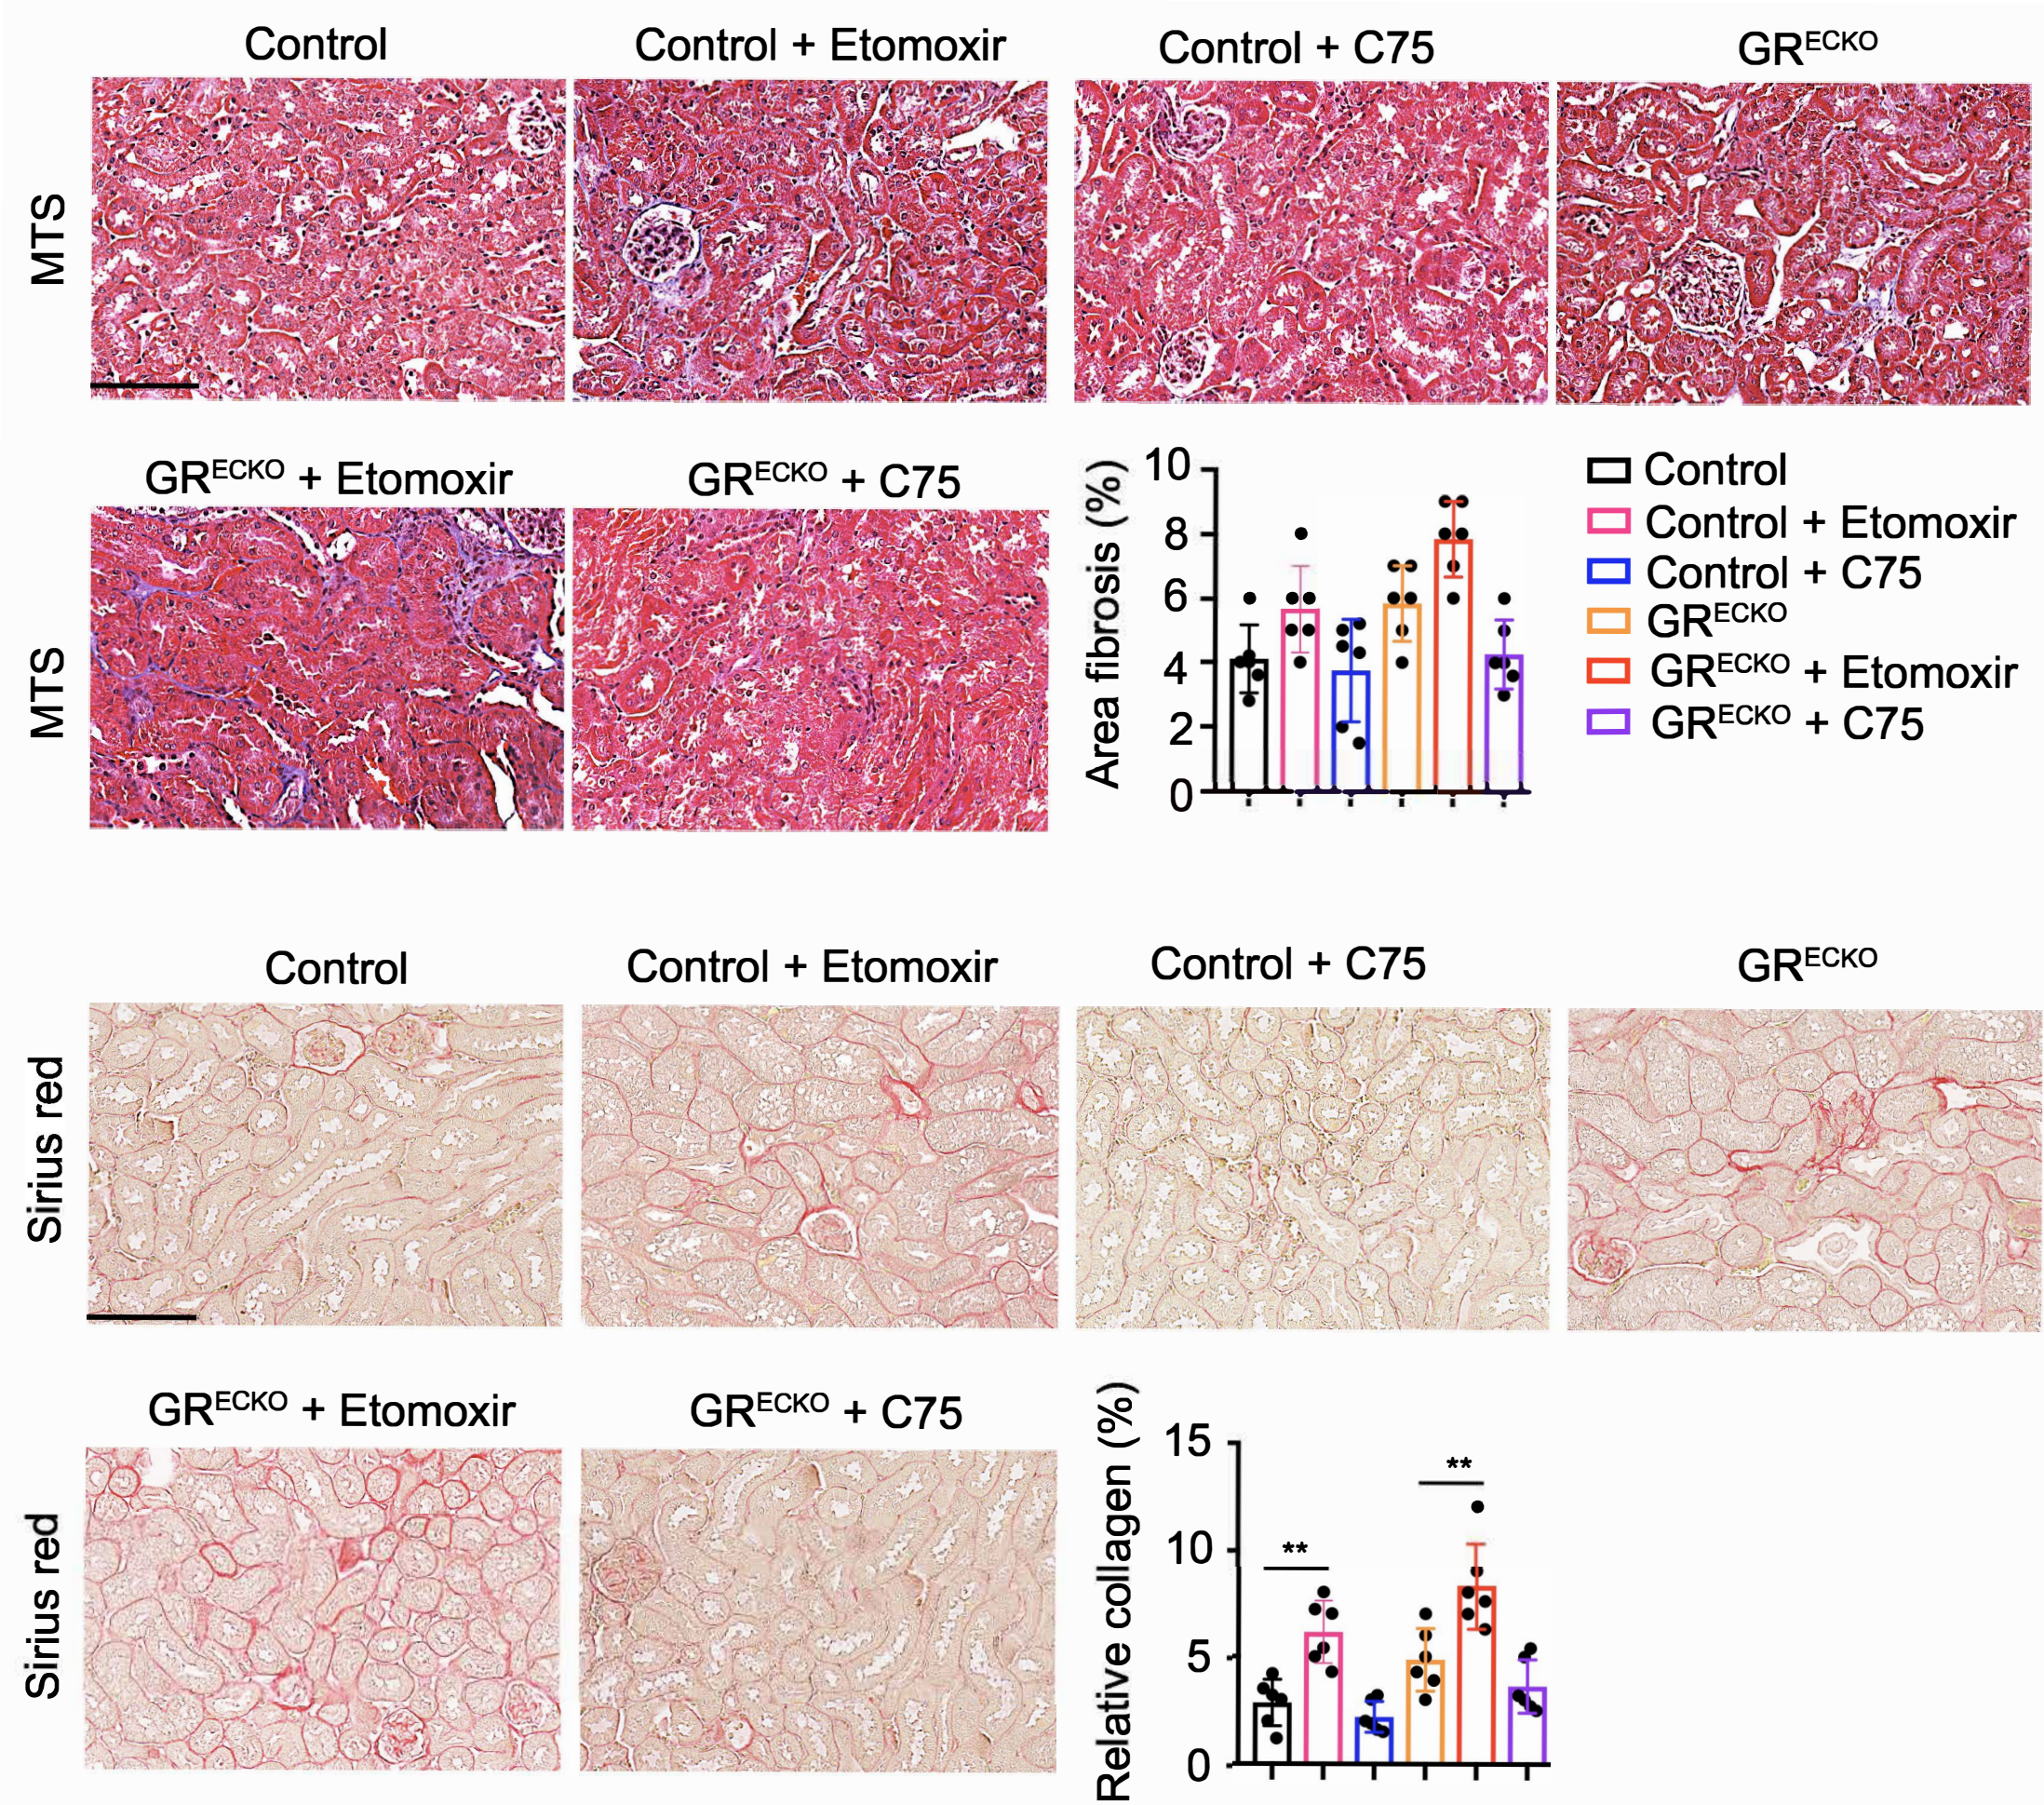

Supplementary Figure 27



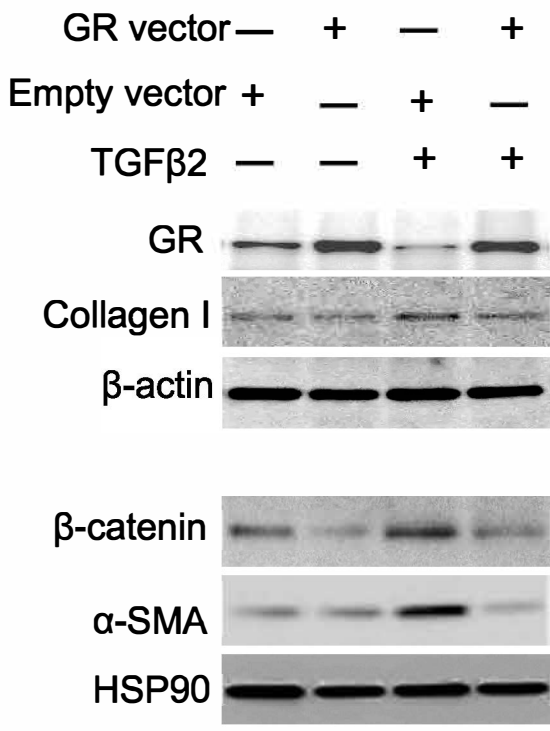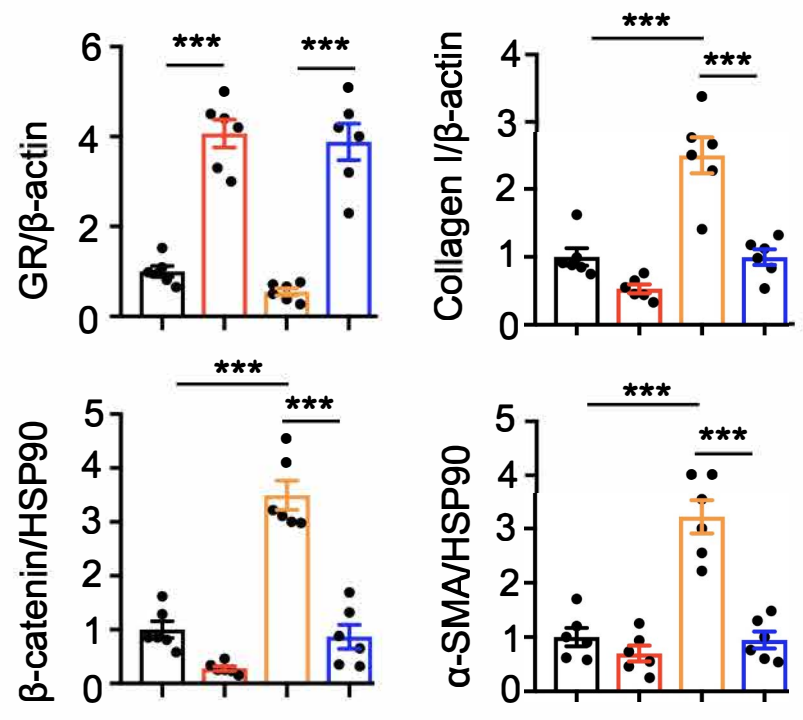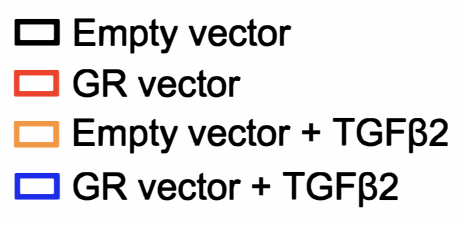

Supplementary Figure 28
